# Supplementary material for: One-pot synthesis of symmetrical bis-sulfonyl 2,6-diarylpyridines via BiCl 3 -catalyzed and K 2 S 2 O 8 -mediated domino annulation of β-ketosulfones and N , N -dimethylacetamide
Source: Royal Society of Chemistry journal article supplement (doi:10.1039/d4ob01681e), 2024-11-25
Supplement: d4ob01681e1.pdf [file d4ob01681e1.pdf]

# Supporting Information

## One-pot Synthesis of Symmetrical Bis-sulfonyl 2,6-Diarylpyridines via BiCl<sub>3</sub>-Catalyzed and K<sub>2</sub>S<sub>2</sub>O<sub>8</sub>-Mediated Domino Annulation of $\beta$ -Ketosulfones and *N,N*-Dimethylacetamide

Meng-Yang Chang<sup>\*a,b,c</sup> and Chun-Yi Lin<sup>a</sup>

<sup>a</sup>Department of Medicinal and Applied Chemistry, Kaohsiung Medical University, Kaohsiung 807, Taiwan. <sup>b</sup>Department of Medical Research, Kaohsiung Medical University Hospital, Kaohsiung 807, Taiwan. <sup>c</sup> NPUST College of Professional Studies, National Pingtung University of Science and Technology, Pingtung 912, Taiwan.

\*Corresponding author, email: [mychang@kmu.edu.tw](mailto:mychang@kmu.edu.tw)

### Table of Contents

|    |                                                                                                      |         |
|----|------------------------------------------------------------------------------------------------------|---------|
| 1. | <sup>1</sup> H NMR, <sup>13</sup> C and <sup>19</sup> F NMR spectra copies of compounds <b>4a-4s</b> | S2~S42  |
| 2. | <sup>1</sup> H NMR and <sup>13</sup> C NMR spectra copies of compound <b>5</b>                       | S43~S44 |
| 3. | <sup>1</sup> H NMR and <sup>13</sup> C NMR spectra copies of compounds <b>6a, 8a, 9</b>              | S45~S50 |
| 4. | X-ray crystal data of compounds <b>4b, 4j</b> and <b>5</b>                                           | S51~S56 |

# Compound 4a (<sup>1</sup>H-NMR spectral data)

YCM1319

Pulse Sequence: s2pu1

UNITYplus-400 "unity400"

Date: Sep 19 2022

Solvent: CDCl<sub>3</sub>

Ambient temperature

Total 32 repetitions

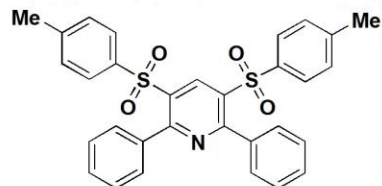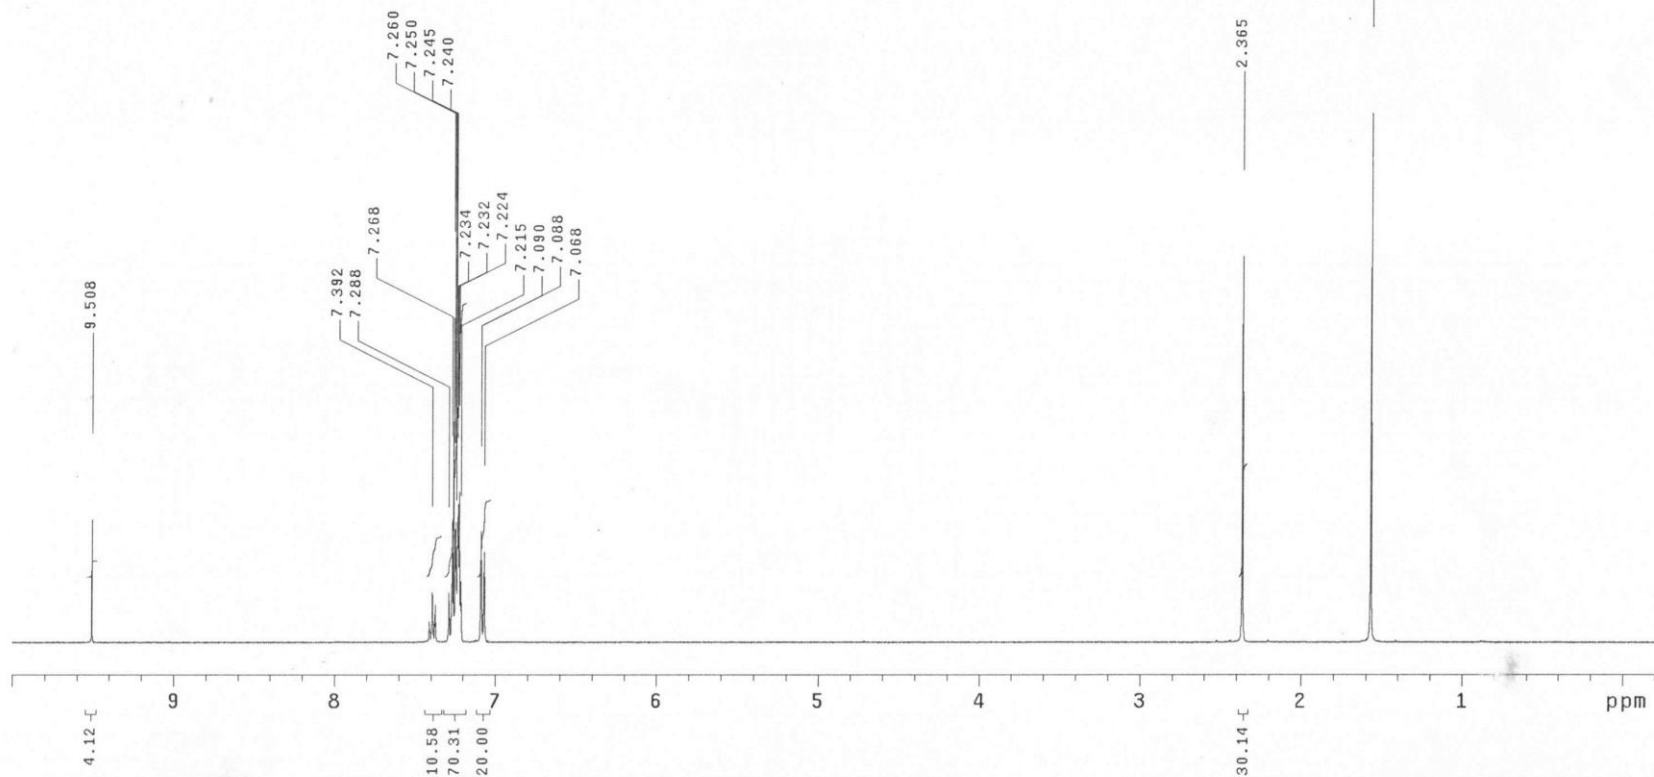

# Compound 4a (<sup>13</sup>C-NMR spectral data)

YCM1319

Pulse Sequence: s2pu1

UNITYplus-400 "unity400"

Date: Sep 19 2022

Solvent: CDCl<sub>3</sub>

Ambient temperature

Total 6448 repetitions

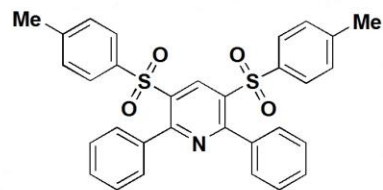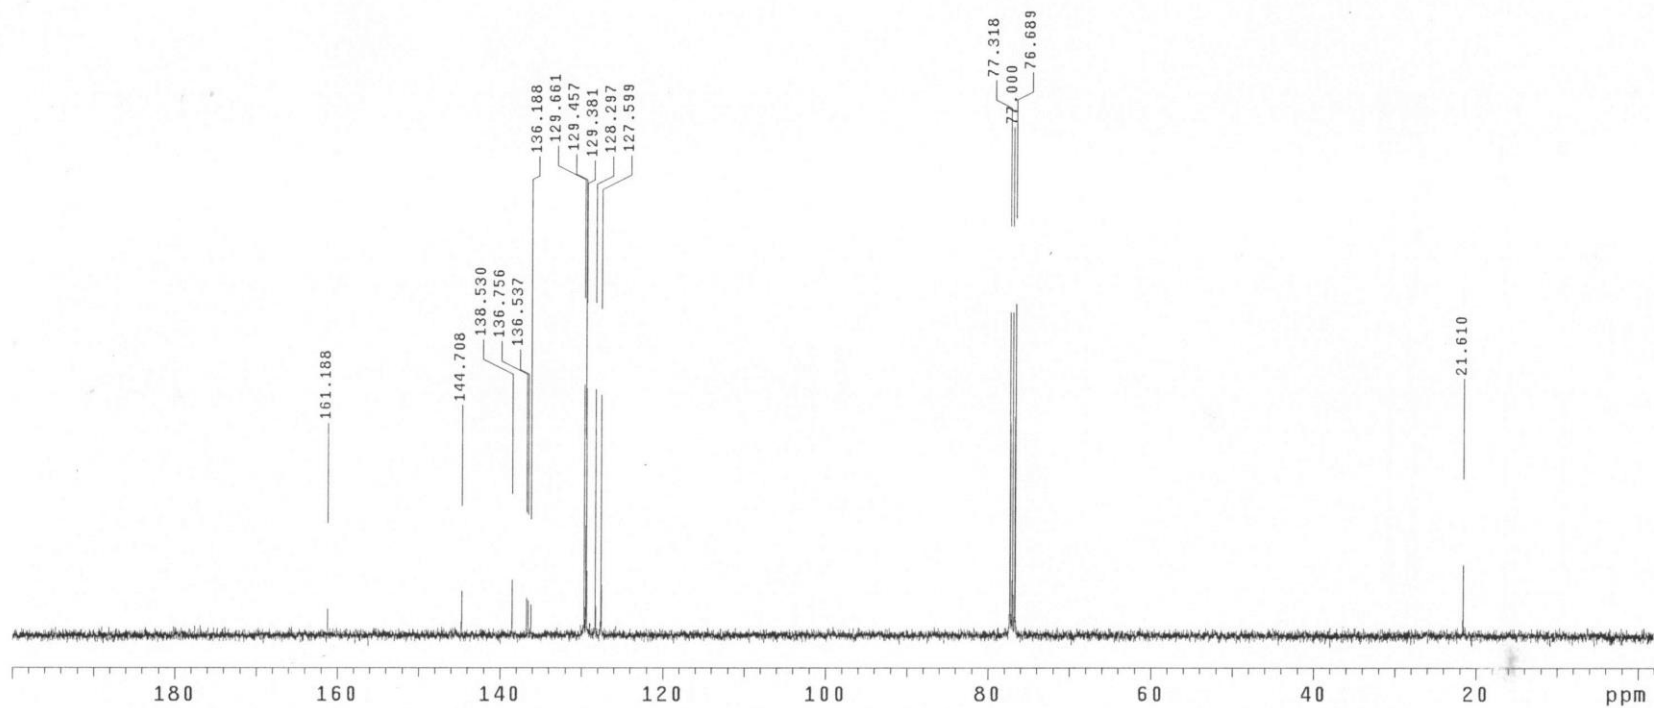

# Compound 4b (<sup>1</sup>H-NMR spectral data)

YCM927

Pulse Sequence: s2pu1

UNITYplus-400 "unity400"

Date: Sep 29 2022

Solvent: CDCl<sub>3</sub>

Ambient temperature

Total 76 repetitions

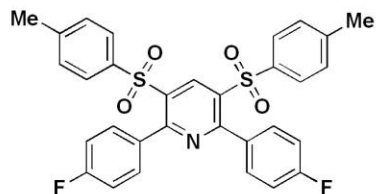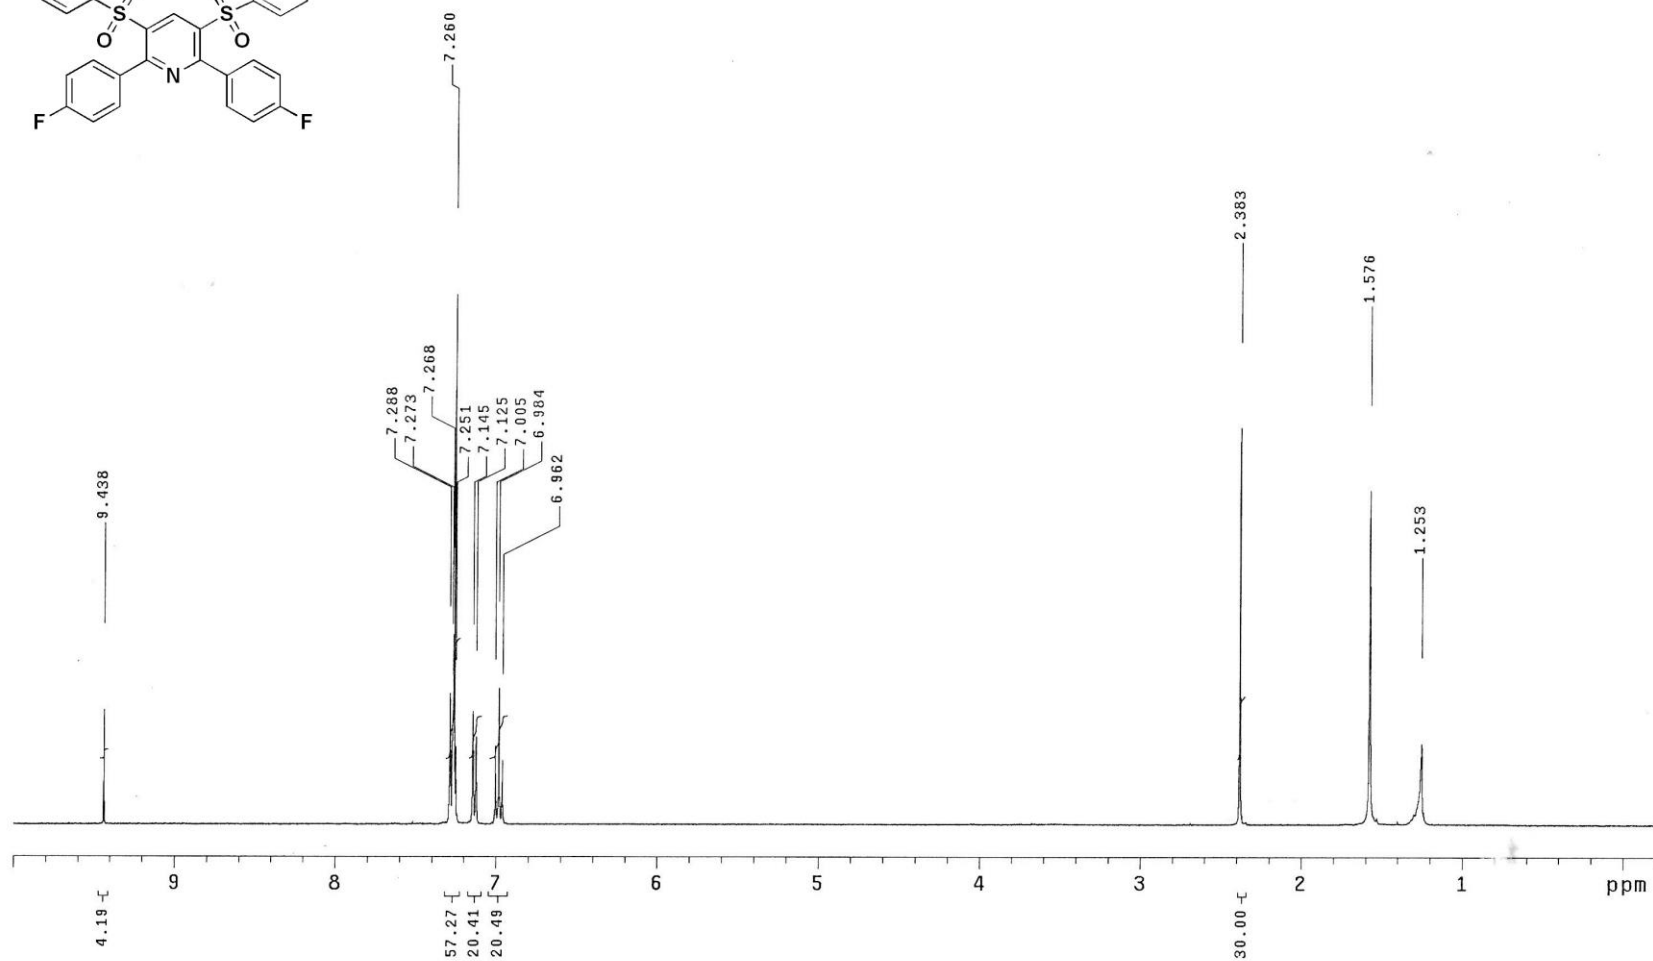

# Compound 4b (<sup>13</sup>C-NMR spectral data)

YCM927

Pulse Sequence: s2pu1

UNITYplus-400 "unity400"

Date: Sep 29 2022

Solvent: CDCl<sub>3</sub>

Ambient temperature

Total 39392 repetitions

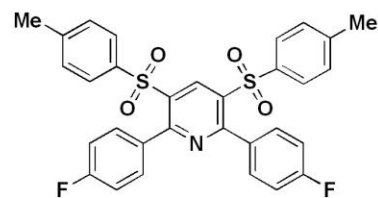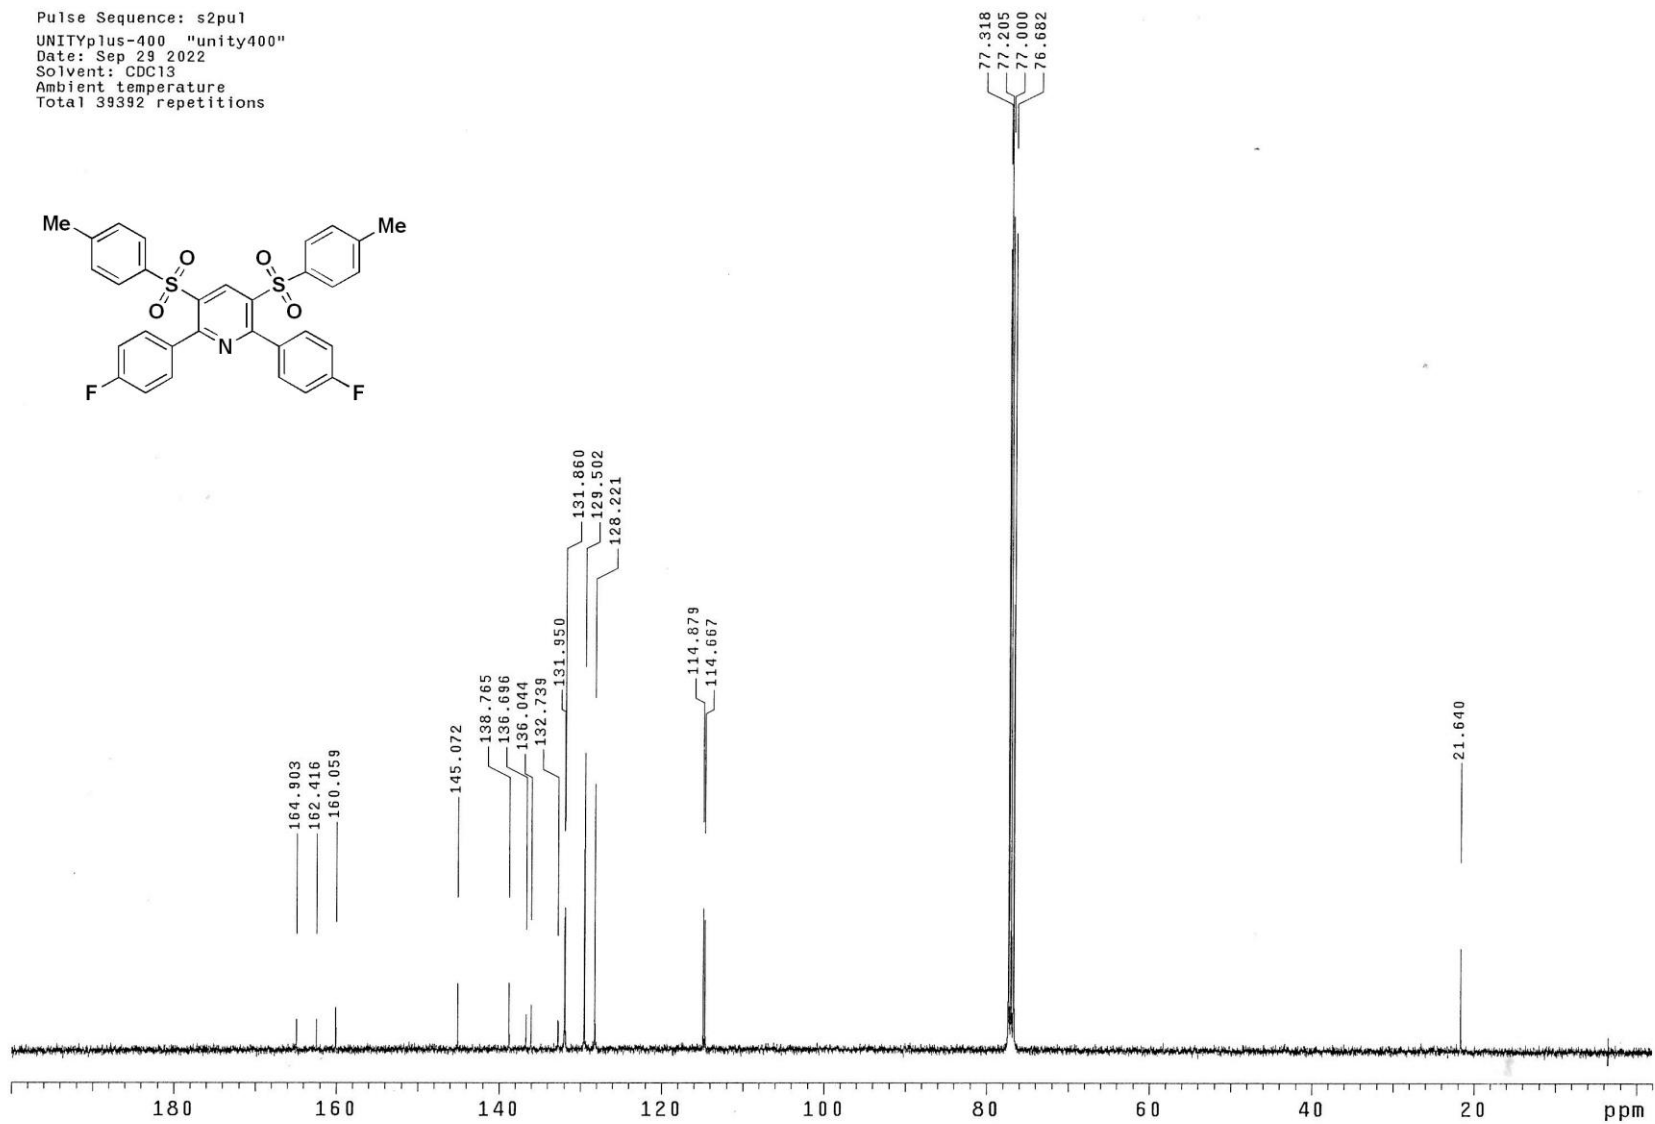

# Compound 4b (<sup>19</sup>F-NMR spectral data)

4b

Pulse Sequence: s2pu1  
Mercury-400BB "MerPlus400"  
Date: Aug 5 2024  
Solvent: cdcl3  
Ambient temperature  
Total 96 repetitions

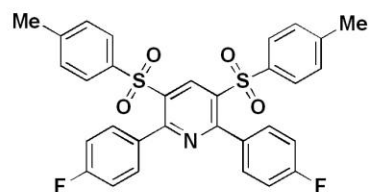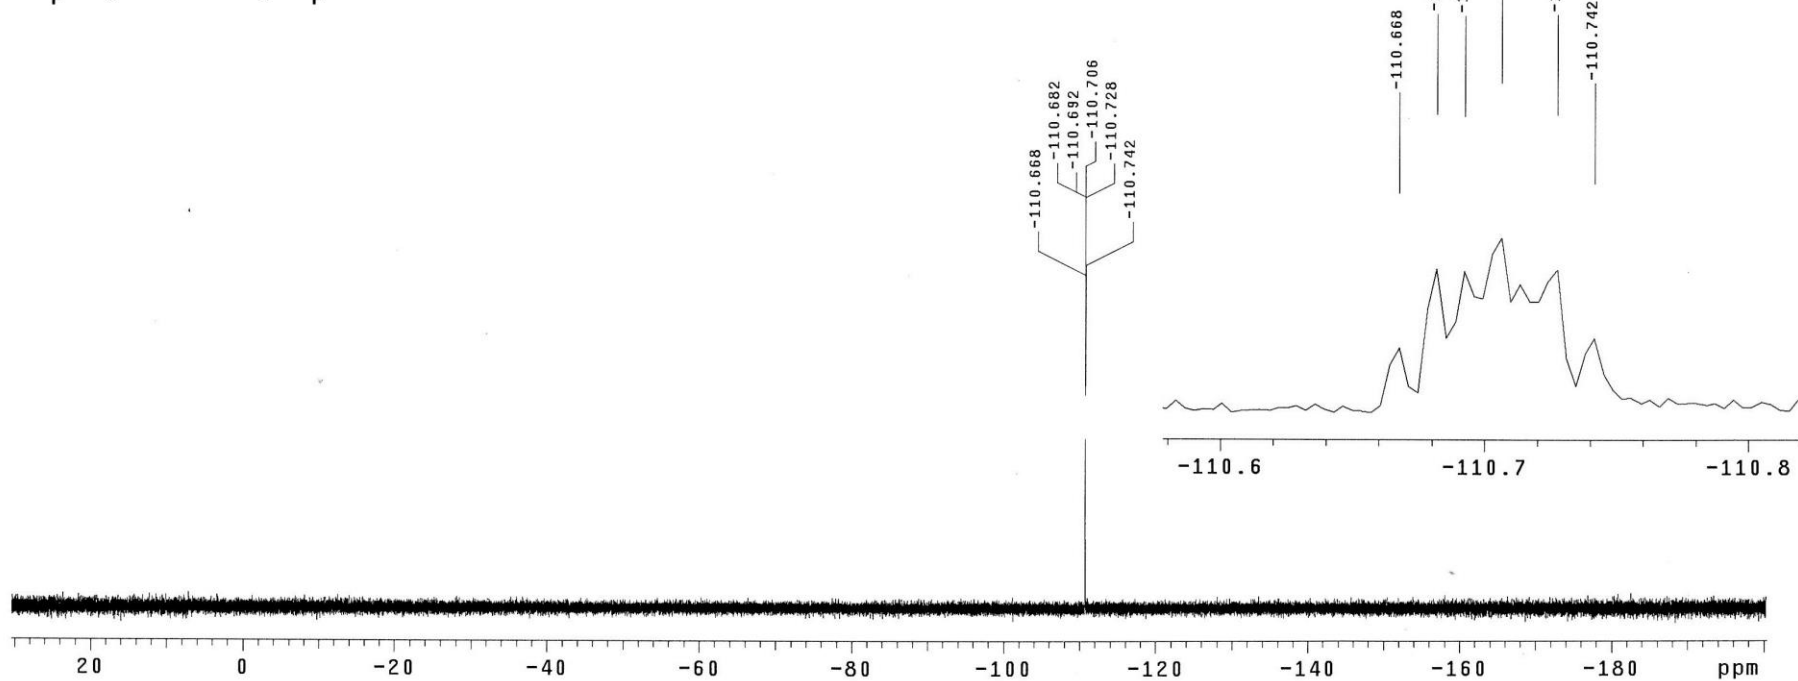

# Compound 4c (<sup>1</sup>H-NMR spectral data)

YCM3239

Pulse Sequence: s2pu1  
 UNITYplus-400 "unity400"  
 Date: Feb 7 2023  
 Solvent: CDCl<sub>3</sub>  
 Ambient temperature  
 Total 120 repetitions

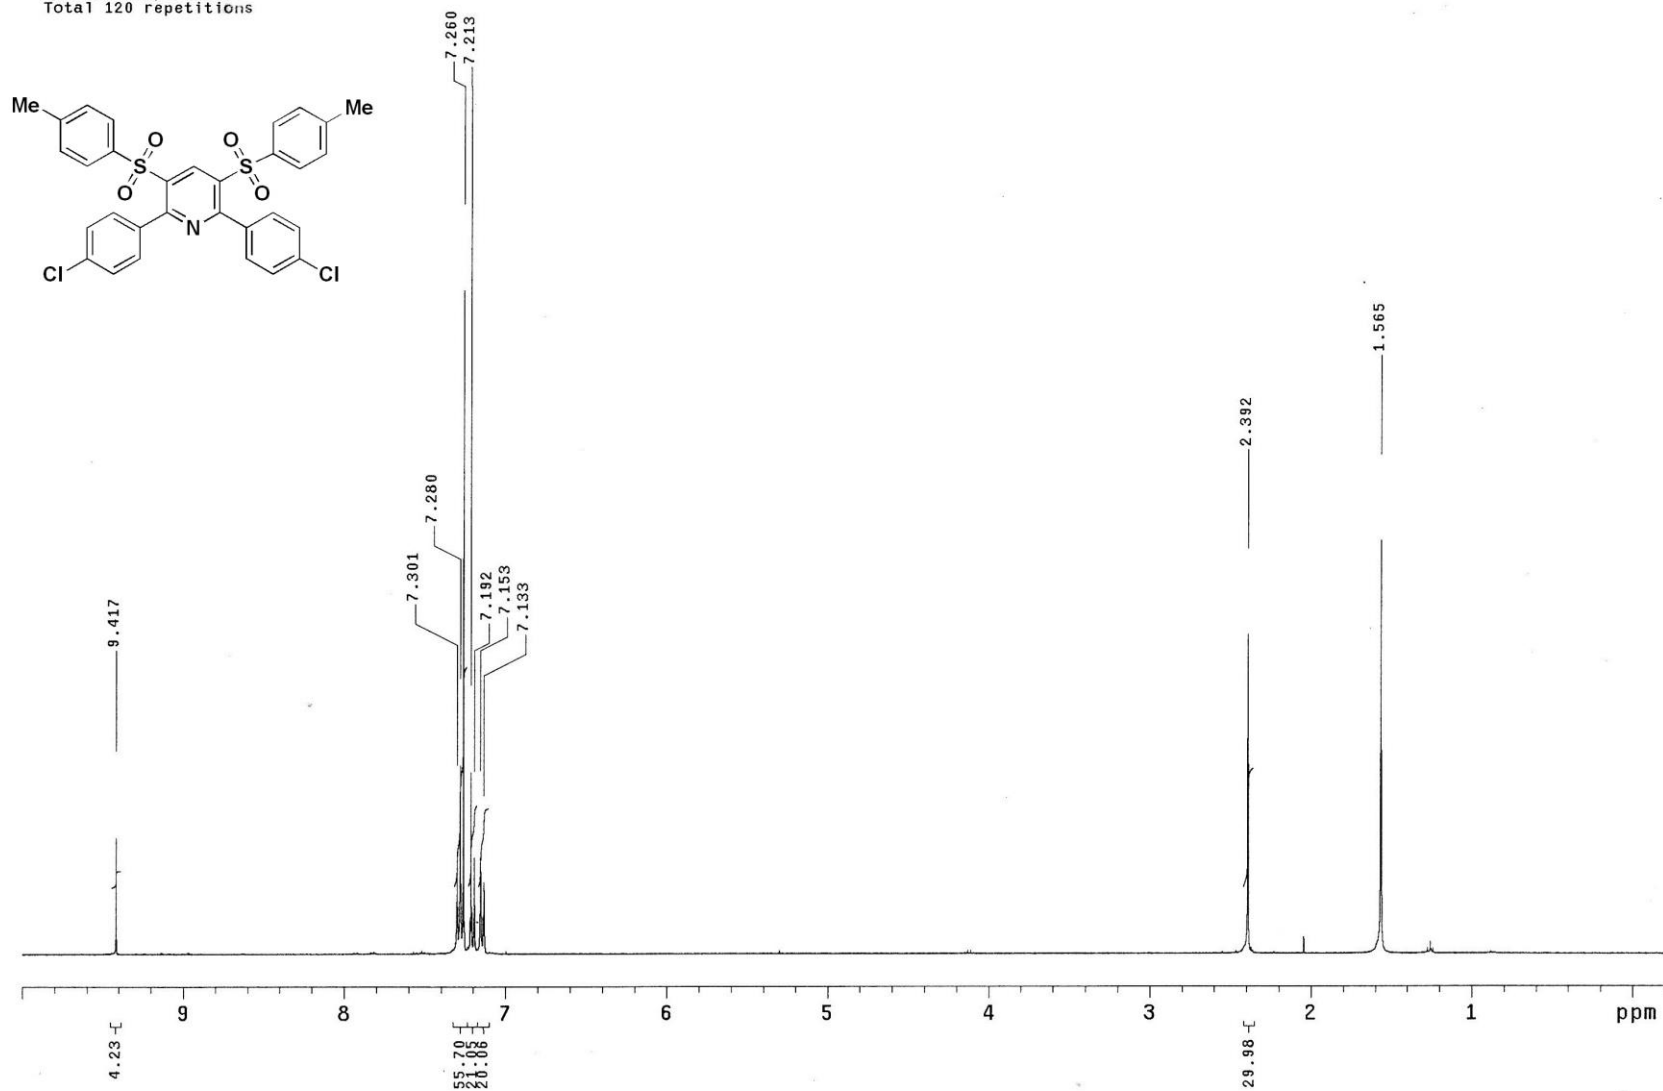

# Compound 4c (<sup>13</sup>C-NMR spectral data)

YCM3239

Pulse Sequence: s2pu1

UNITYplus-400 "unity400"

Date: Feb 7 2023

Solvent: CDCl<sub>3</sub>

Ambient temperature

Total 32160 repetitions

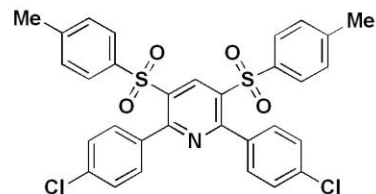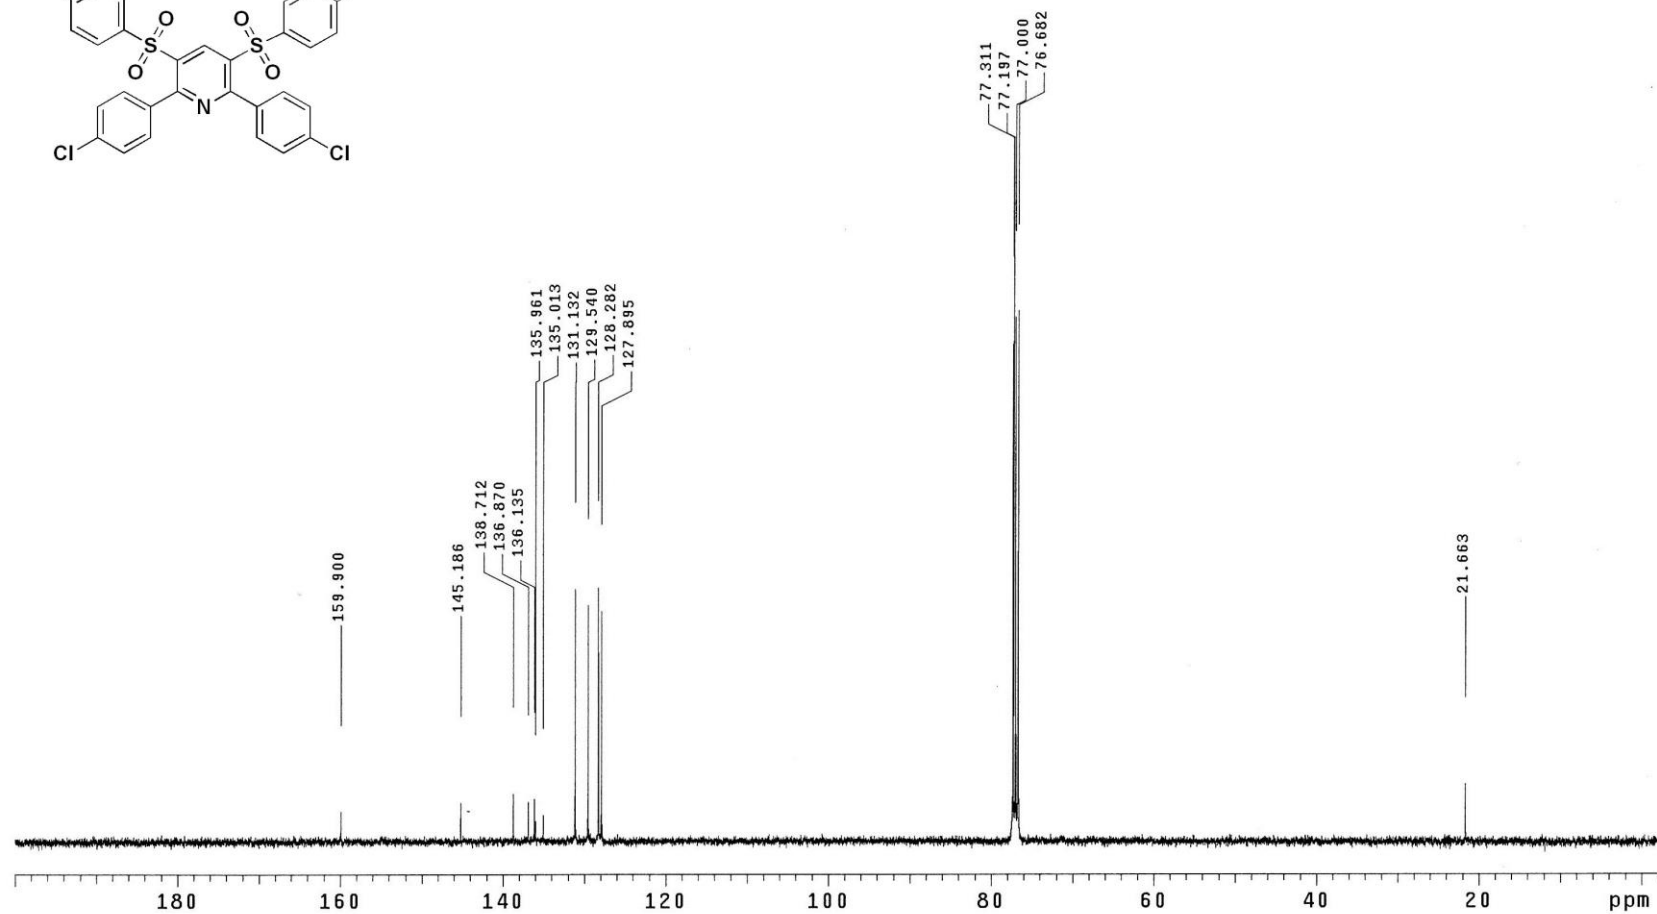



# Compound 4d (<sup>1</sup>H-NMR spectral data)

YCM1006

Pulse Sequence: s2pu1

UNITYplus-400 "unity400"

Date: Oct 6 2022

Solvent: CDCl<sub>3</sub>

Ambient temperature

Total 32 repetitions

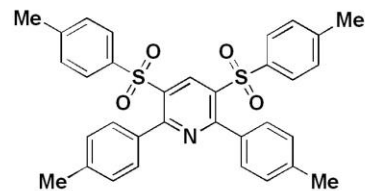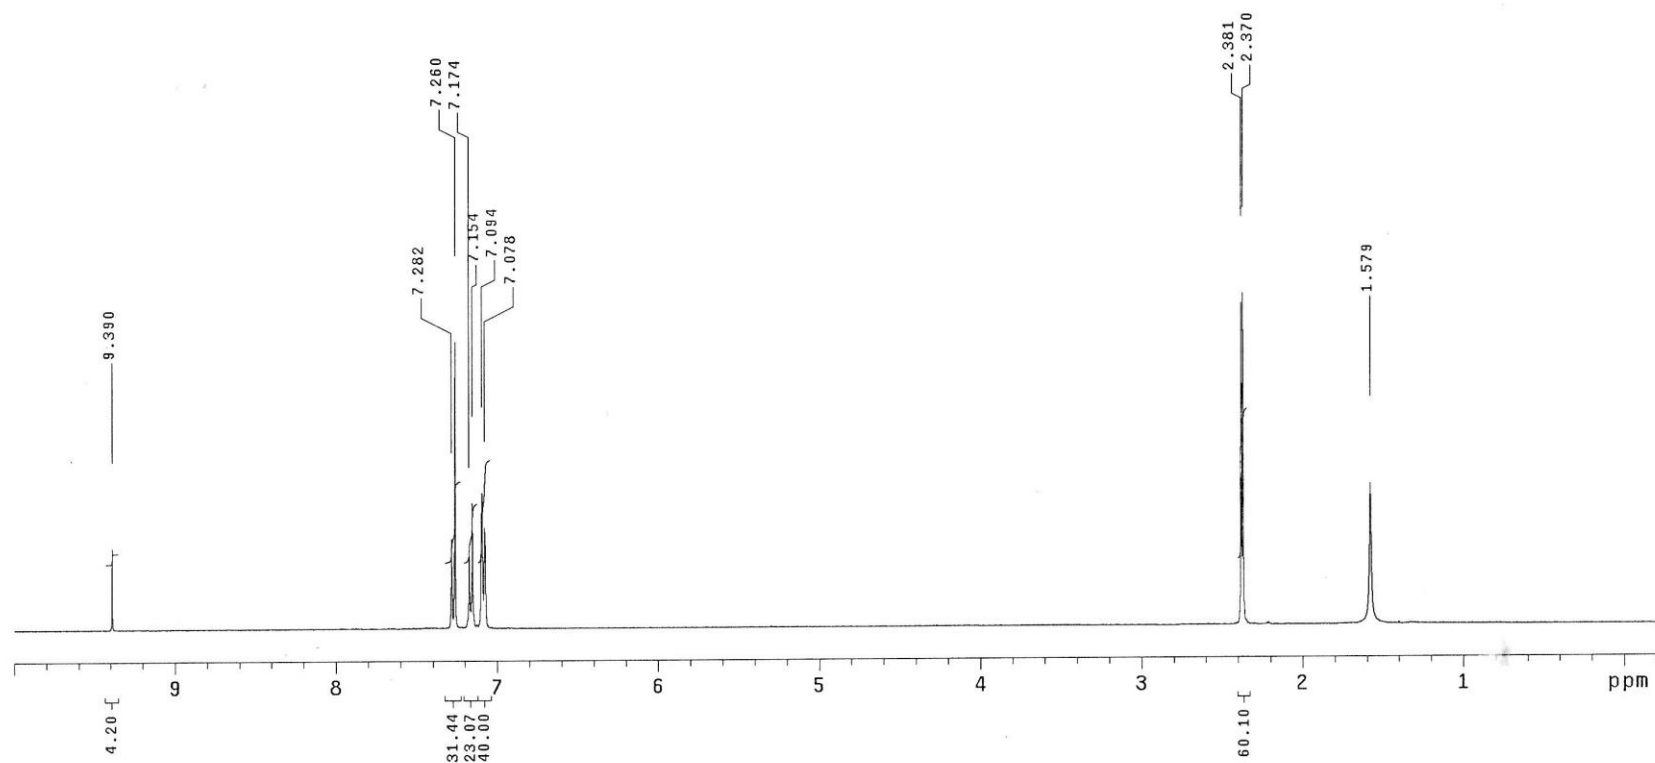

# Compound 4d (<sup>13</sup>C-NMR spectral data)

YCM1006

Pulse Sequence: s2pu1

UNITYplus-400 "unity400"

Date: Oct 6 2022

Solvent: CDCl<sub>3</sub>

Ambient temperature

Total 7056 repetitions

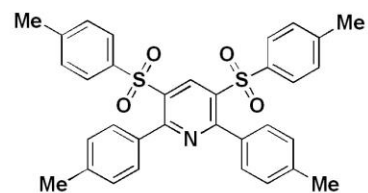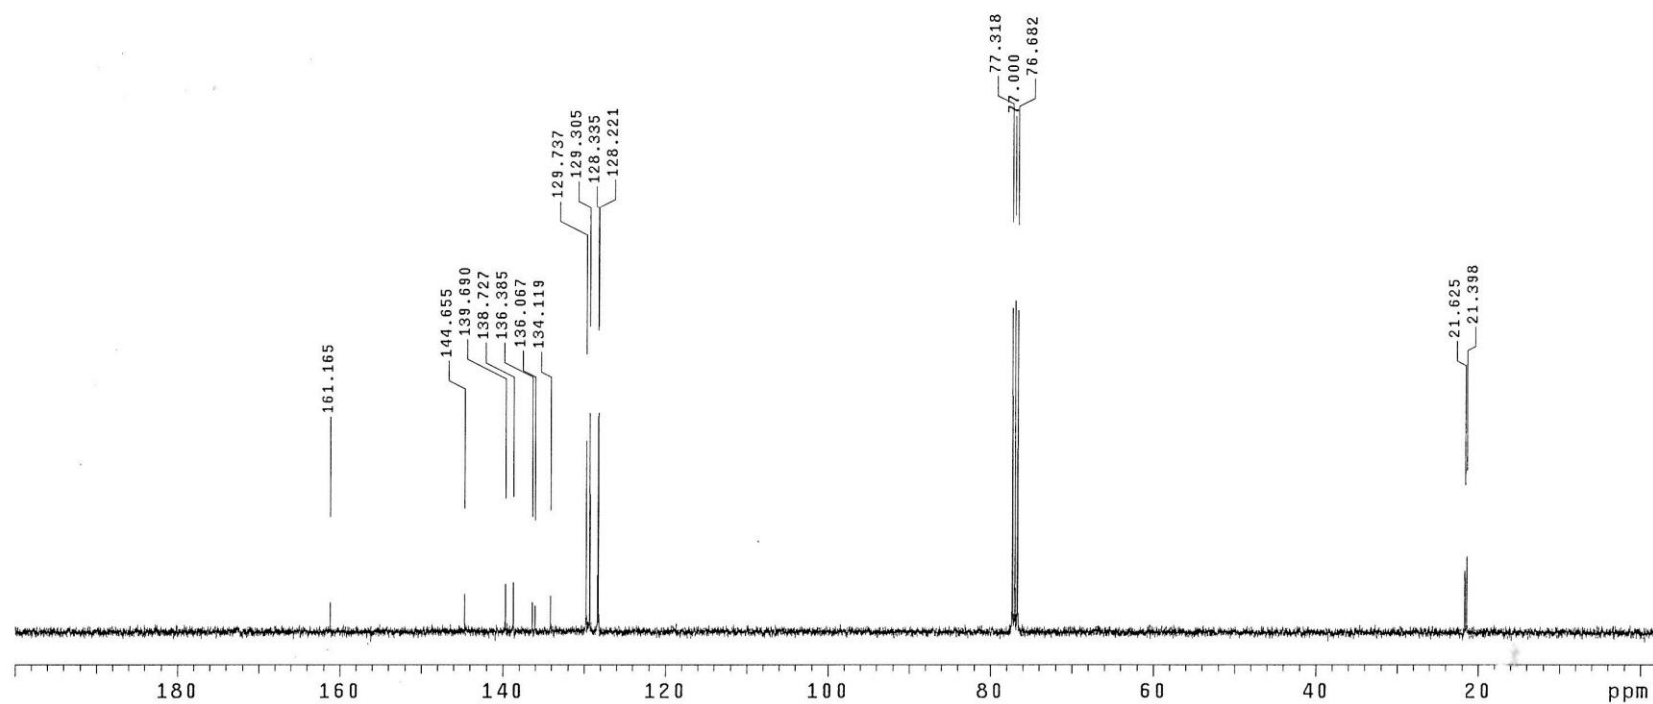

# Compound 4e (<sup>1</sup>H-NMR spectral data)

Pulse Sequence: s2pu1  
UNITYplus-600 "KMU600.kmu.edu.tw"  
Date: Sep 22 2022  
Solvent: cdc13  
Temp. 28.0 C / 301.1 K  
Total 32 repetitions

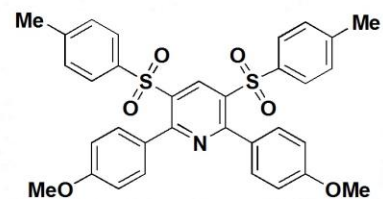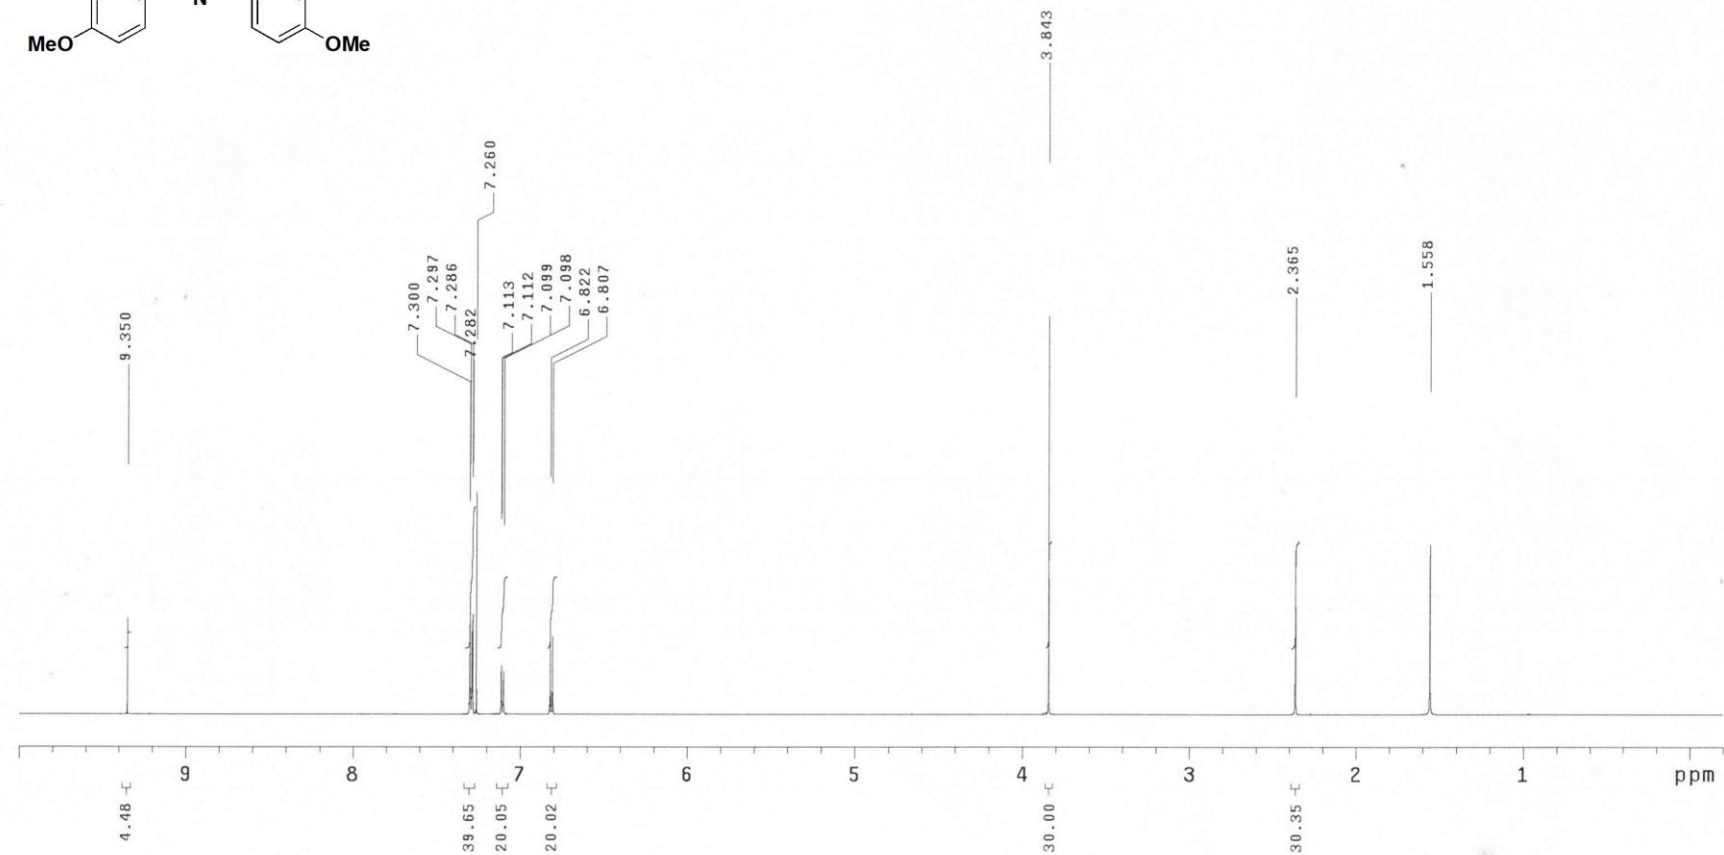

# Compound 4e (<sup>13</sup>C-NMR spectral data)

Pulse Sequence: s2pu1  
 UNITYplus-600 "KMU600.kmu.edu.tw"  
 Date: Sep 22 2022  
 Solvent: cdcl3  
 Temp. 28.0 C / 301.1 K  
 Total 544 repetitions

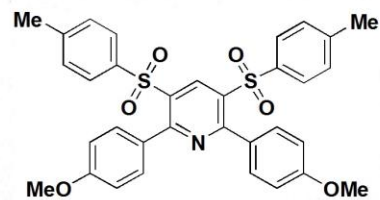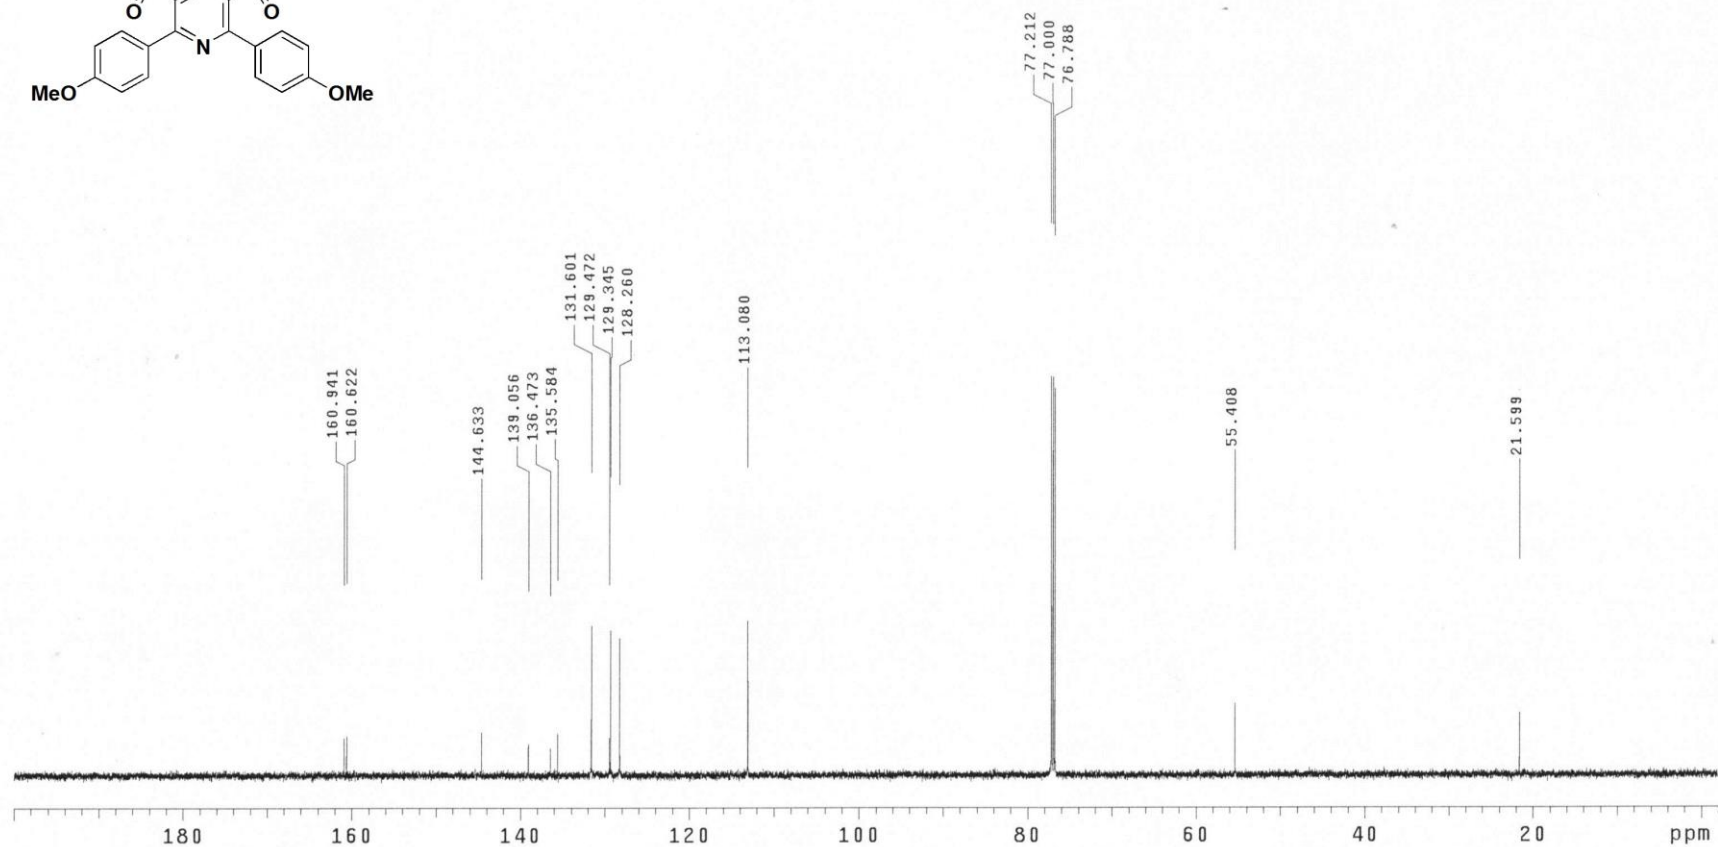

# Compound 4f (<sup>1</sup>H-NMR spectral data)

YCM1005

Pulse Sequence: s2pu1  
 UNITYplus-400 "unity400"  
 Date: Oct 5 2022  
 Solvent: CDCl<sub>3</sub>  
 Ambient temperature  
 Total 32 repetitions

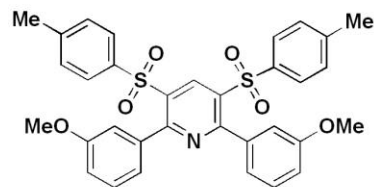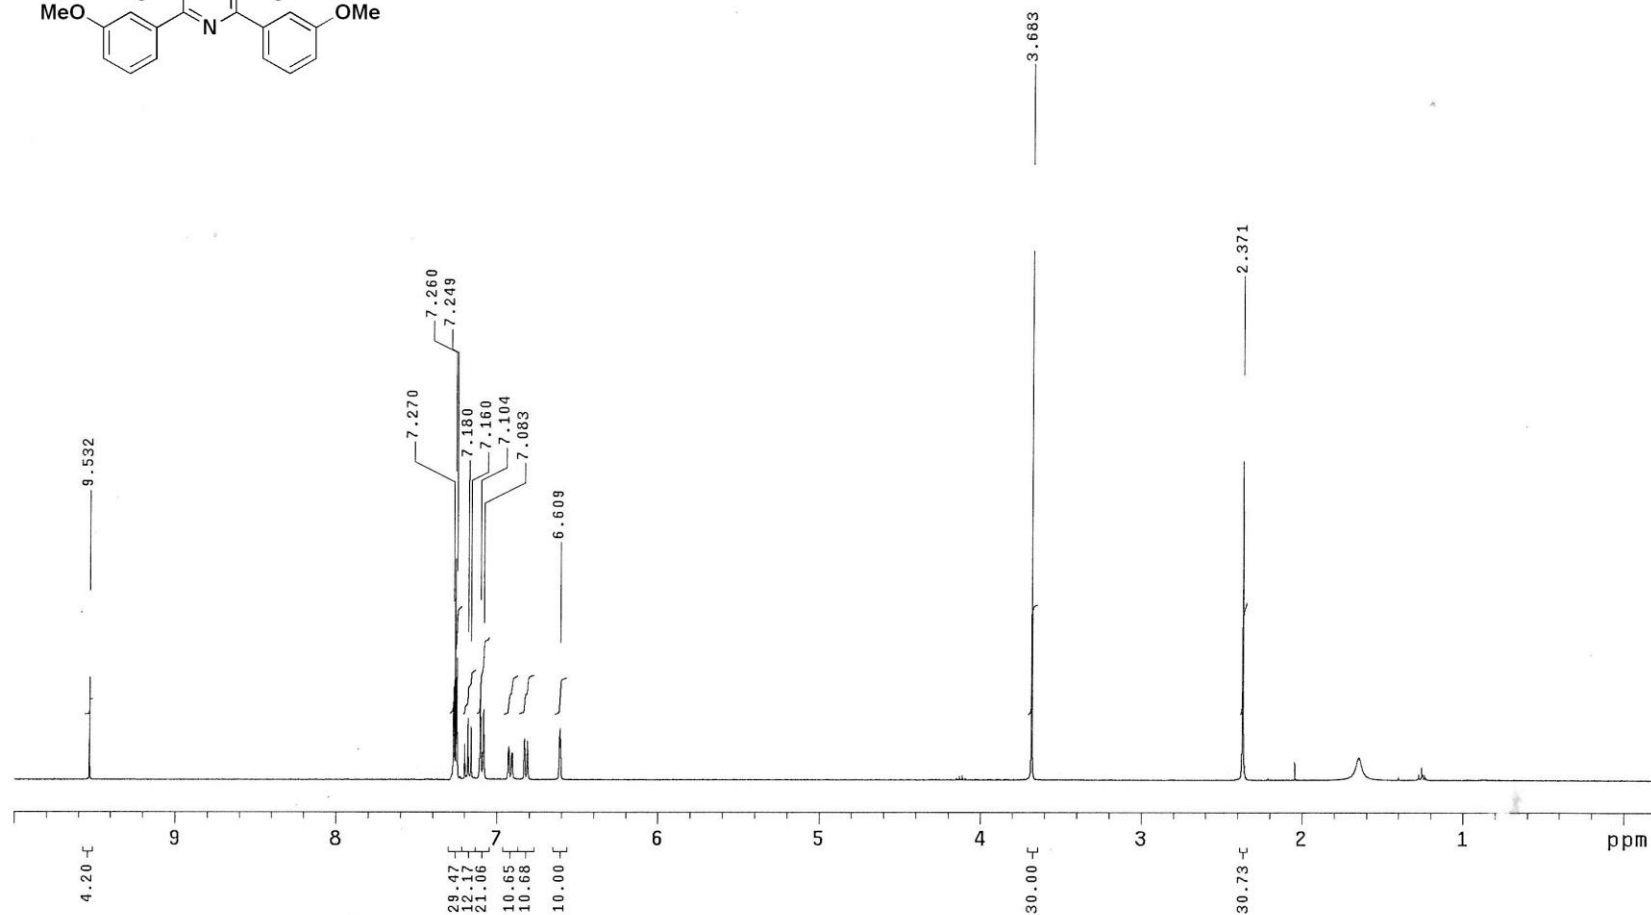

# Compound 4f (<sup>13</sup>C-NMR spectral data)

YCM1005

Pulse Sequence: s2pu1

UNITYplus-400 "unity400"

Date: Oct 5 2022

Solvent: CDCl<sub>3</sub>

Ambient temperature

Total 7200 repetitions

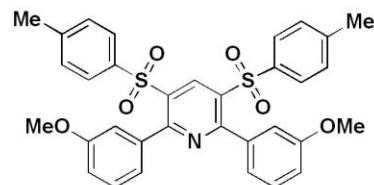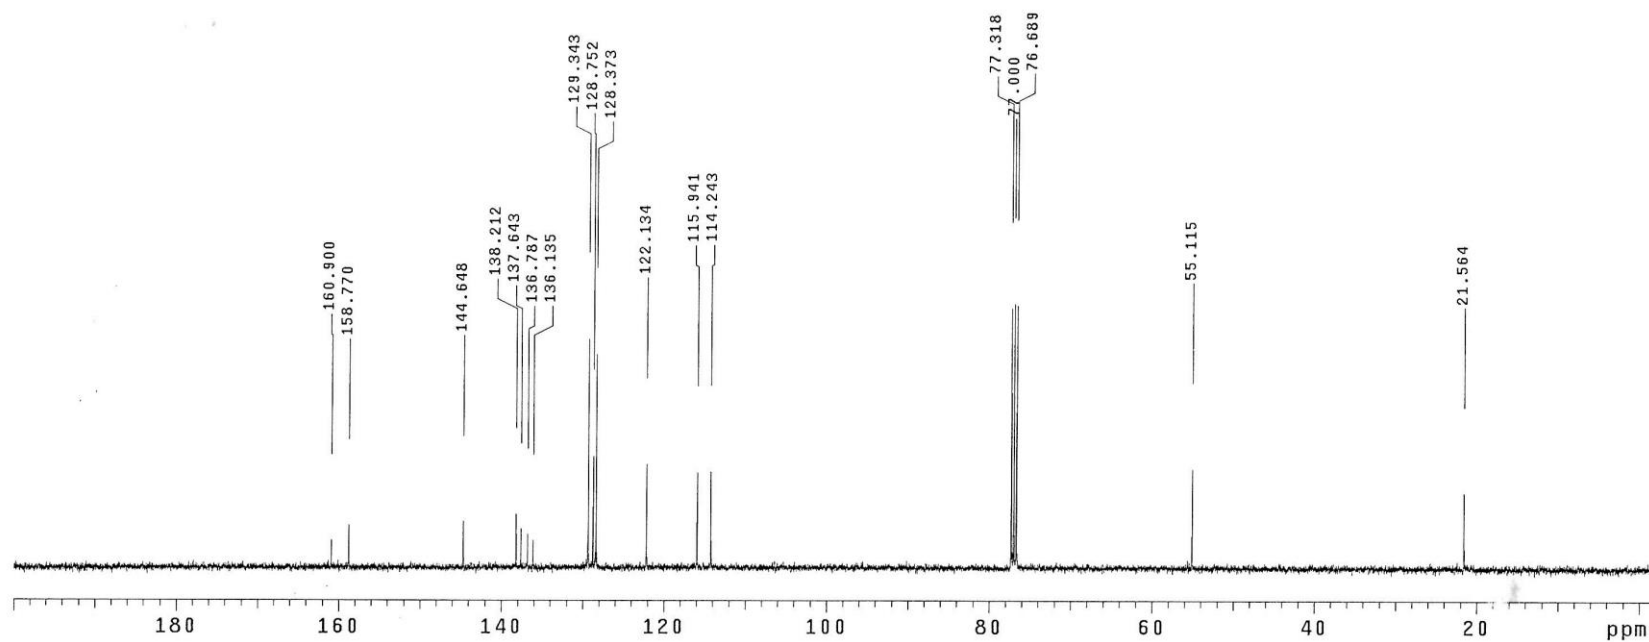

# Compound 4g (<sup>1</sup>H-NMR spectral data)

YCM2327

Pulse Sequence: s2pu1

Mercury-400BB "MerPlus400"

Date: Jan 9 2023

Solvent: cdcl3

Ambient temperature

Total 32 repetitions

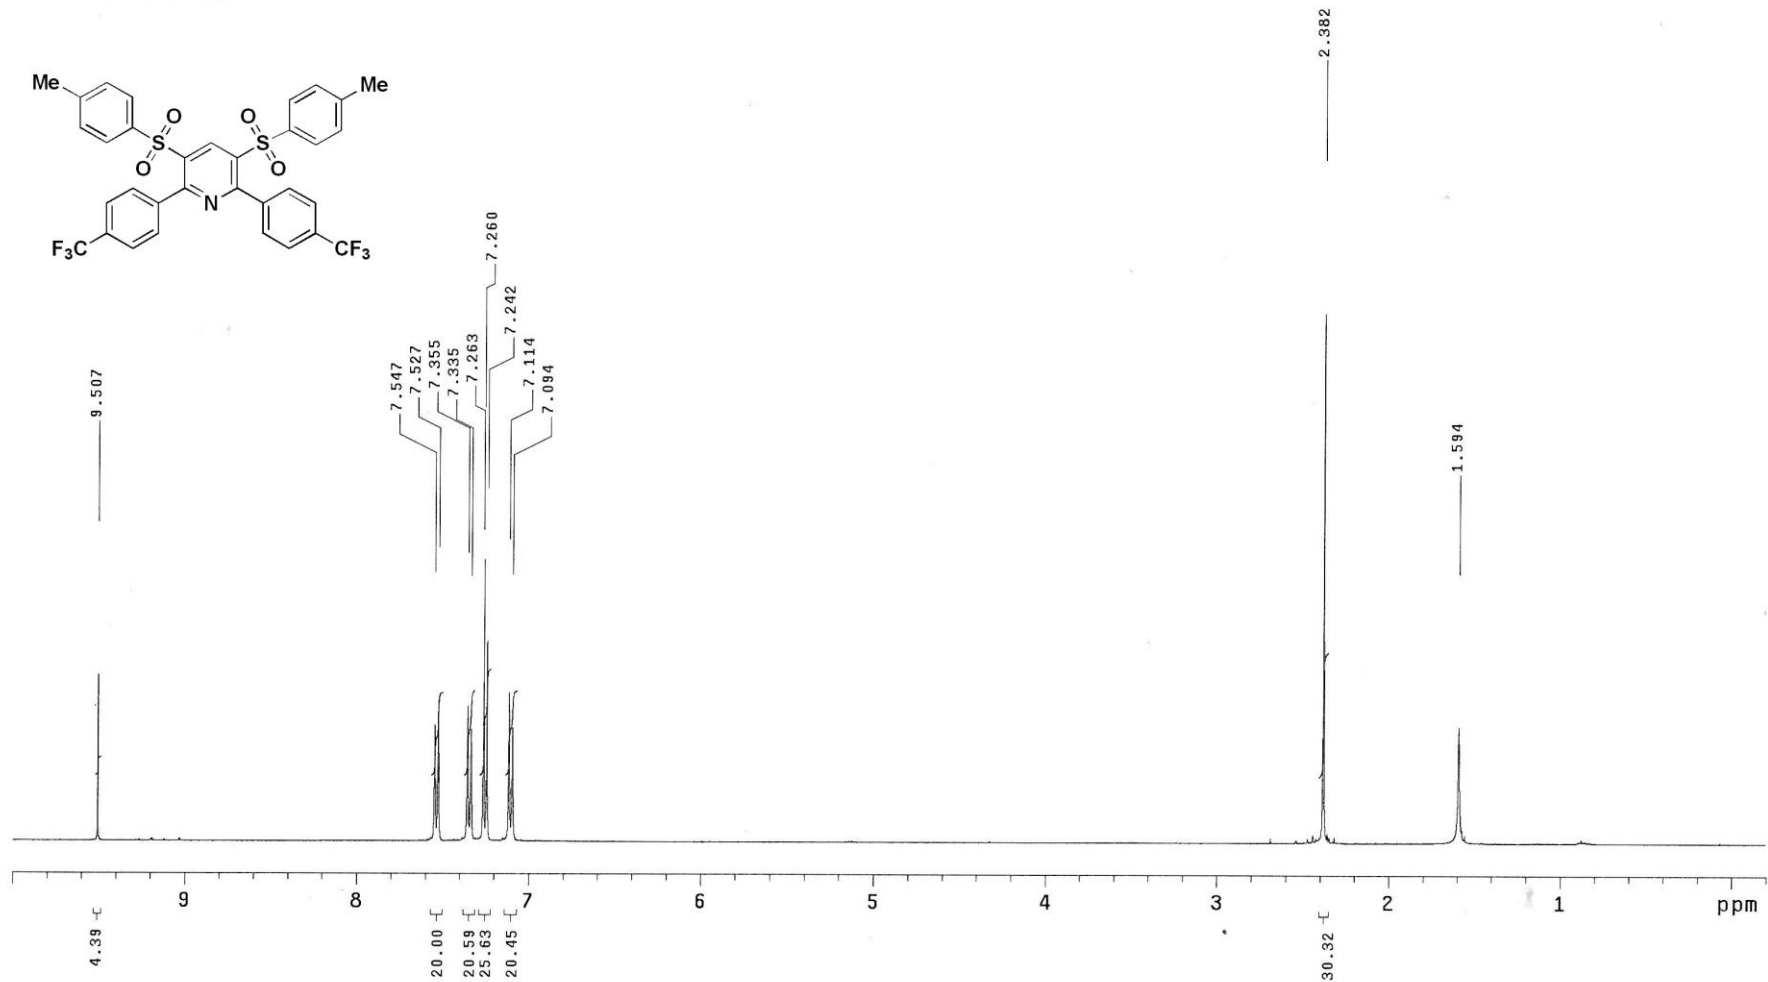

# Compound 4g (<sup>13</sup>C-NMR spectral data)

YCM2327

Pulse Sequence: s2pu1

Mercury-400BB "MerPlus400"

Date: Jan 9 2023

Solvent: cdc13

Ambient temperature

Total 3408 repetitions

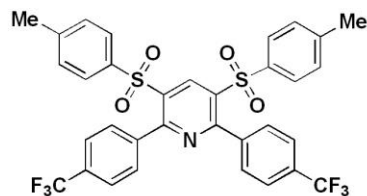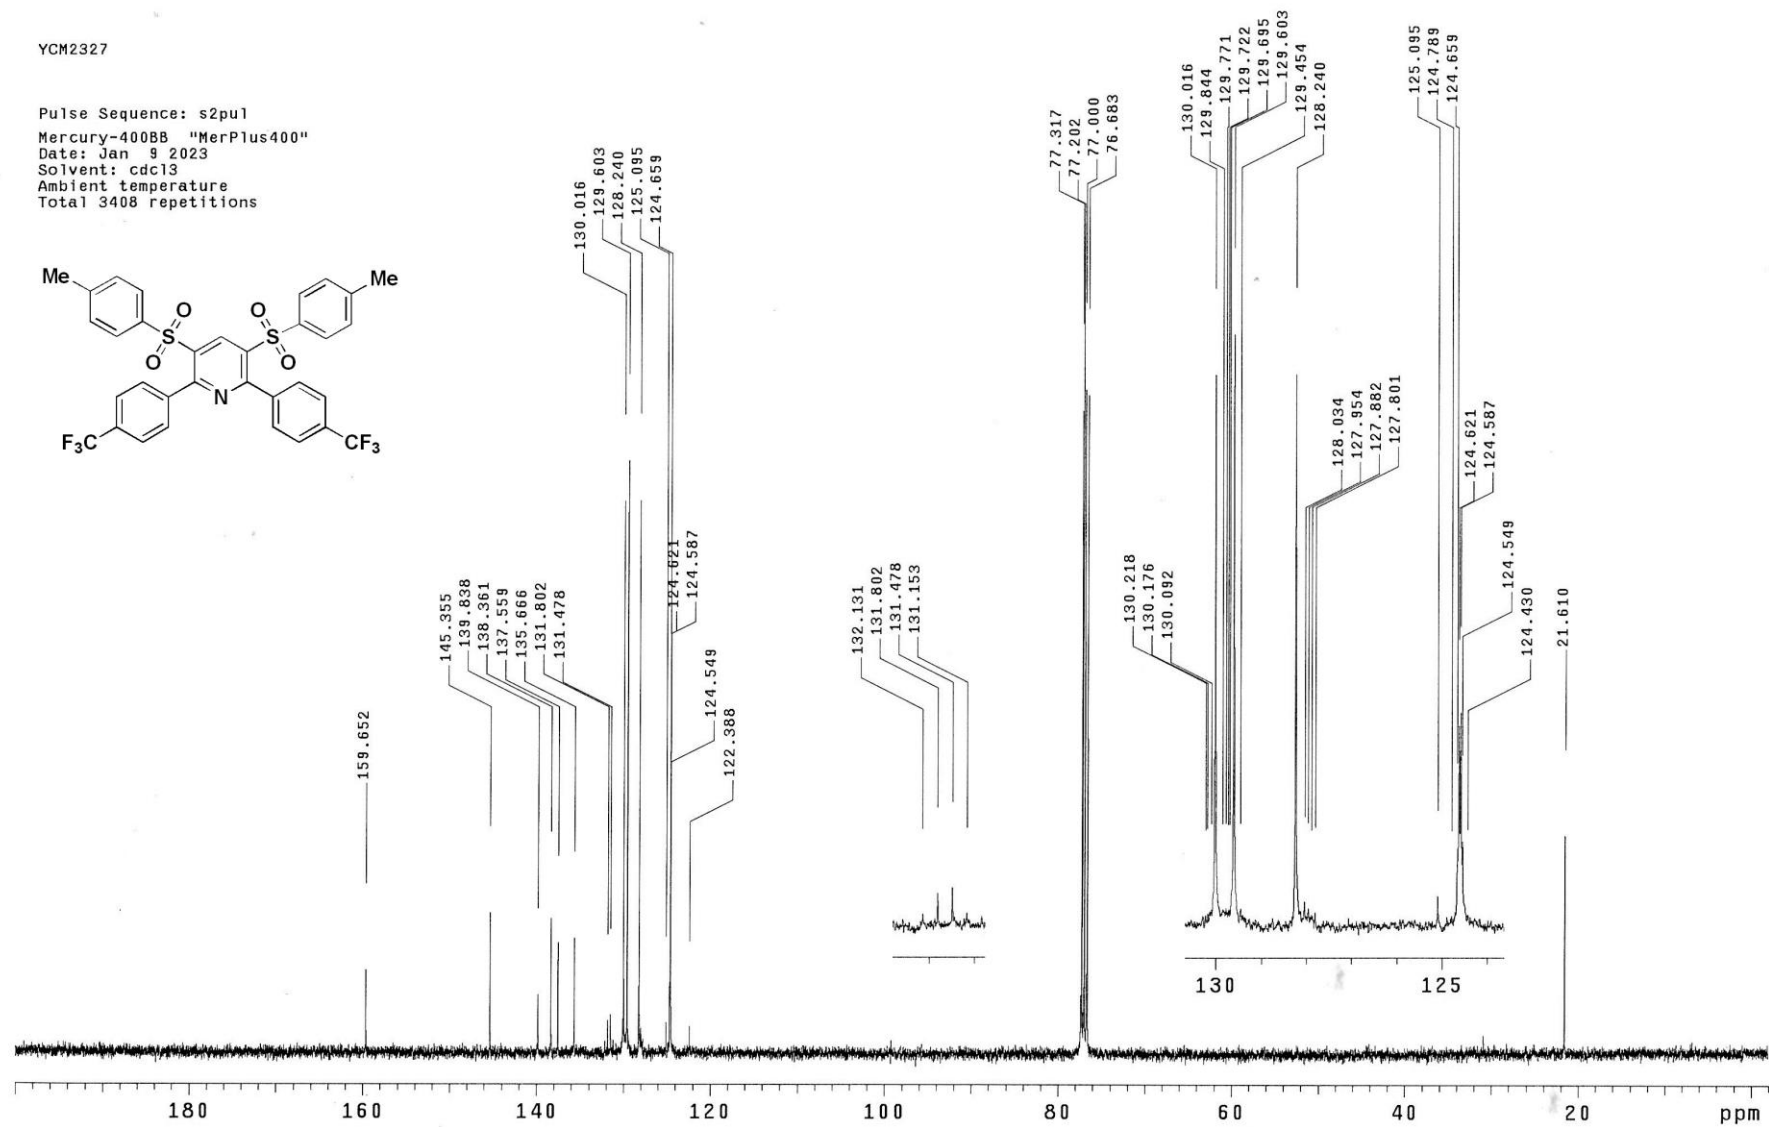



# Compound 4g (<sup>19</sup>F-NMR spectral data)

4g

Pulse Sequence: s2pu1,  
Mercury-400BB "MerPlus400"  
Date: Aug 5 2024  
Solvent: cdcl3  
Ambient temperature  
Total 64 repetitions

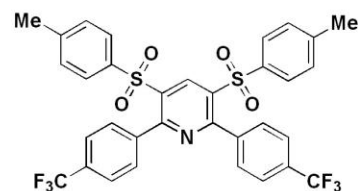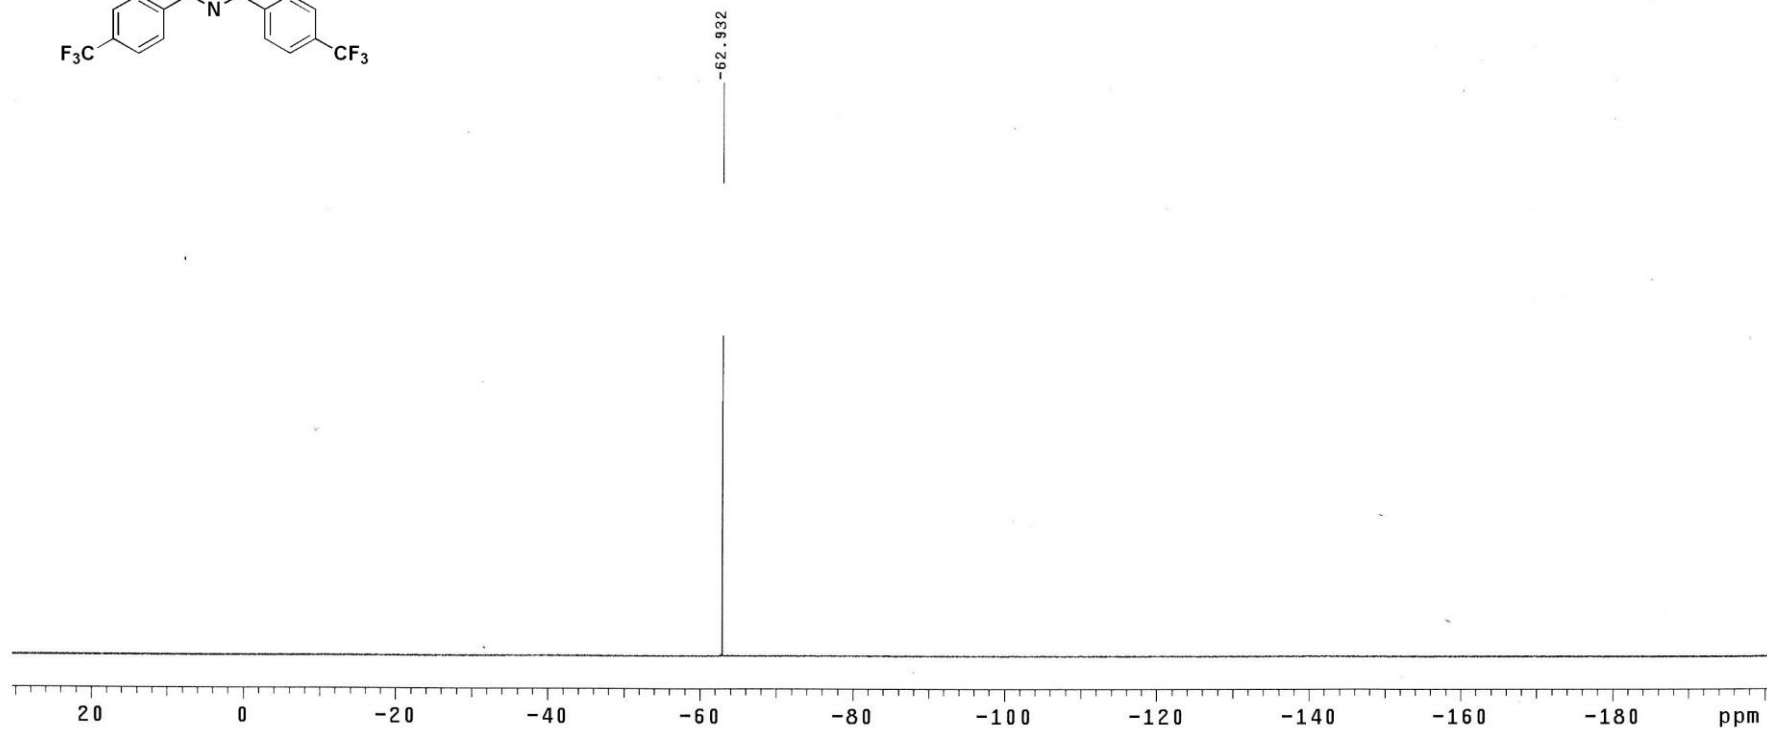

# Compound 4h (<sup>1</sup>H-NMR spectral data)

YCM9196

Pulse Sequence: s2pu1  
 UNITYplus-600 "KMU600.kmu.edu.tw"  
 Date: Jan 12 2023  
 Solvent: cdc13  
 Ambient temperature  
 Total 64 repetitions

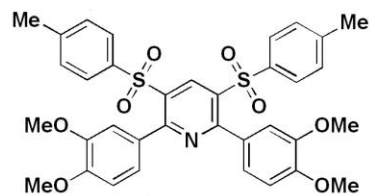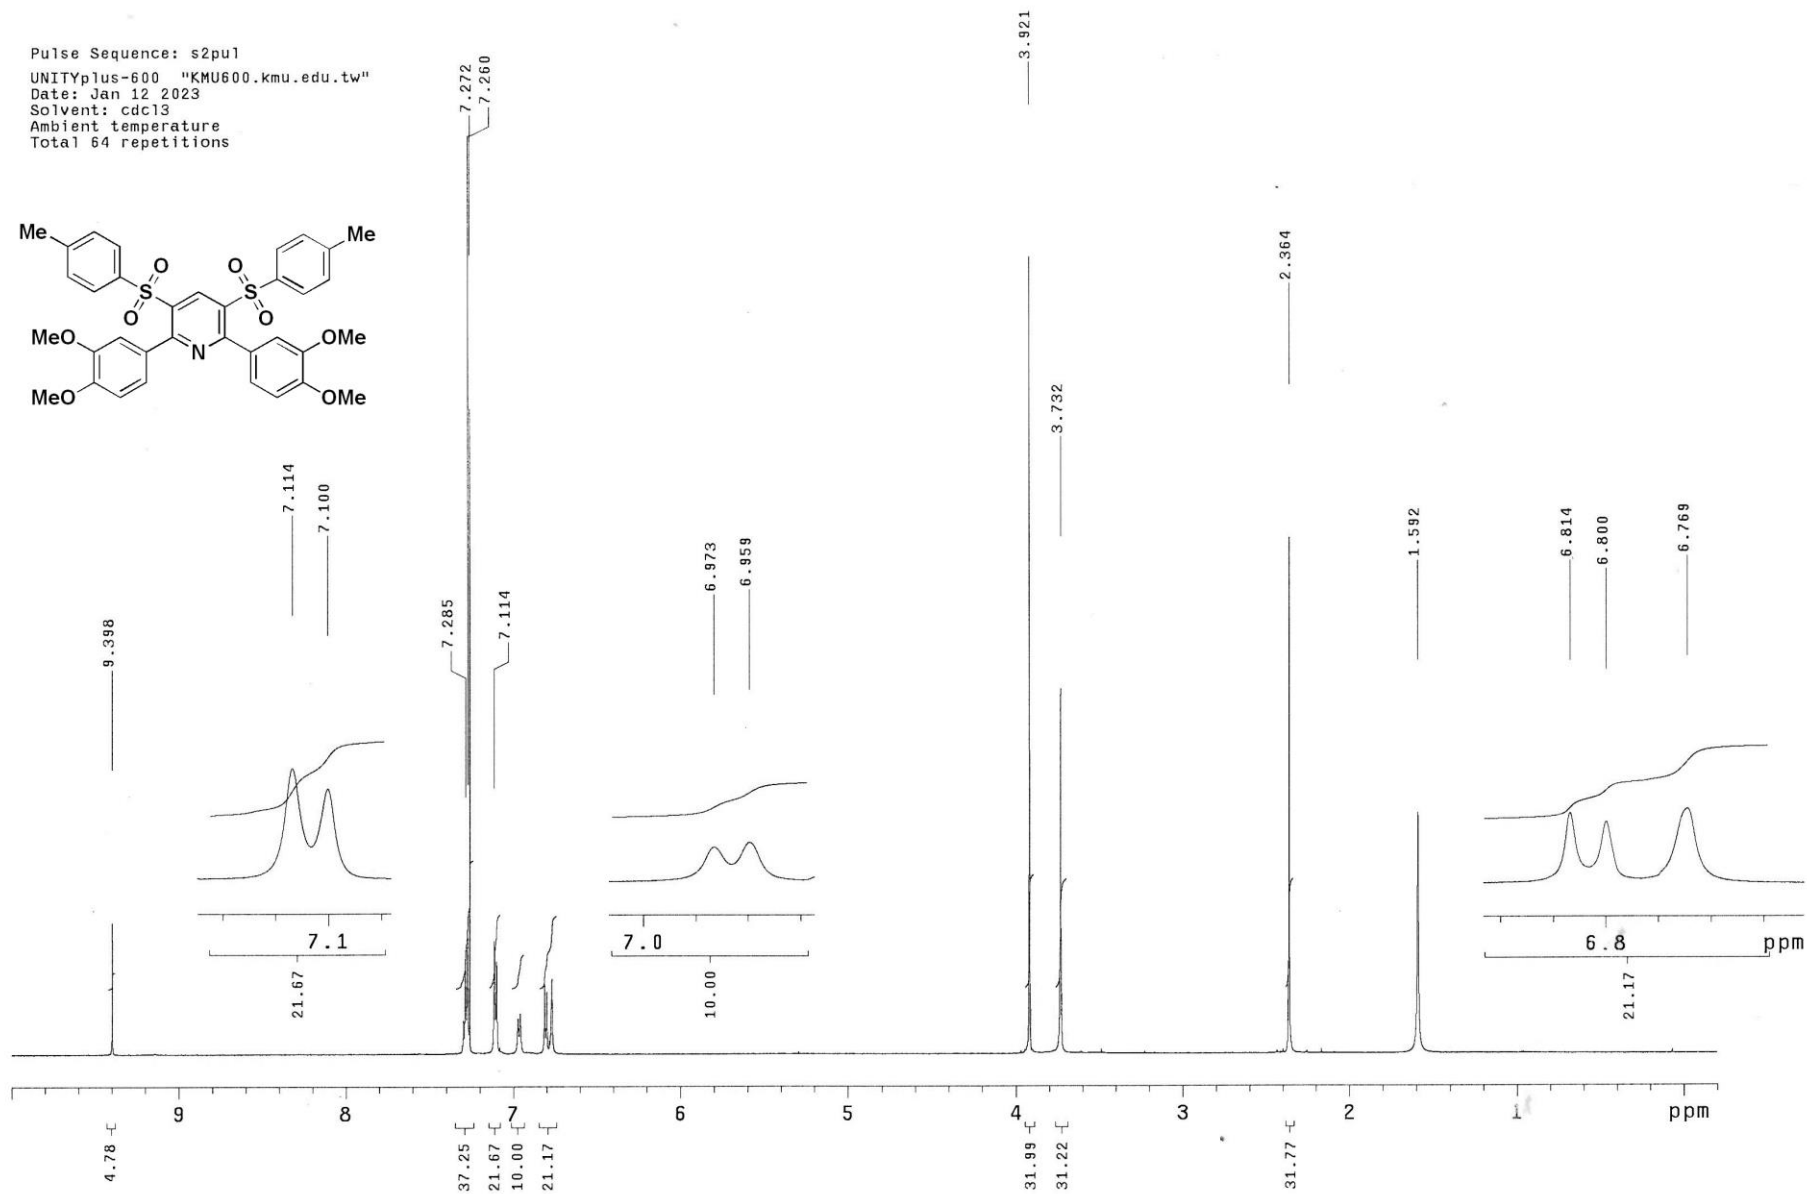

# Compound 4h (<sup>13</sup>C-NMR spectral data)

YCM9196

Pulse Sequence: s2pu1

UNITYplus-600 "KMU600.kmu.edu.tw"

Date: Jan 12 2023

Solvent: cdc13

Ambient temperature

Total 3784 repetitions

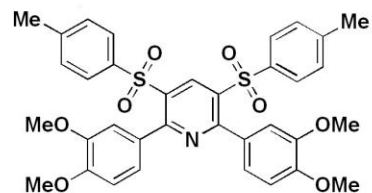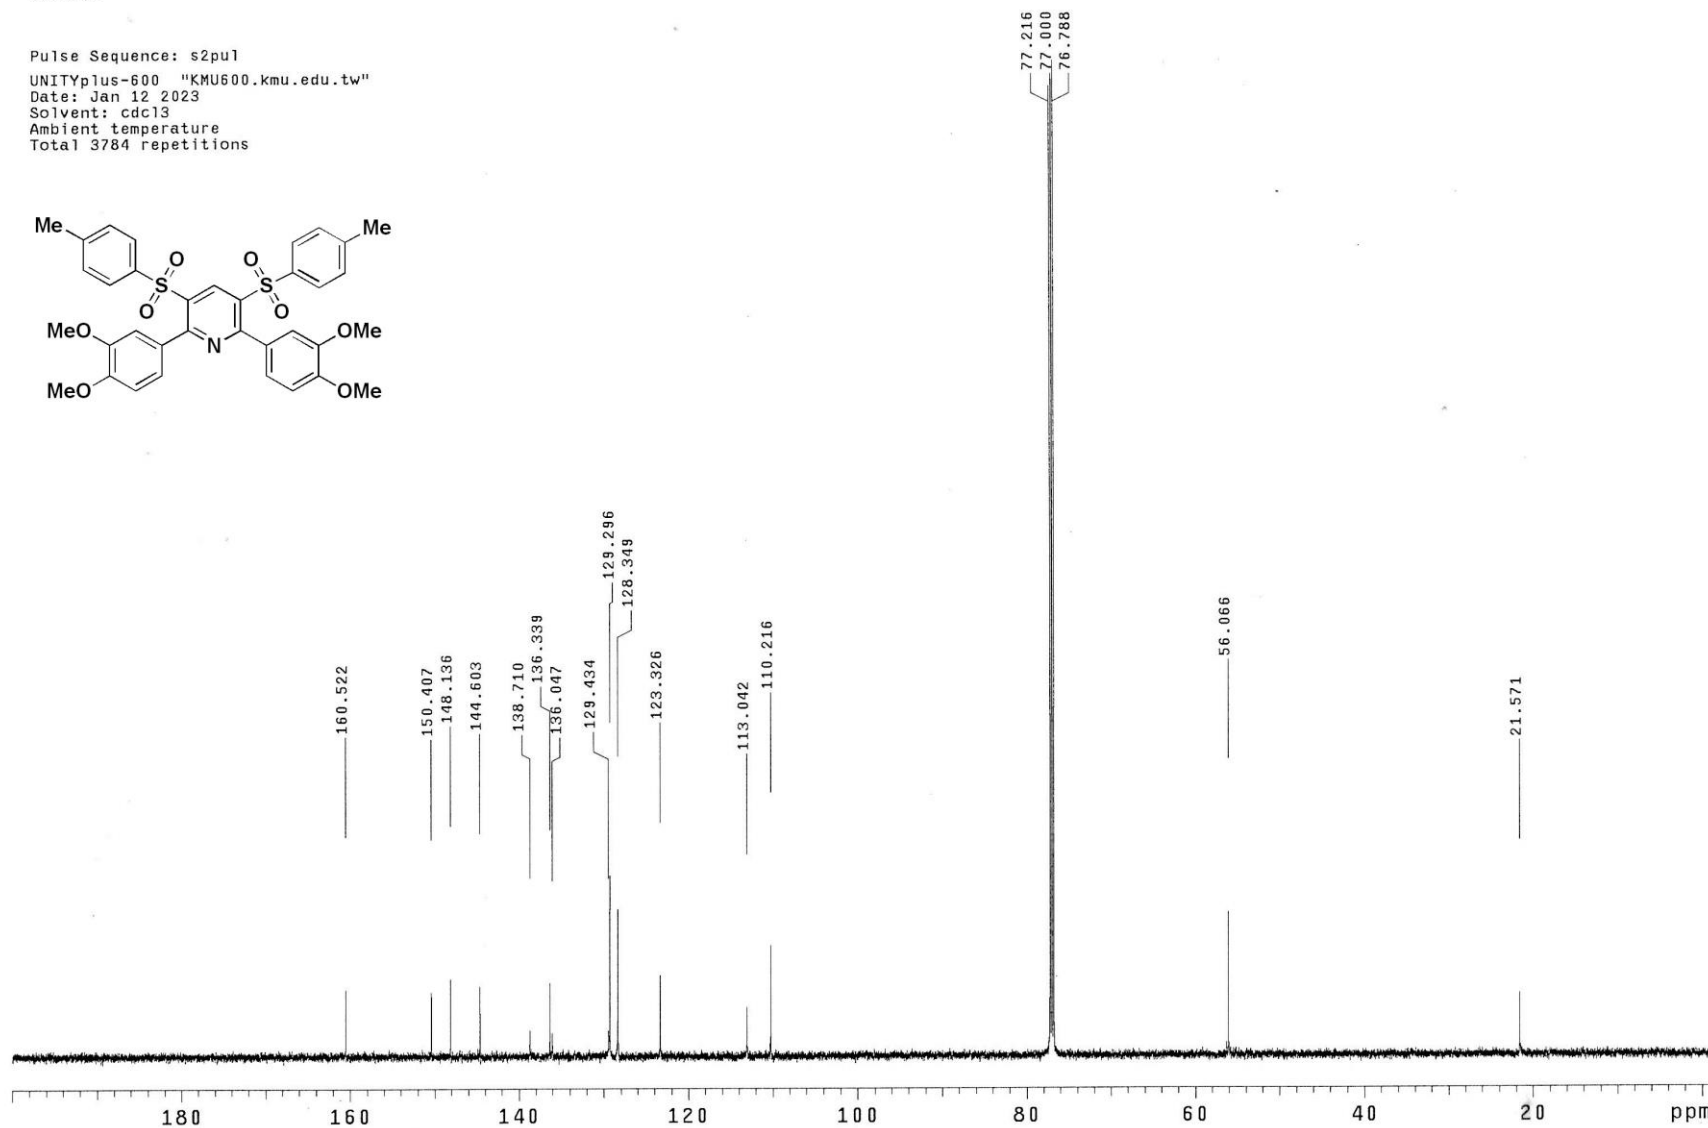

# Compound 4i (<sup>1</sup>H-NMR spectral data)

YCM3235

Pulse Sequence: s2pu1  
 UNITYplus-600 "KMU600.kmu.edu.tw"  
 Date: Nov 7 2022  
 Solvent: cdc13  
 Temp. 28.0 C / 301.1 K  
 Total 40 repetitions

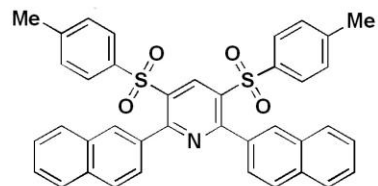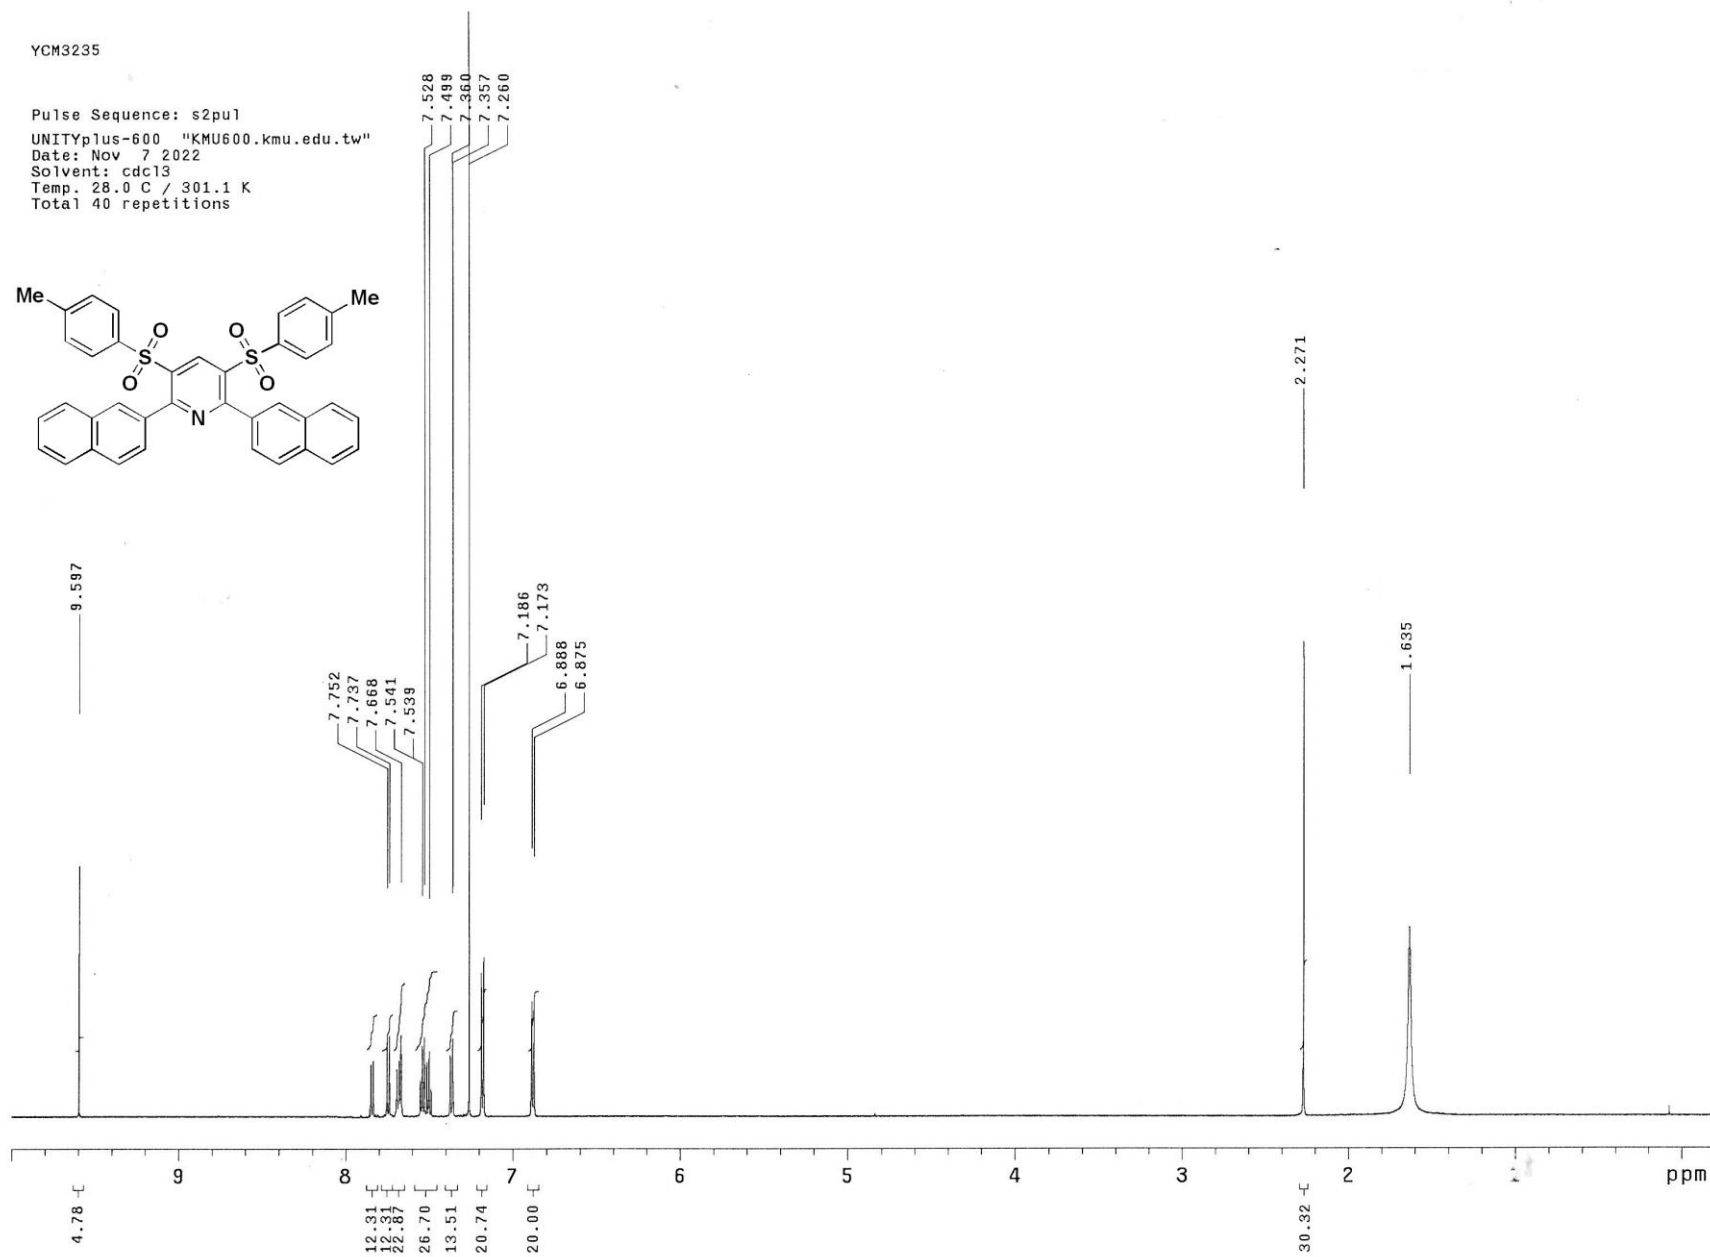

# Compound 4i (<sup>13</sup>C-NMR spectral data)

YCM3235

Pulse Sequence: s2pu1  
UNITYplus-600 "KMU600.kmu.edu.tw"  
Date: Nov 7 2022  
Solvent: cdc13  
Temp. 28.0 C / 301.1 K  
Total 46616 repetitions

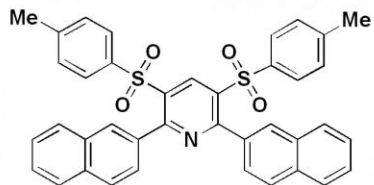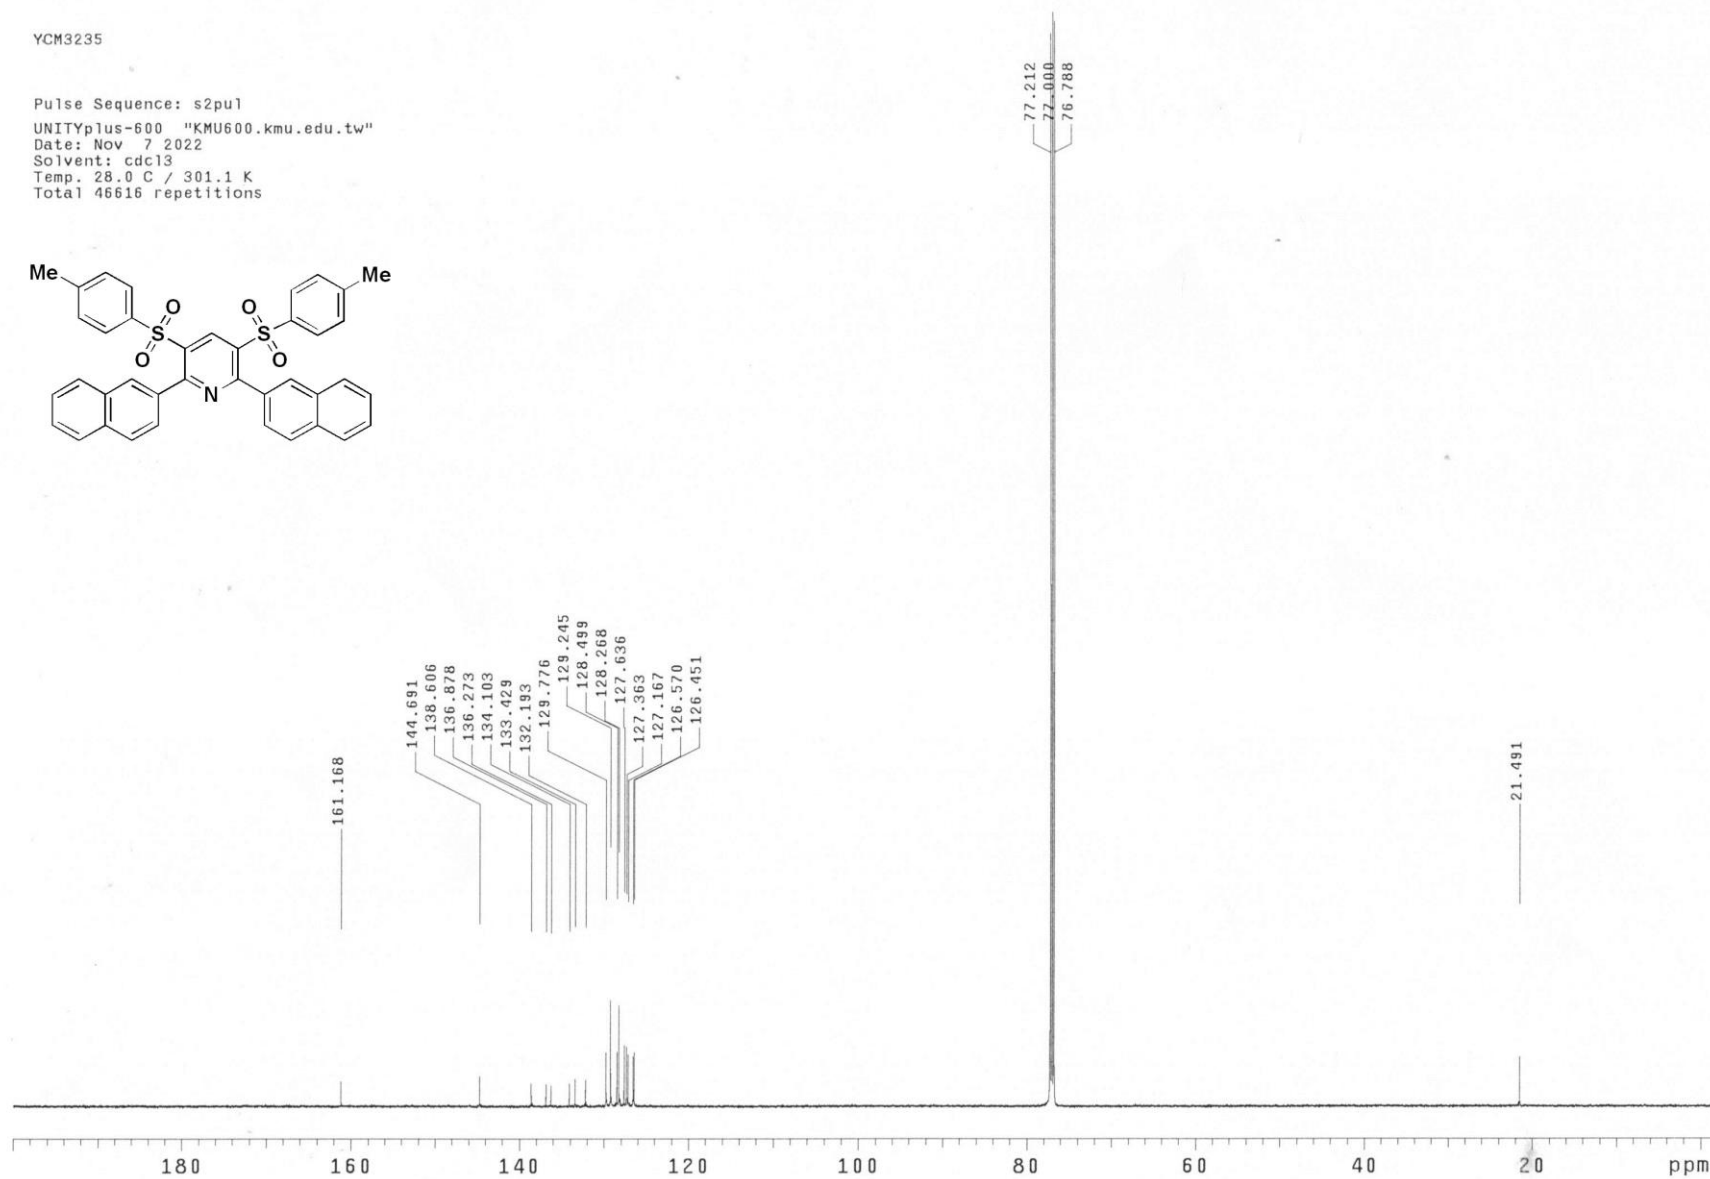

# Compound 4j (<sup>1</sup>H-NMR spectral data)

YCM1625

Pulse Sequence: s2pu1

UNITYplus-400 "unity400"

Date: Sep 15 2022

Solvent: CDCl<sub>3</sub>

Ambient temperature

Total 32 repetitions

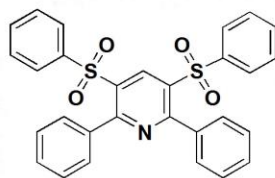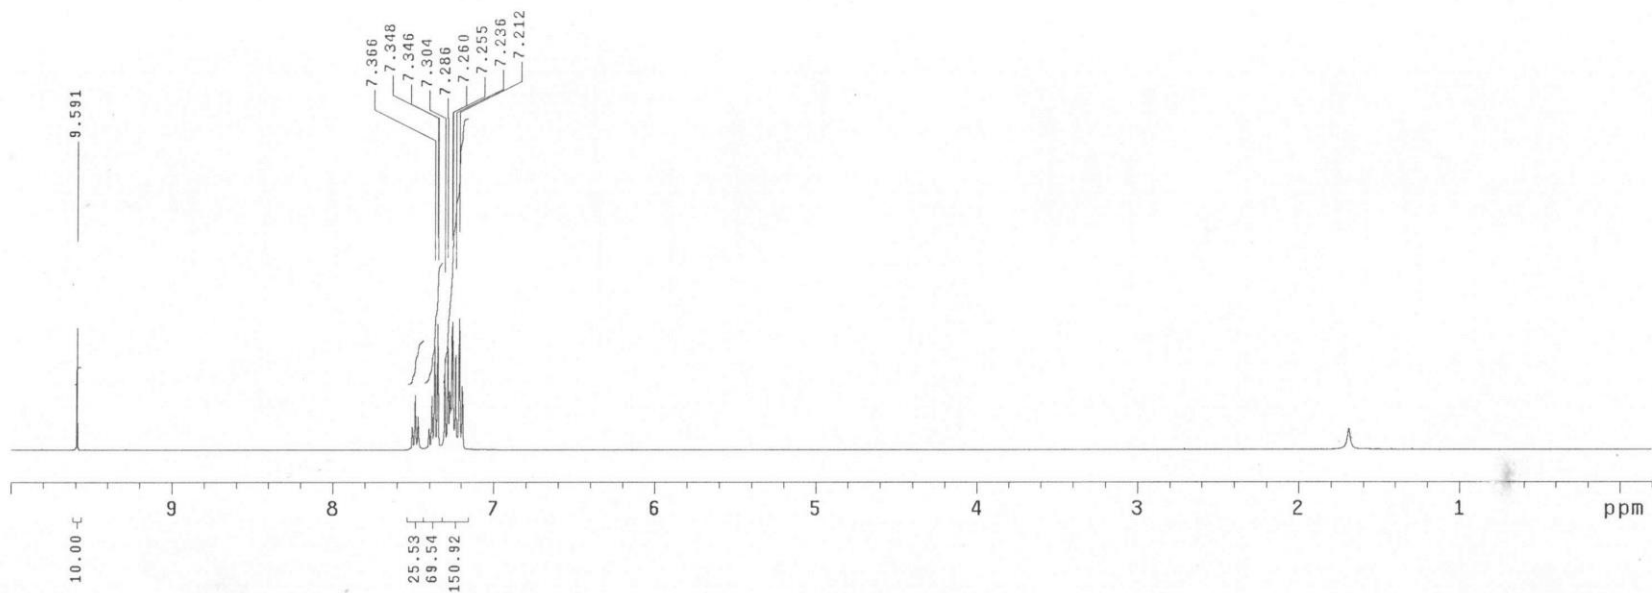

# Compound 4j (<sup>13</sup>C-NMR spectral data)

YCM1625

Pulse Sequence: s2pu1  
UNITYplus-400 "unity400"  
Date: Sep 15 2022  
Solvent: CDCl<sub>3</sub>  
Ambient temperature  
Total 2016 repetitions

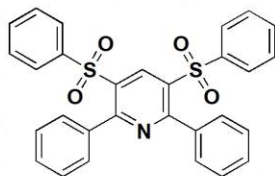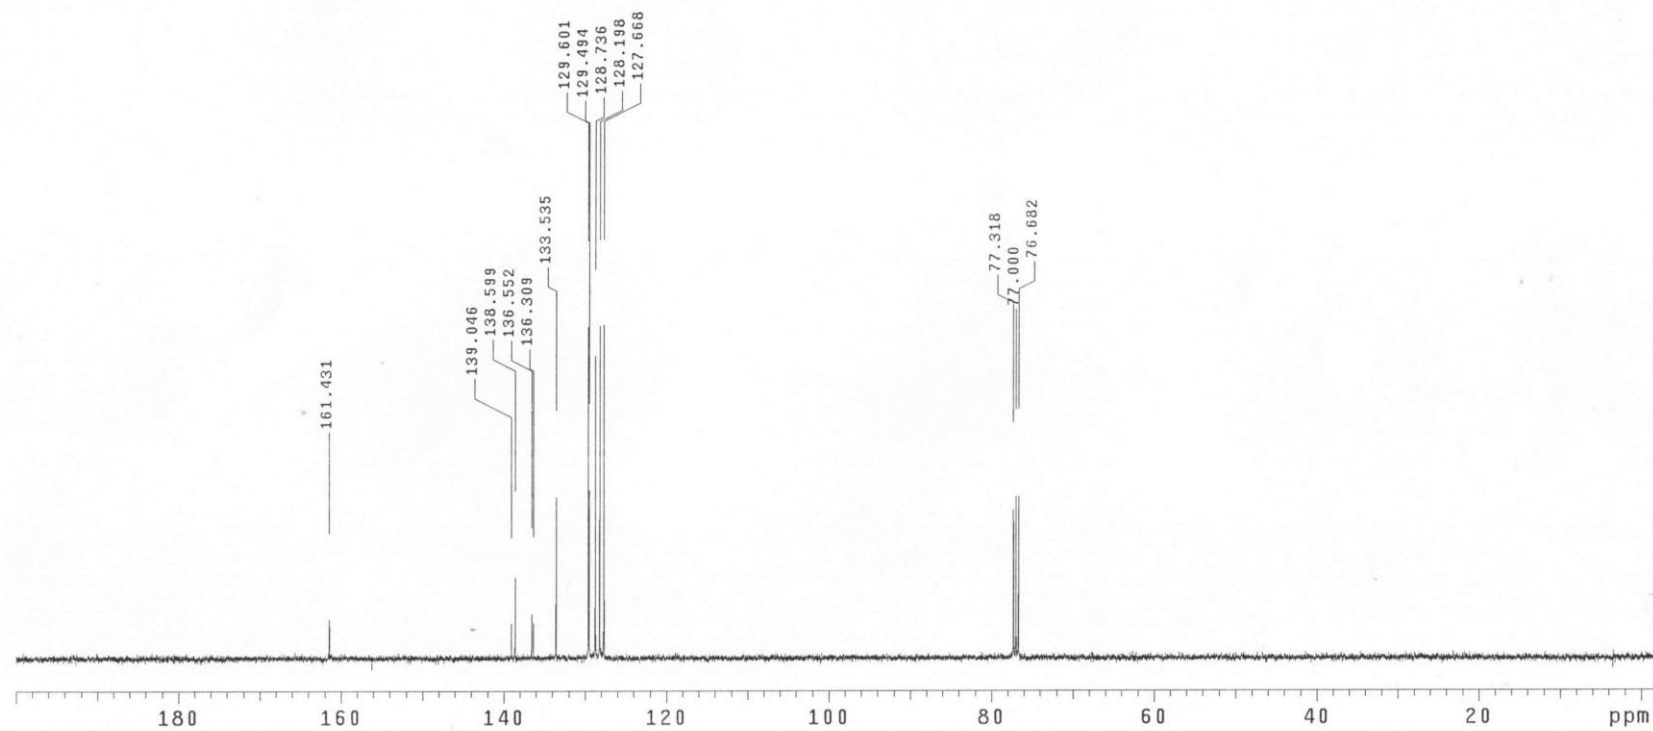

# Compound 4k (<sup>1</sup>H-NMR spectral data)

YCM5670

Pulse Sequence: s2pu1

UNITYplus-400 "unity400"

Date: Nov 7 2022

Solvent: CDCl<sub>3</sub>

Ambient temperature

Total 32 repetitions

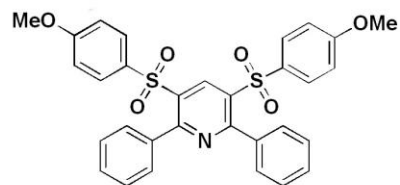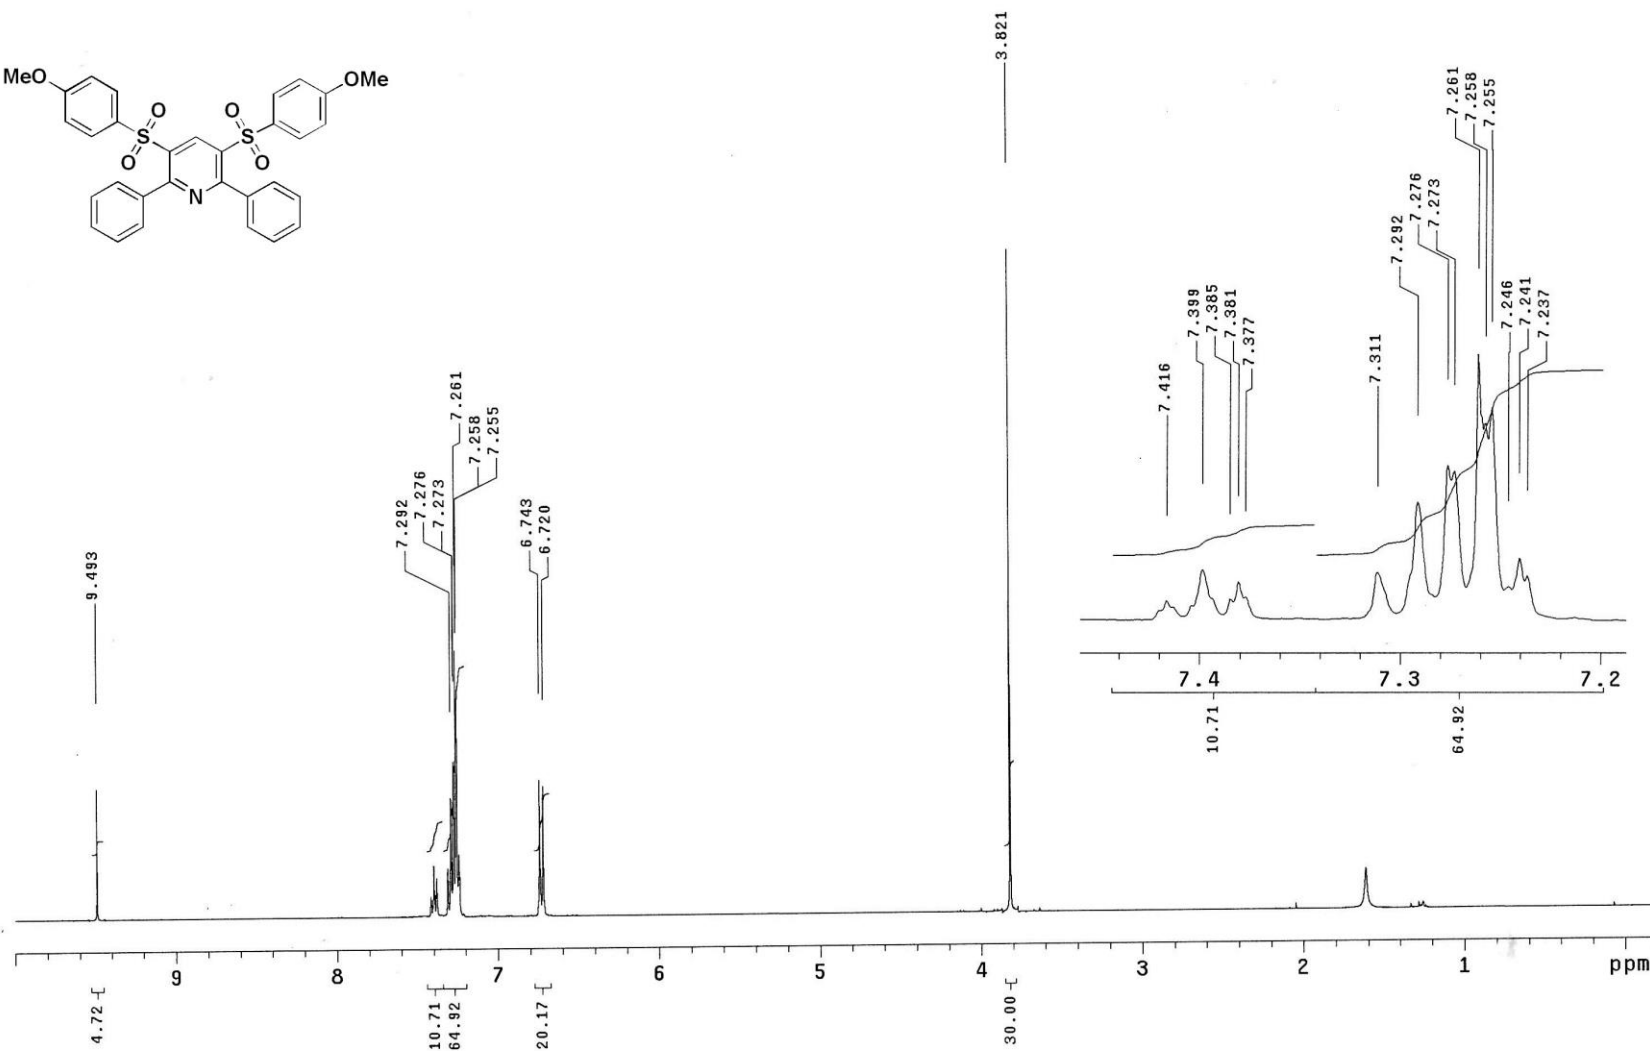



# Compound 4k (<sup>13</sup>C-NMR spectral data)

YCM5670

Pulse Sequence: s2pu1

UNITYplus-400 "unity400"

Date: Nov 7 2022

Solvent: CDCl<sub>3</sub>

Ambient temperature

Total 1072 repetitions

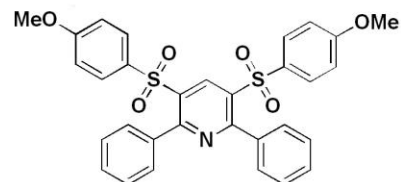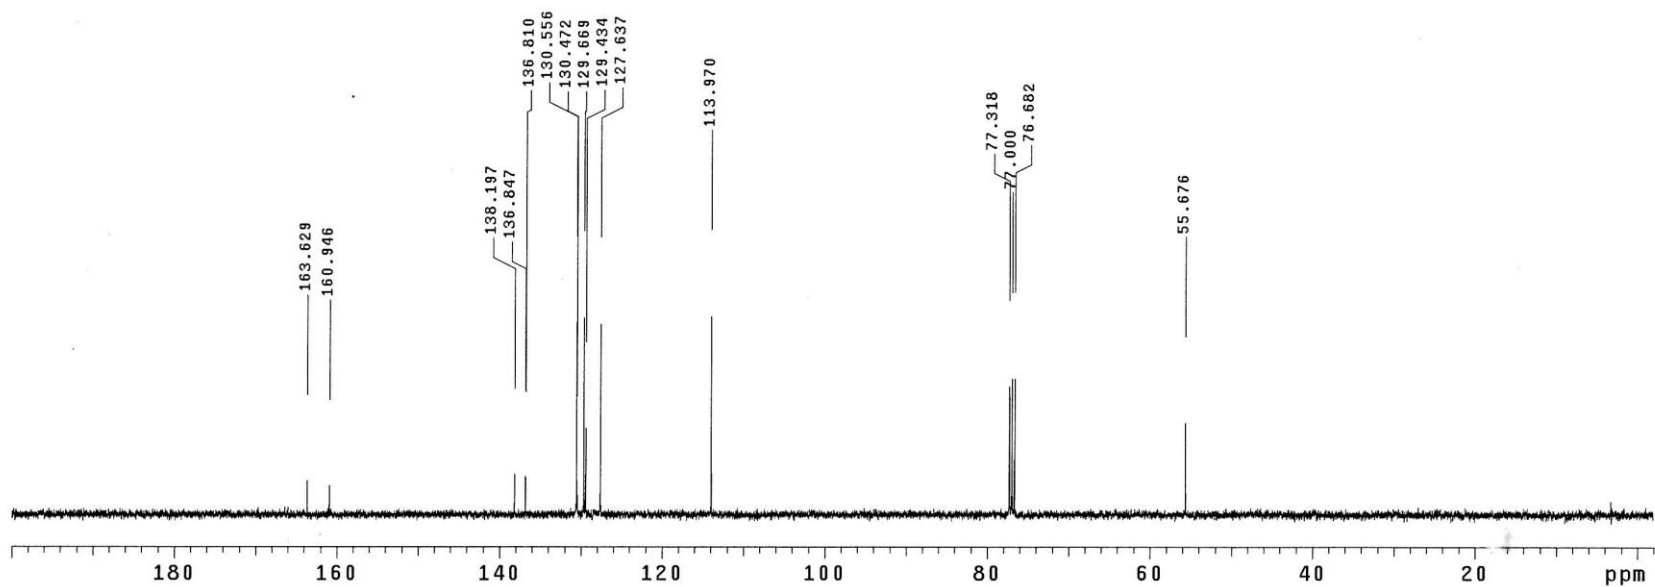

# Compound 4I (<sup>1</sup>H-NMR spectral data)

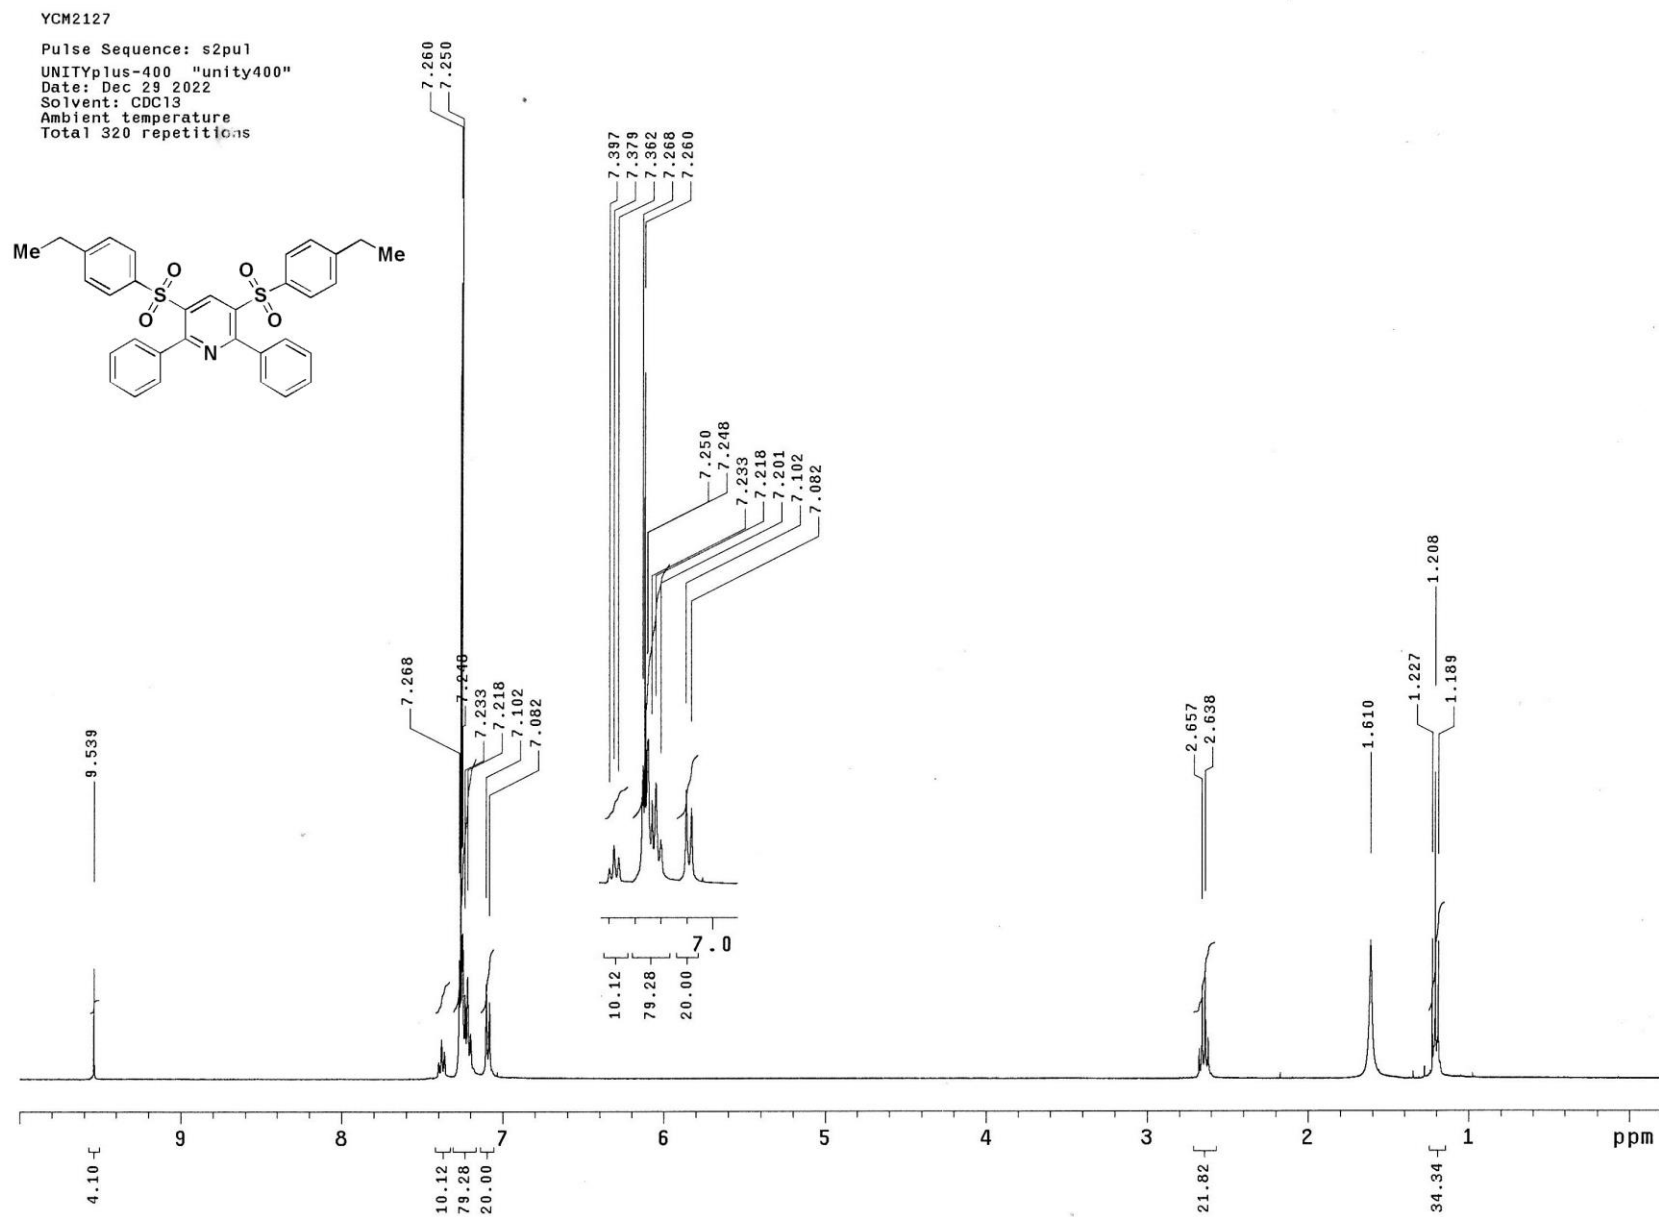

# Compound 4I (<sup>13</sup>C-NMR spectral data)

YCM2127

Pulse Sequence: s2pu1  
UNITYplus-400 "unity400"  
Date: Dec 29 2022  
Solvent: CDCl<sub>3</sub>  
Ambient temperature  
Total 37328 repetitions

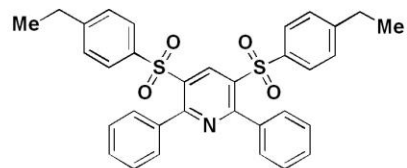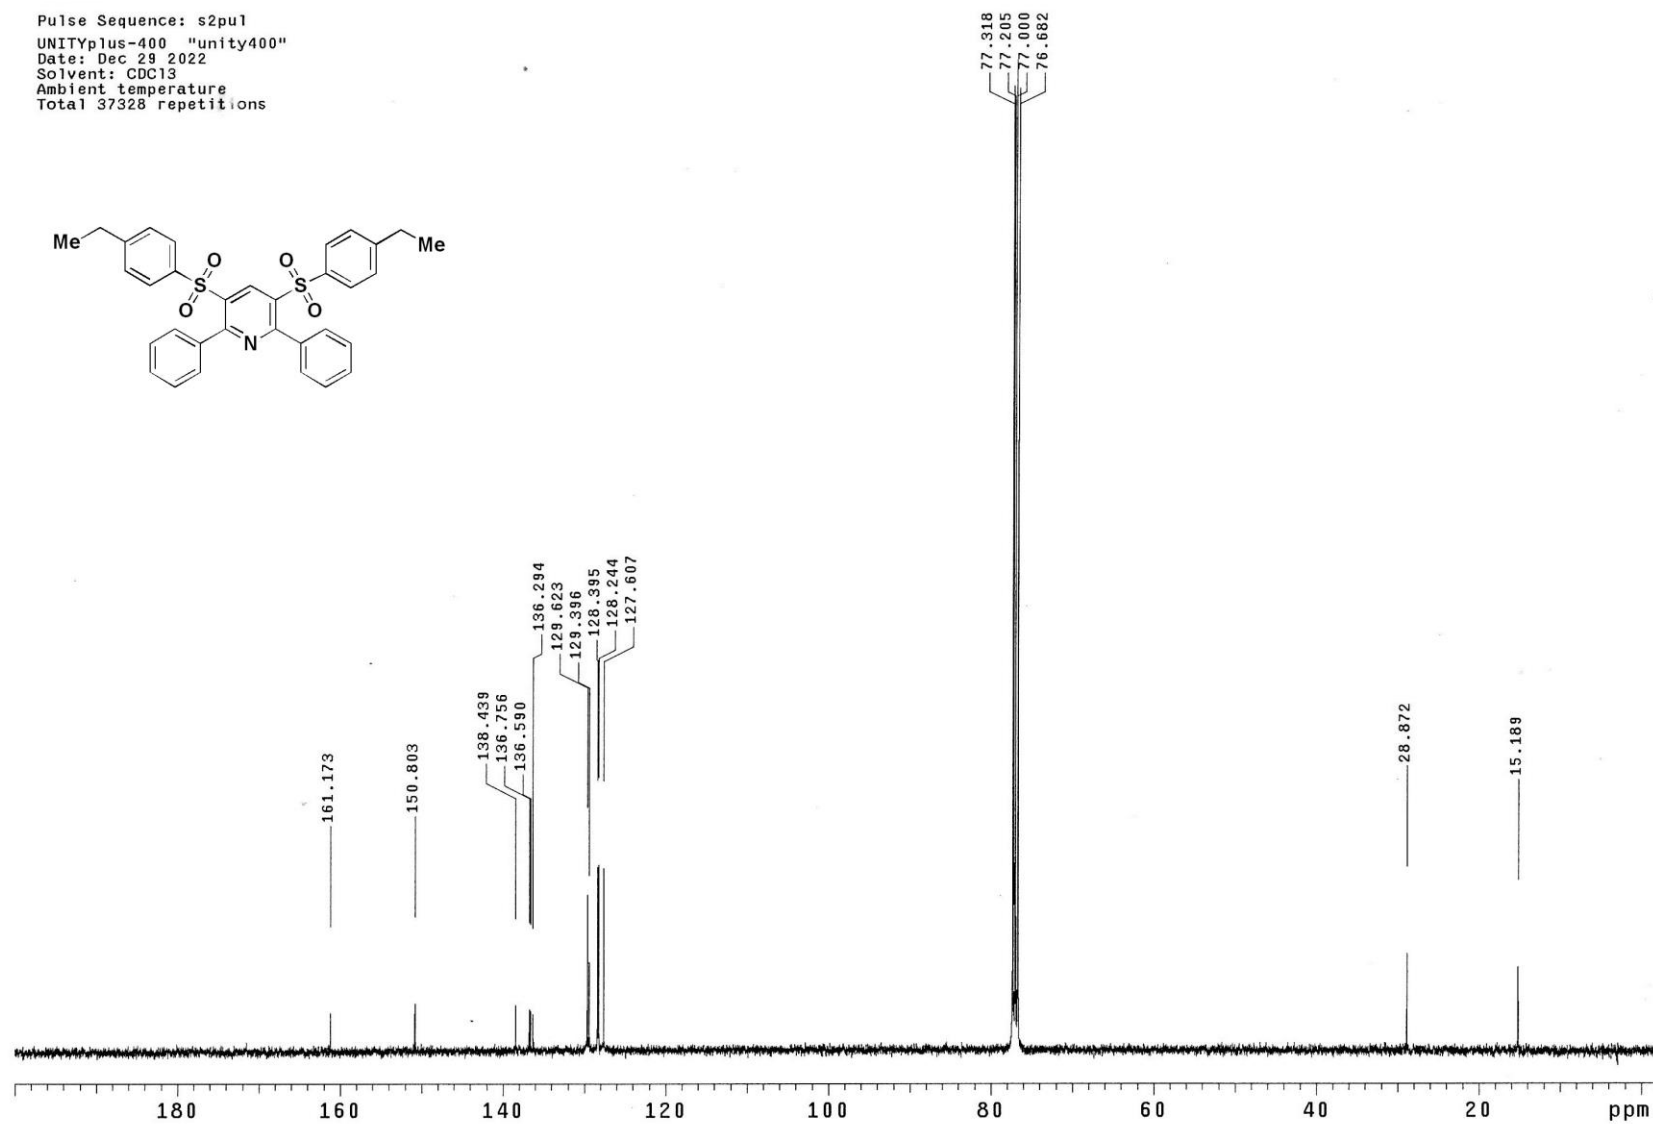

# Compound 4m (<sup>1</sup>H-NMR spectral data)

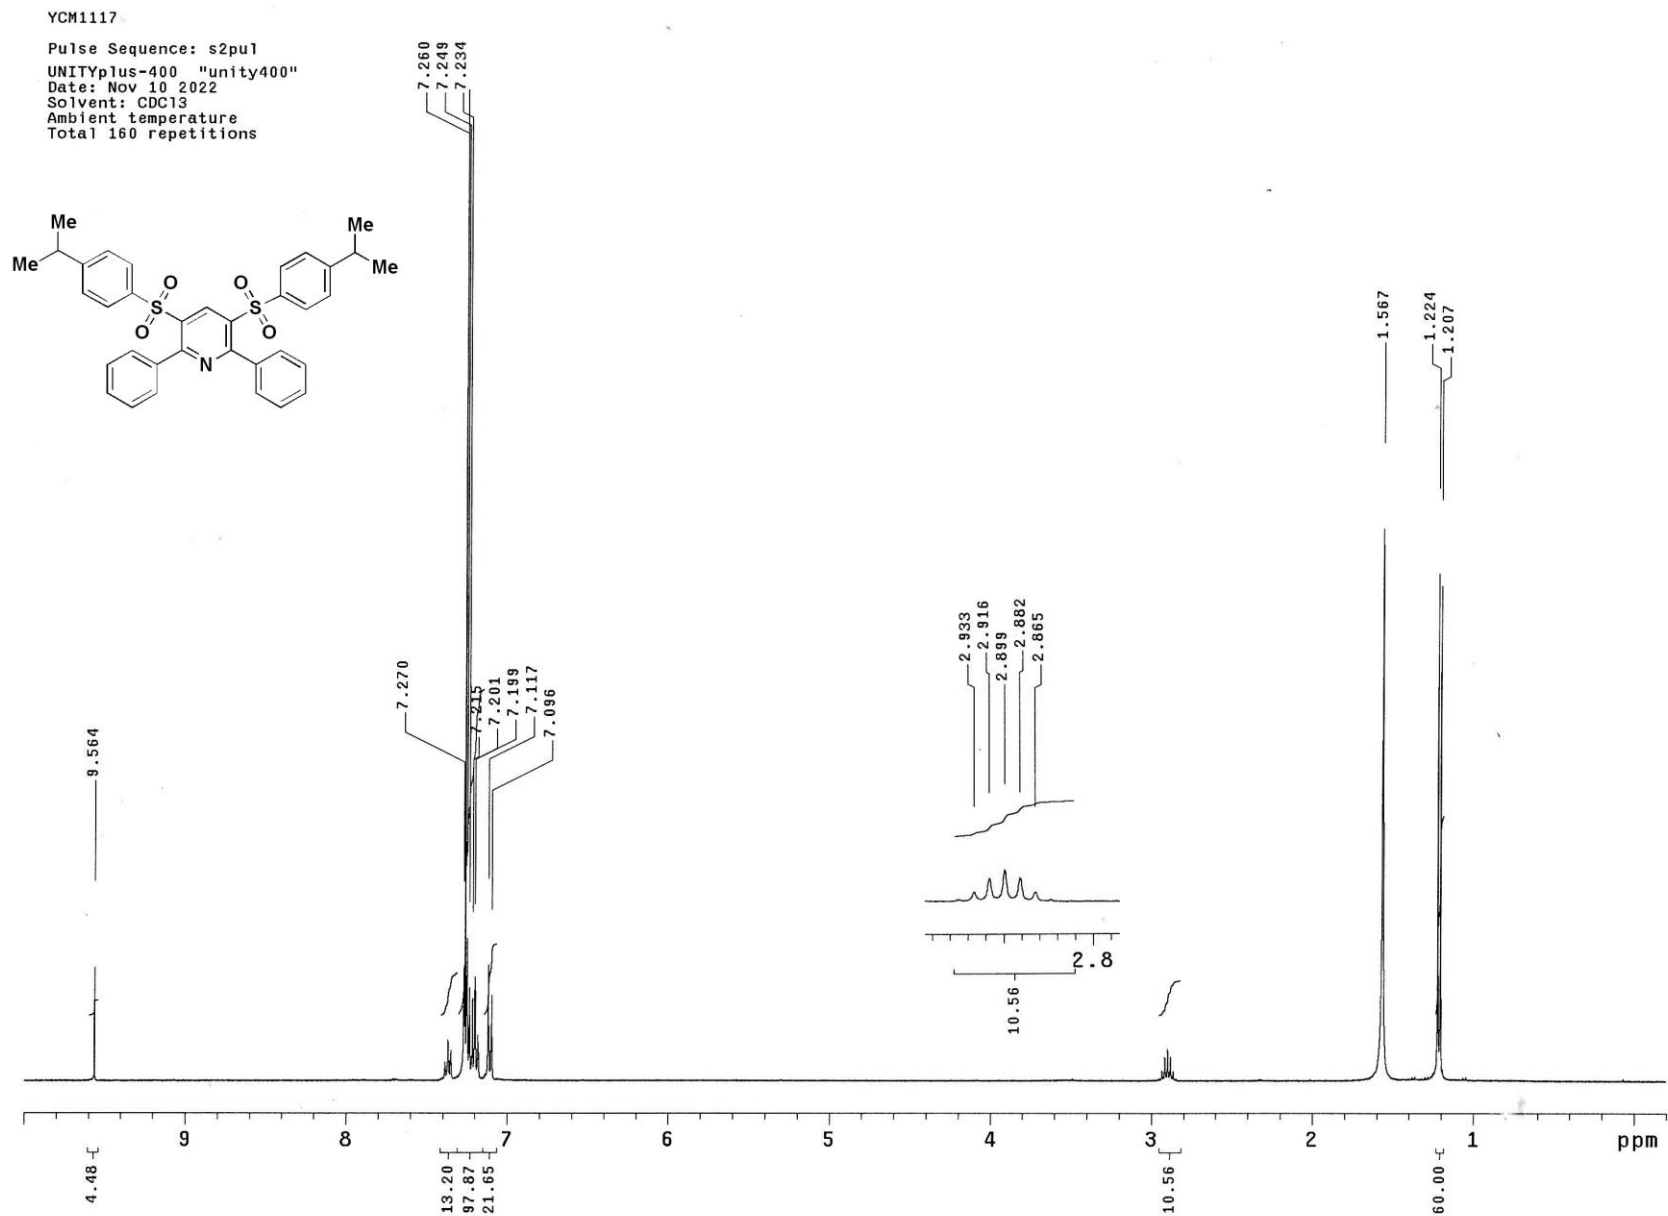

# Compound 4m (<sup>13</sup>C-NMR spectral data)

YCM1117

Pulse Sequence: s2pu1

UNITYplus-400 "unity400"

Date: Nov 10 2022

Solvent: CDCl<sub>3</sub>

Ambient temperature

Total 35120 repetitions

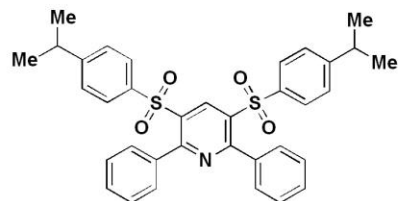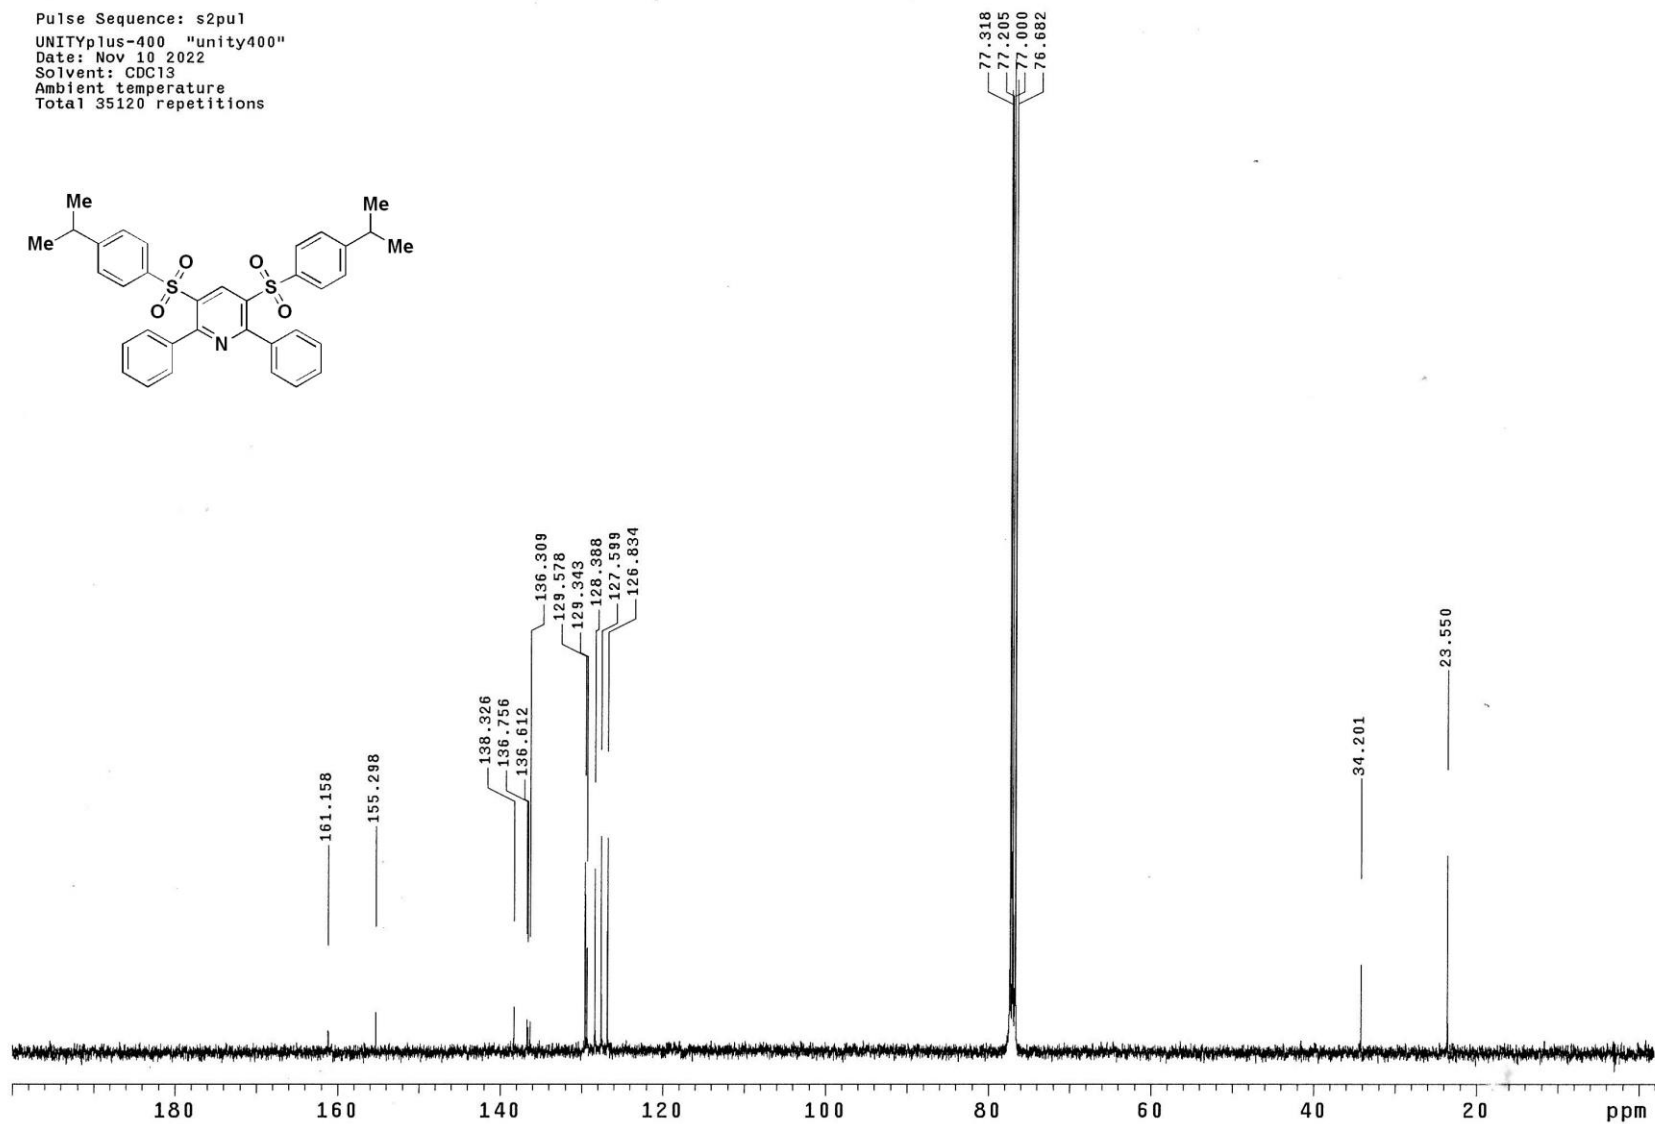

# Compound 4n (<sup>1</sup>H-NMR spectral data)

YCM1430

Pulse Sequence: s2pu1  
 UNITYplus-600 "KMU600.kmu.edu.tw"  
 Date: Nov 17 2022  
 Solvent: cdc13  
 Temp. 28.0 C / 301.1 K  
 Total 128 repetitions

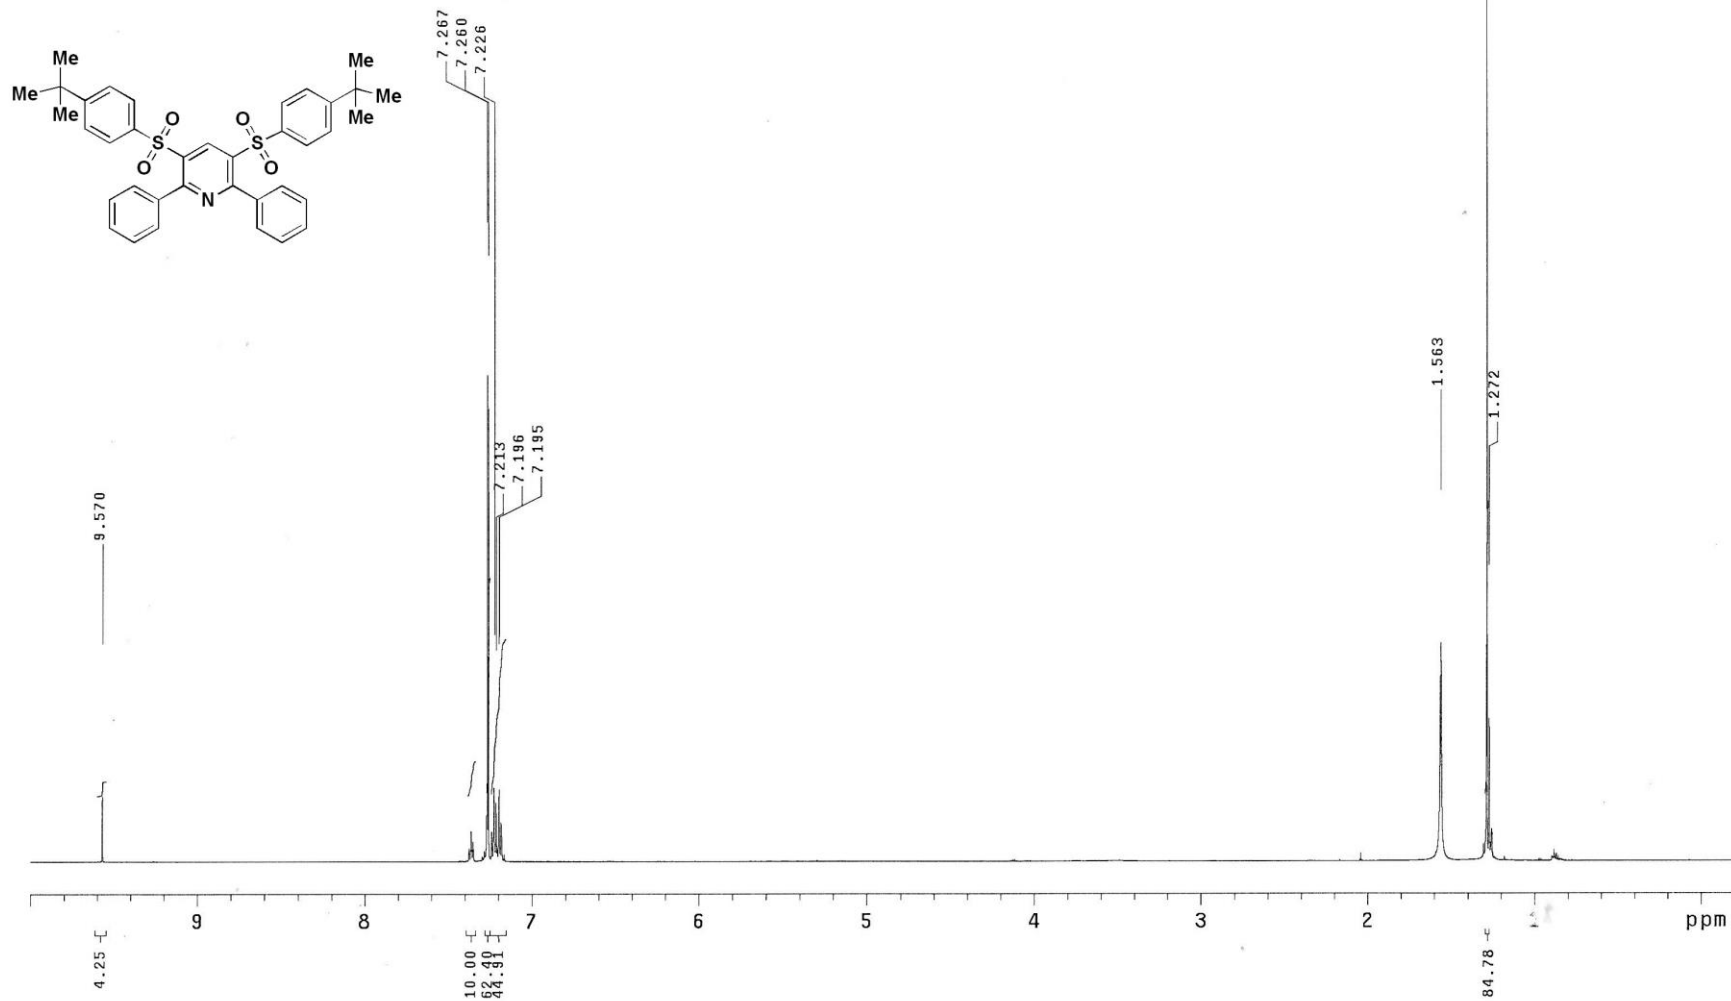

# Compound 4n (<sup>13</sup>C-NMR spectral data)

YCM1430

Pulse Sequence: s2pu1

UNITYplus-600 "KMU600.kmu.edu.tw"

Date: Nov 17 2022

Solvent: cdc13

Temp. 28.0 C / 301.1 K

Total 30168 repetitions

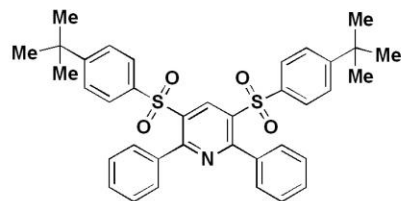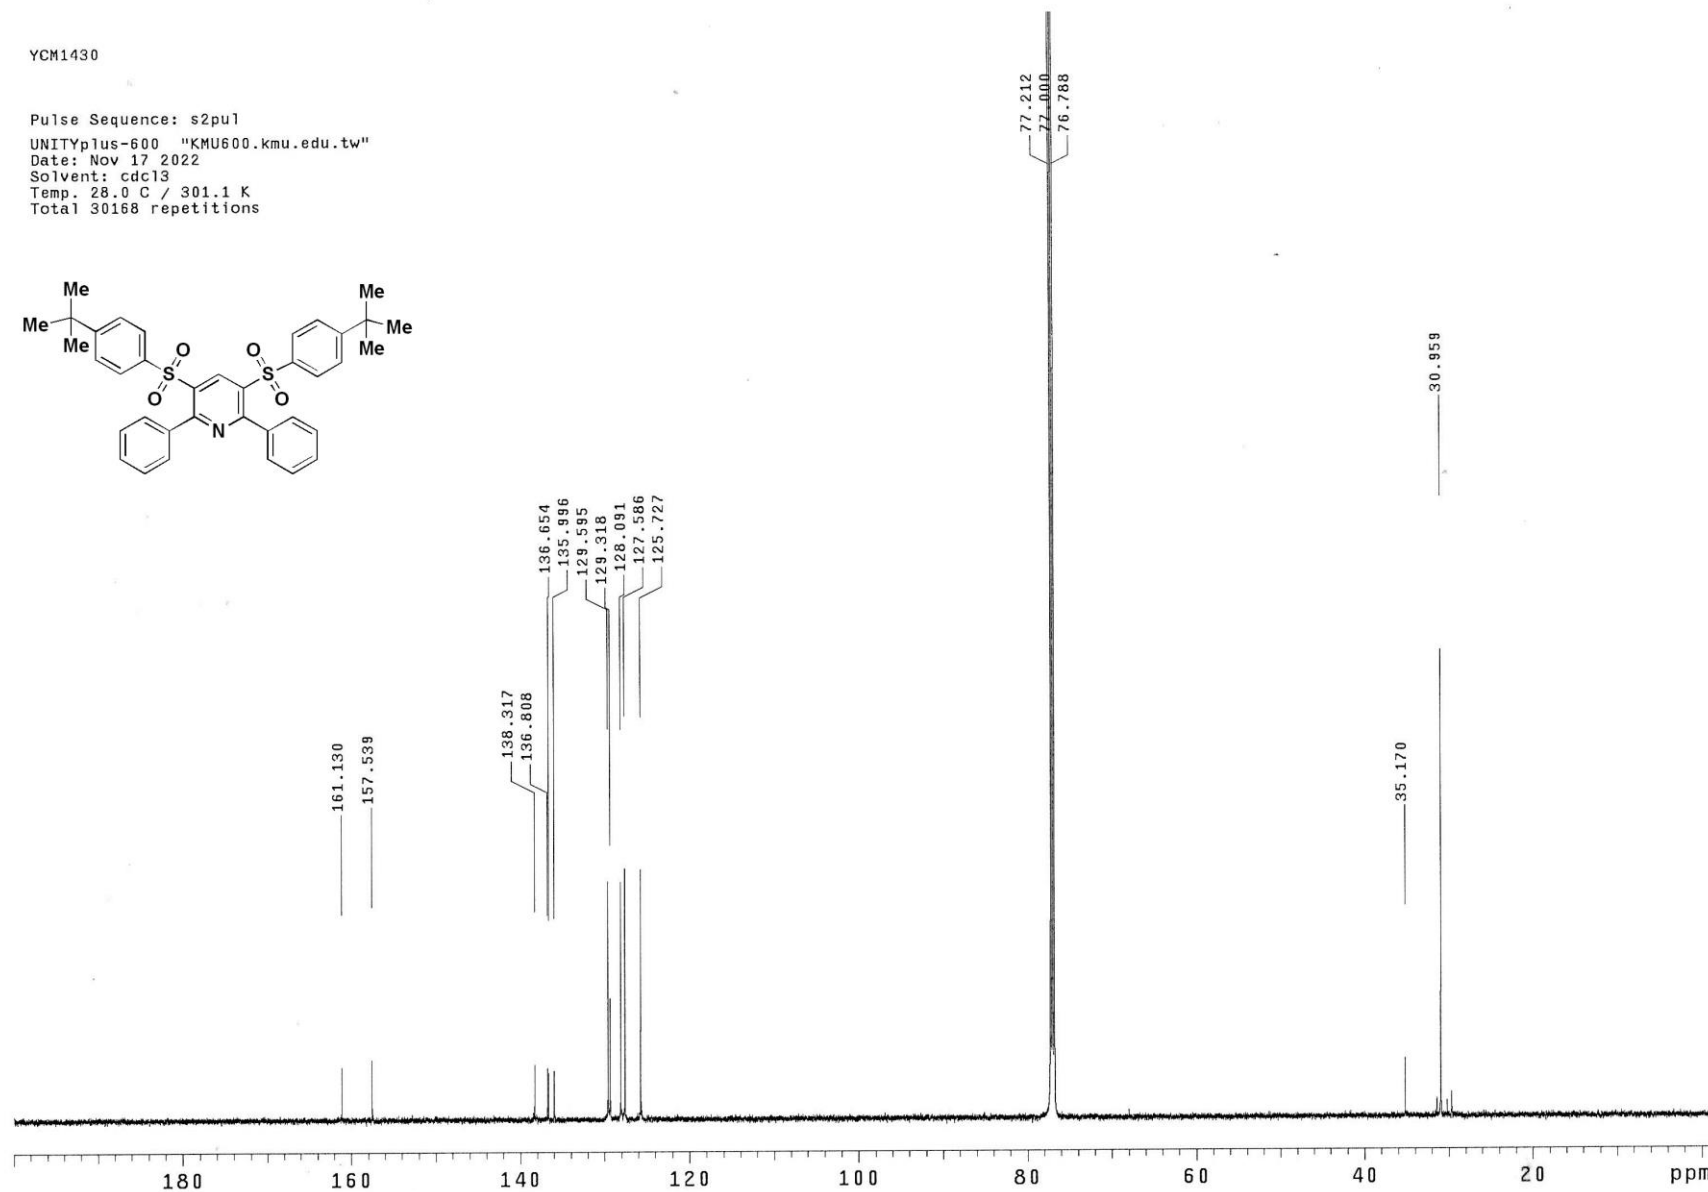

# Compound 4o (<sup>1</sup>H-NMR spectral data)

YCM4250

Pulse Sequence: s2pu1  
 UNITYplus-400 "unity400"  
 Date: Feb 1 2023  
 Solvent: CDCl<sub>3</sub>  
 Ambient temperature  
 Total 160 repetitions

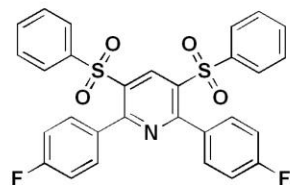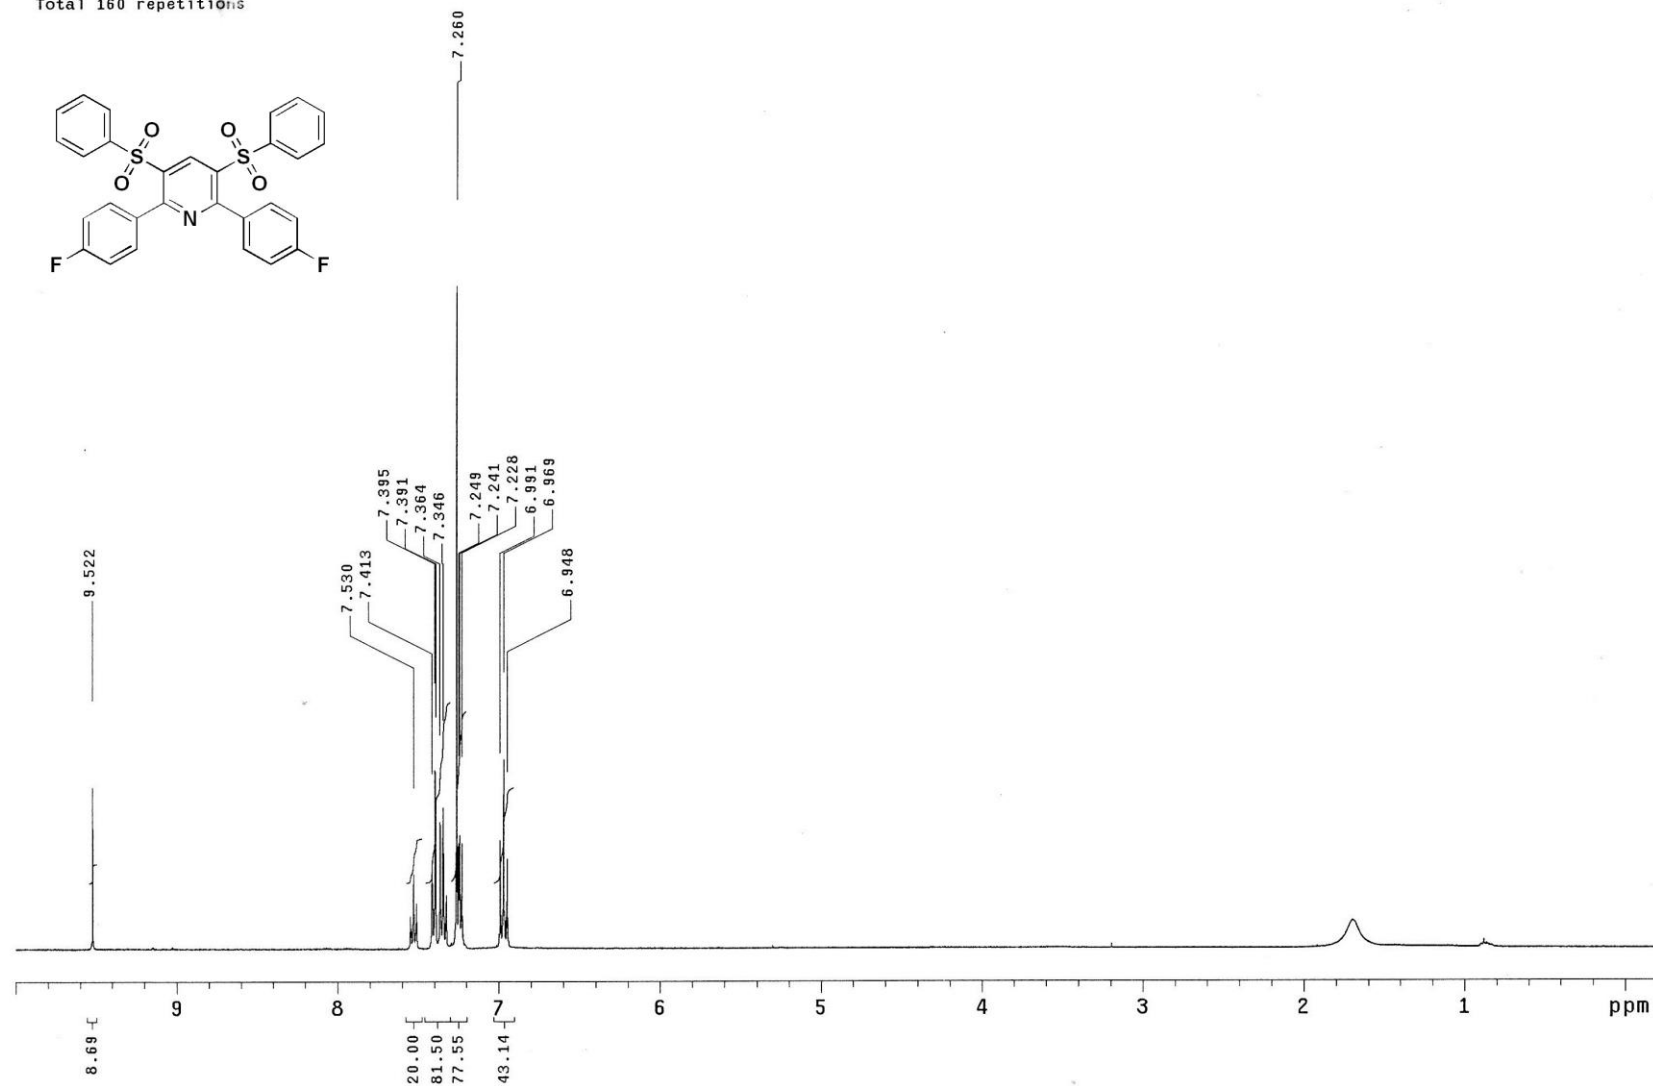



# Compound 4o (<sup>13</sup>C-NMR spectral data)

YCM4250

Pulse Sequence: s2pu1  
UNITYplus-400 "unity400"  
Date: Feb 1 2023  
Solvent: CDCl<sub>3</sub>  
Ambient temperature  
Total 44640 repetitions

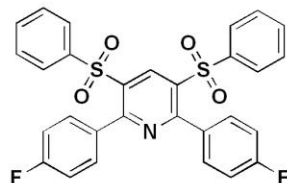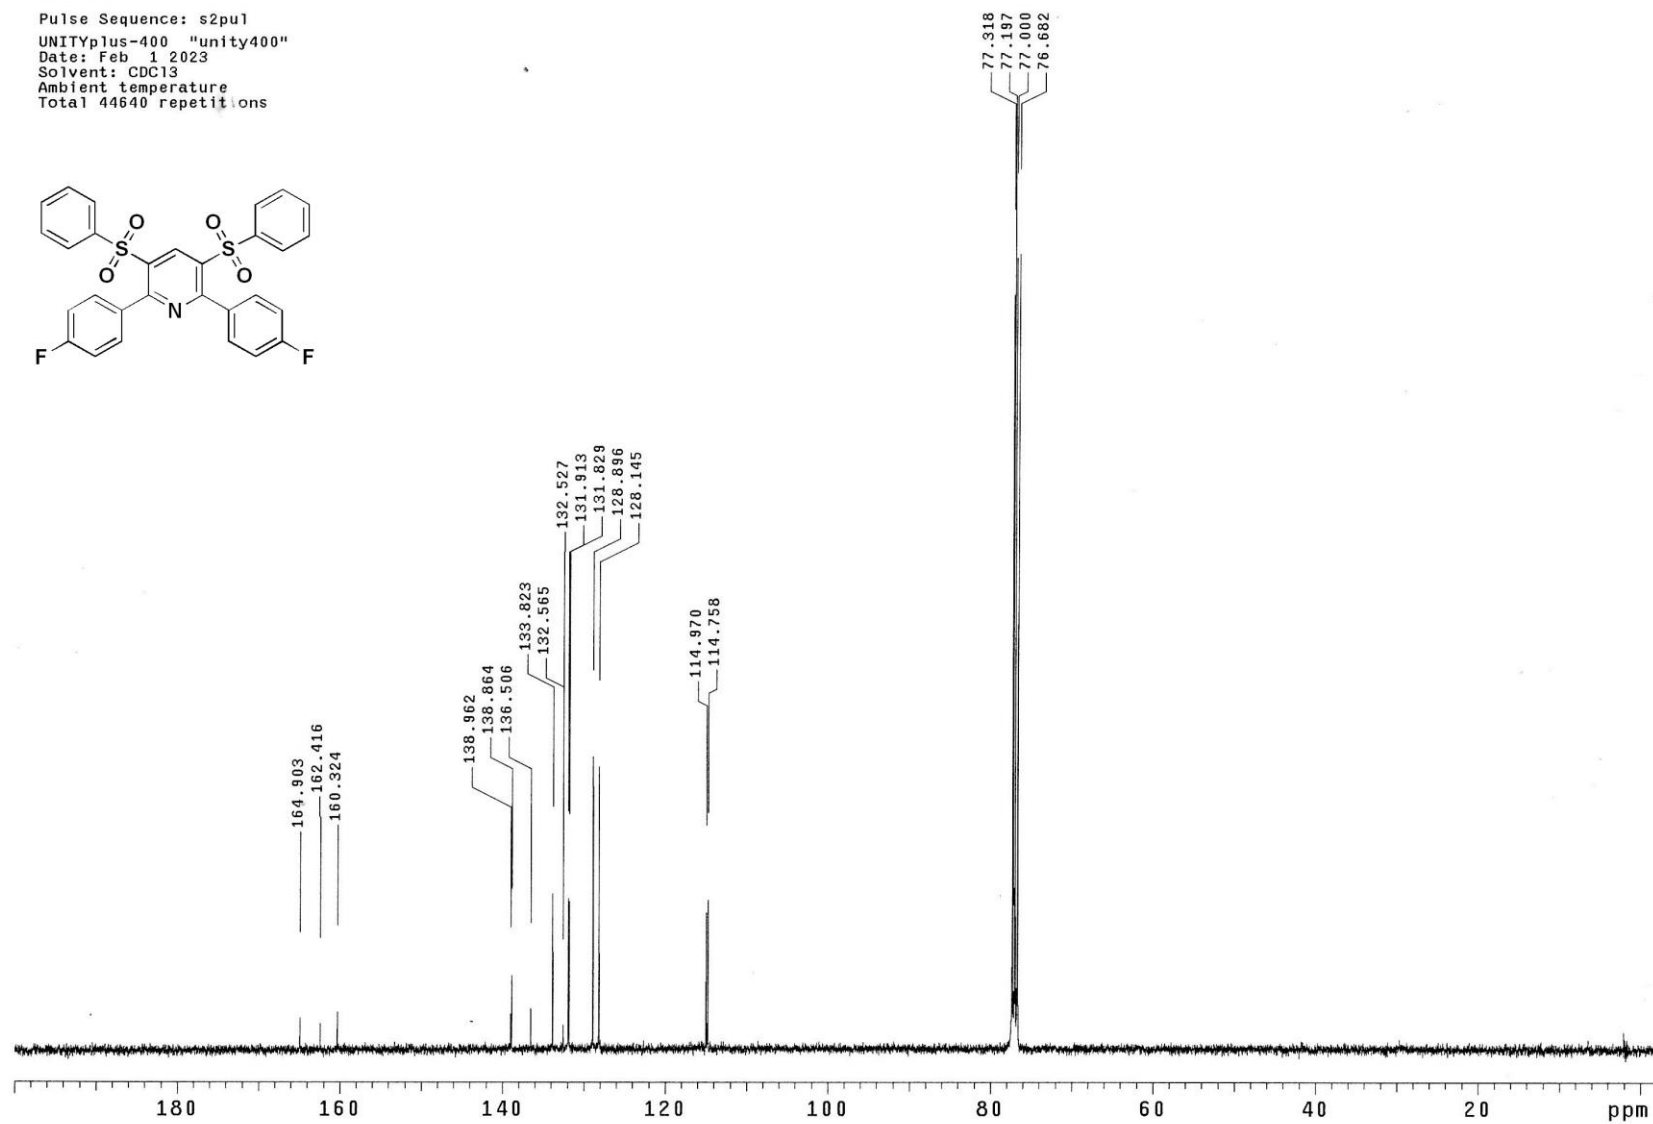

# Compound 4o (<sup>19</sup>F-NMR spectral data)

4o

Pulse Sequence: s2pu1  
Mercury-400BB "MerPlus400"  
Date: Aug 5 2024  
Solvent: cdc13  
Ambient temperature  
Total 1824 repetitions

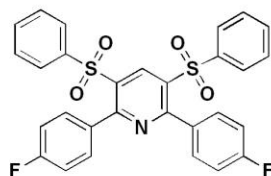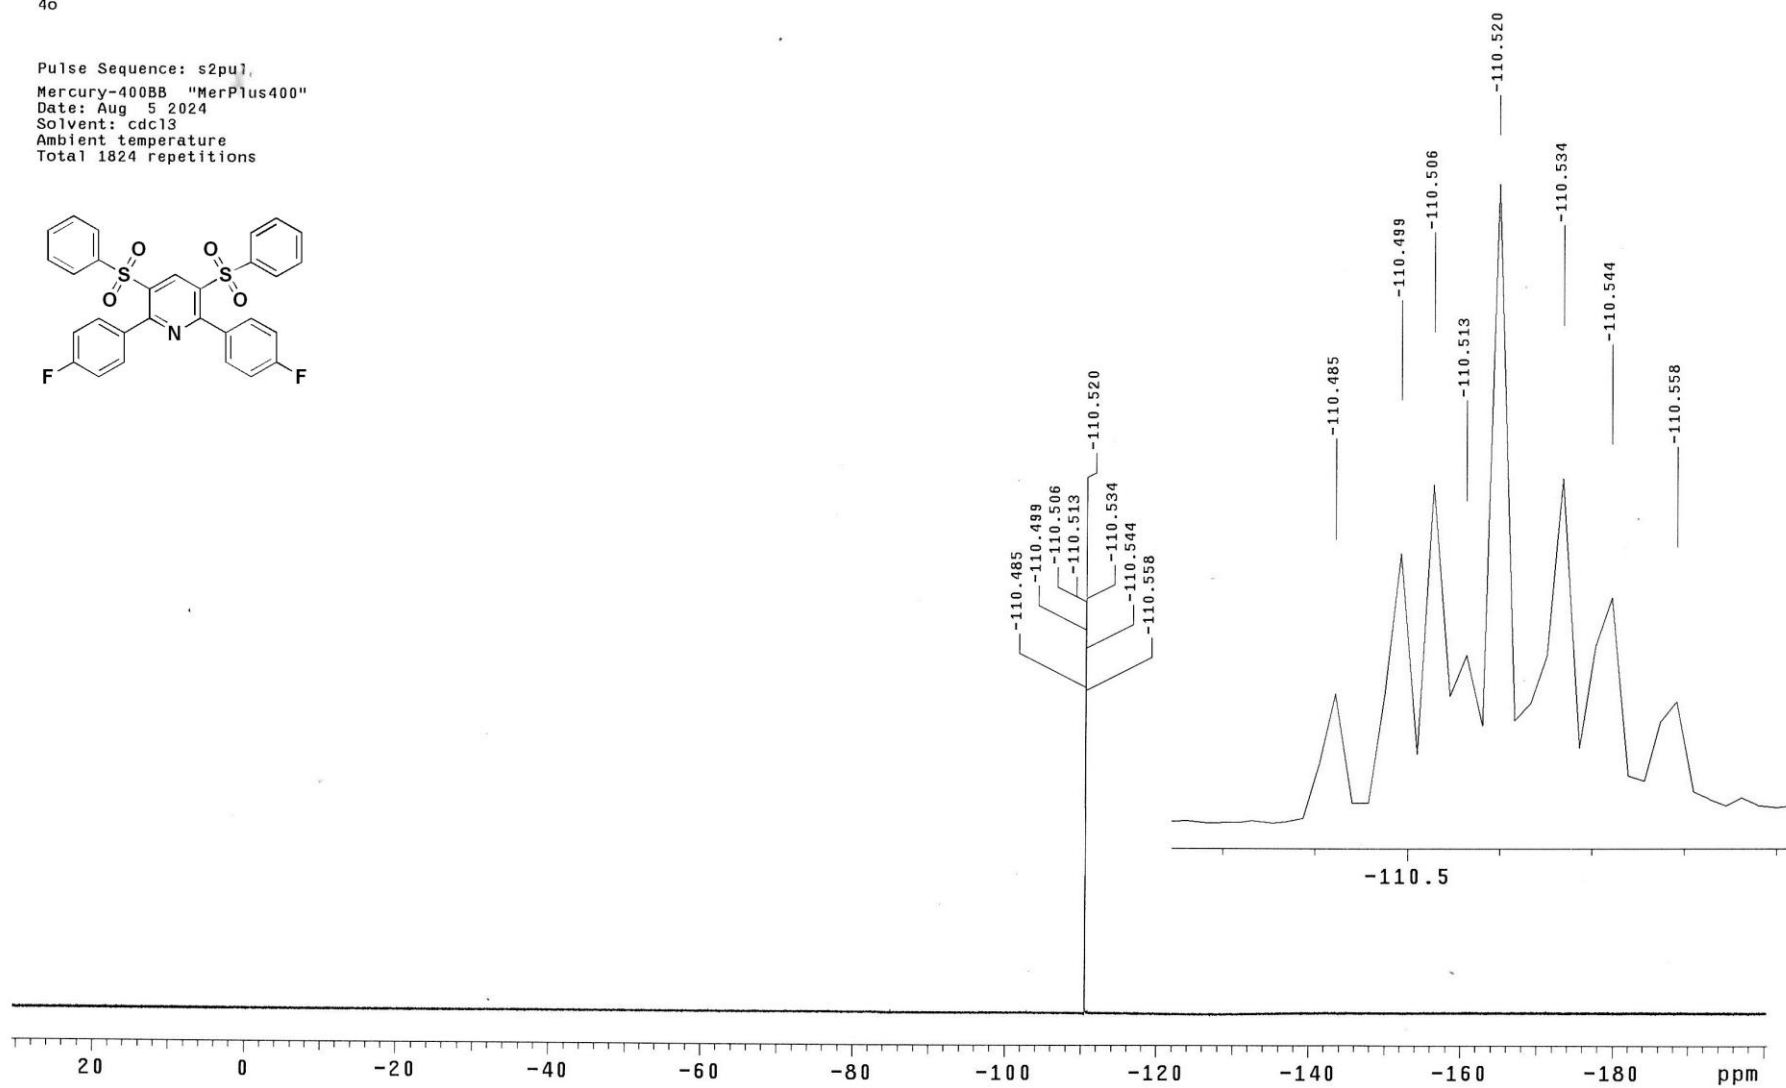

# Compound 4p (<sup>1</sup>H-NMR spectral data)

YCM2327

Pulse Sequence: s2pu1  
 UNITYplus-600 "KMU600.kmu.edu.tw"  
 Date: Nov 17 2022  
 Solvent: cdc13  
 Temp. 28.0 C / 301.1 K  
 Total 32 repetitions

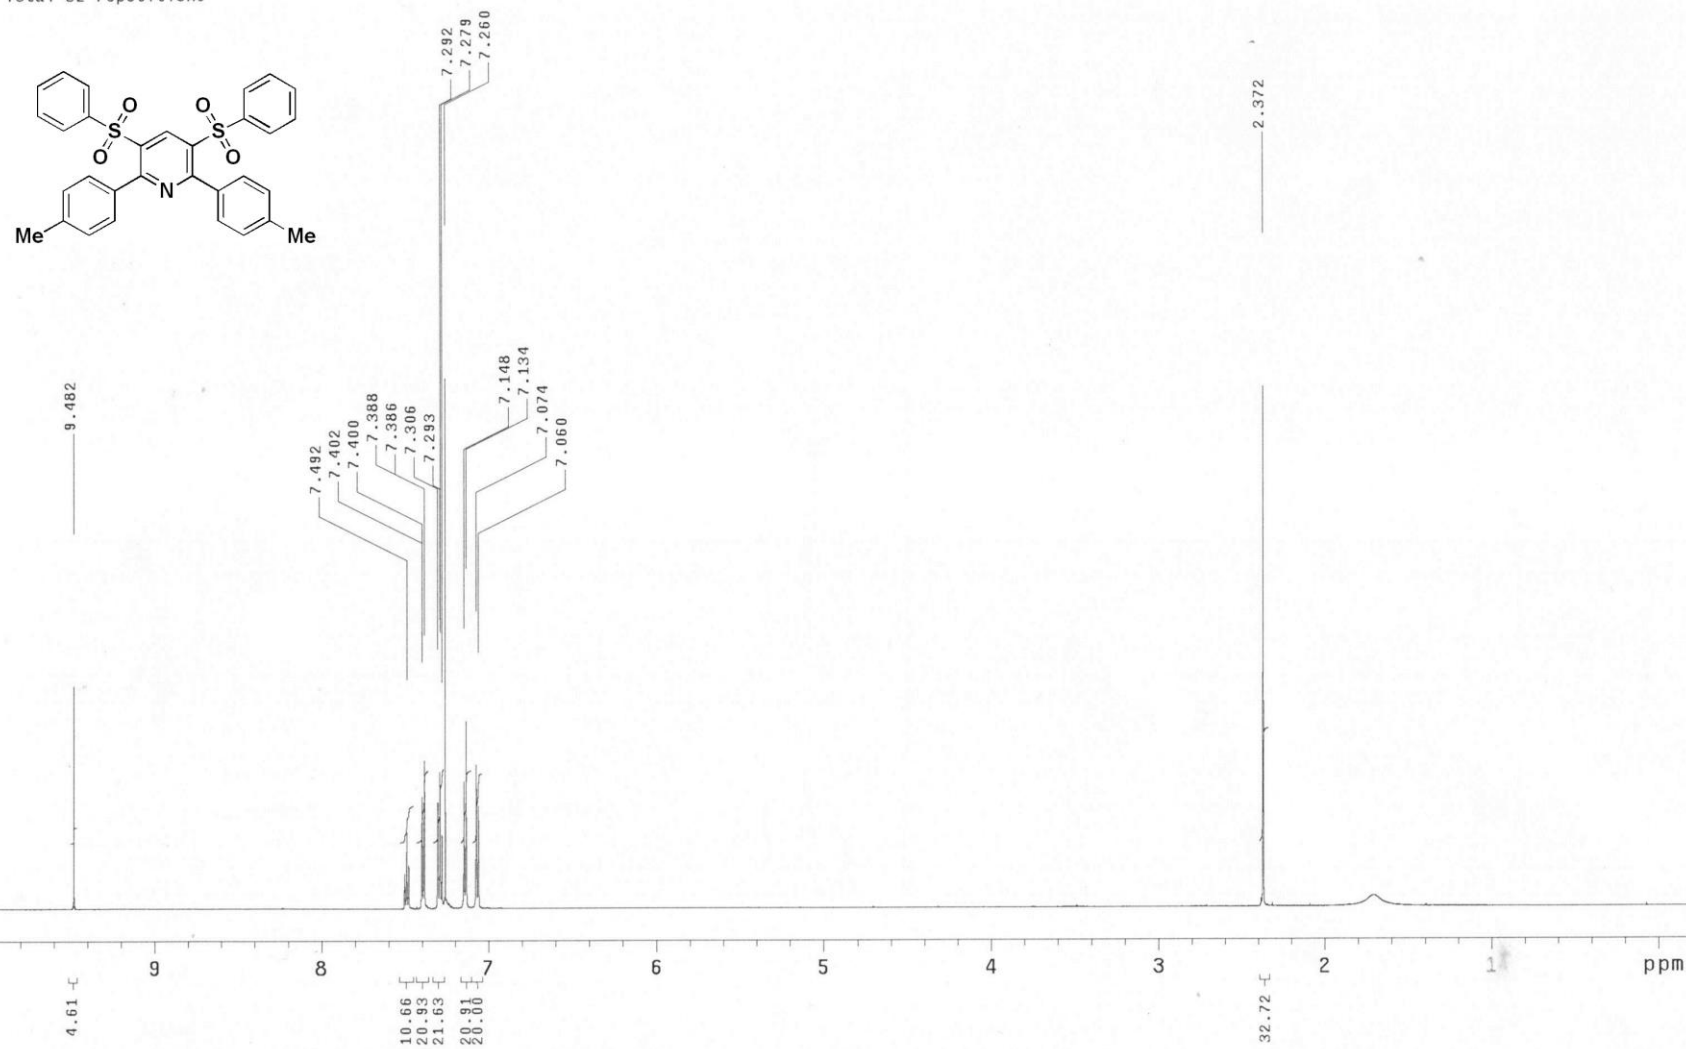

# Compound 4p (<sup>13</sup>C-NMR spectral data)

YCM2327

Pulse Sequence: s2pu1  
UNITYplus-600 "KMU600.kmu.edu.tw"  
Date: Nov 17 2022  
Solvent: cdc13  
Temp. 28.0 C / 301.1 K  
Total 1416 repetitions

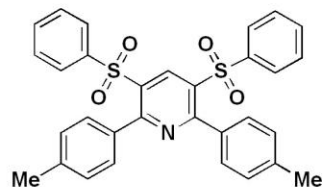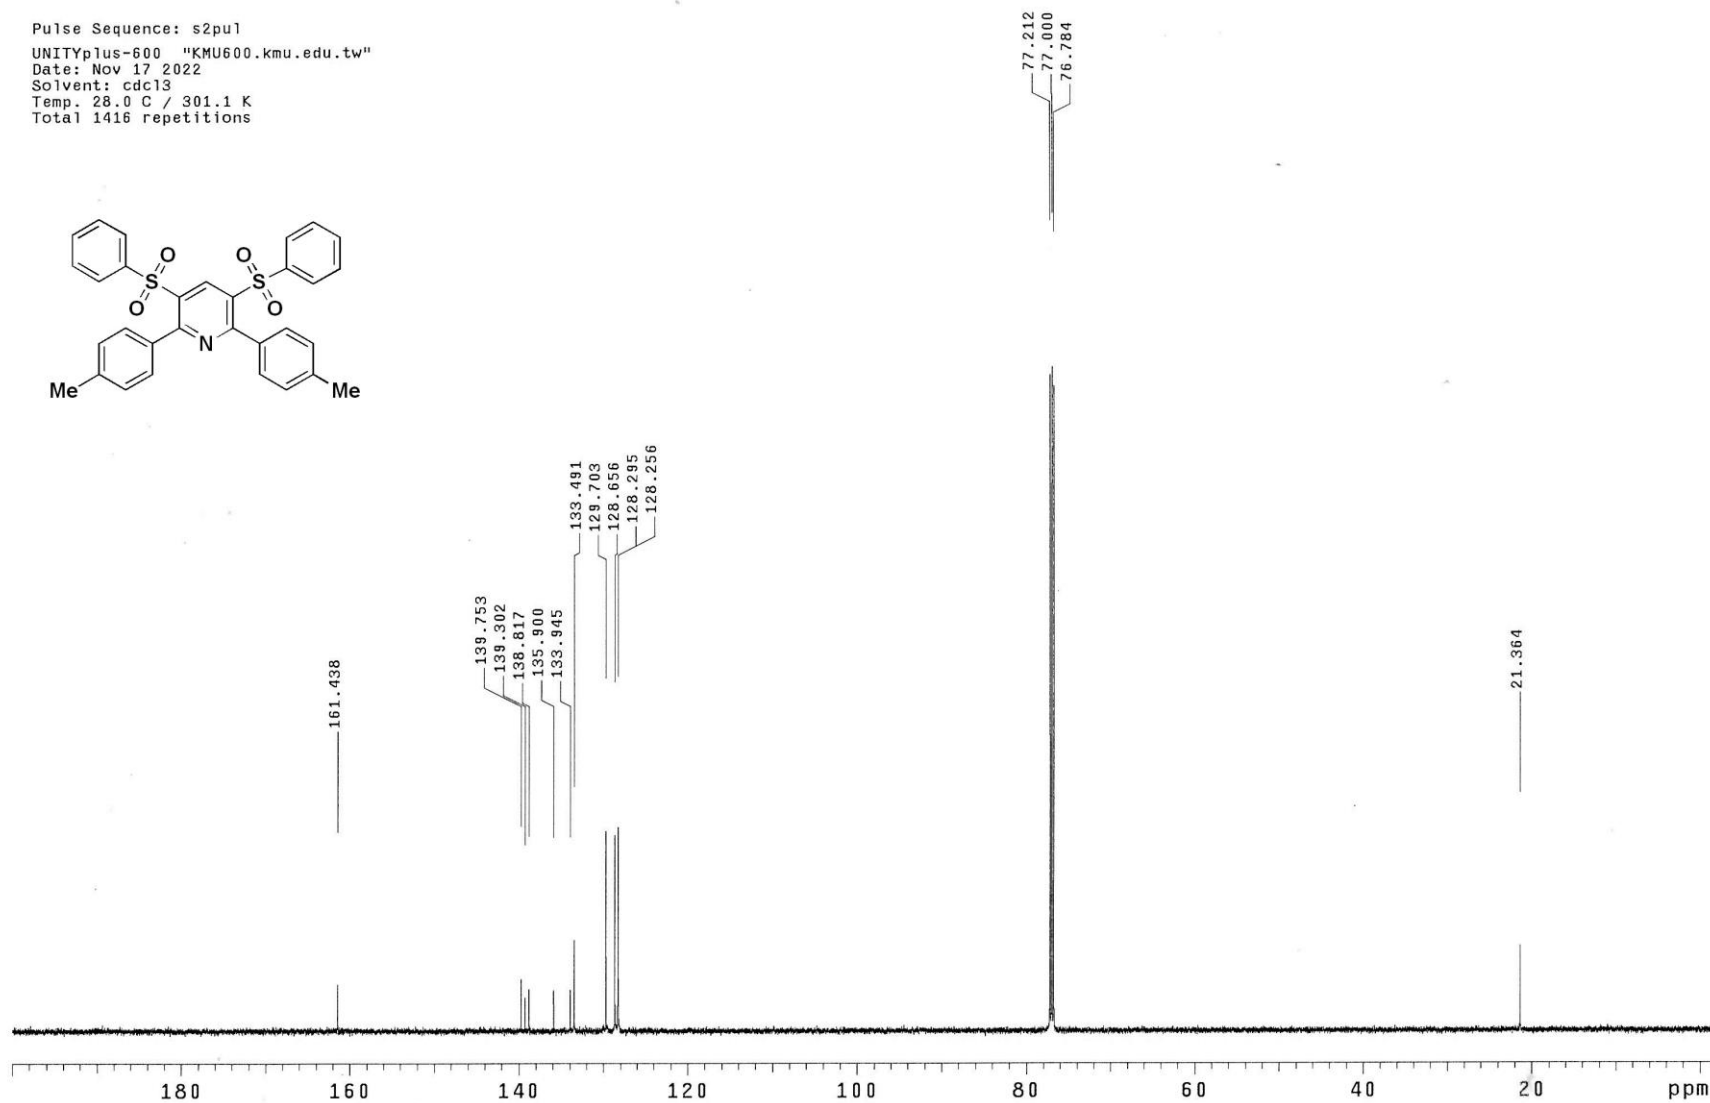

# Compound 4q (<sup>1</sup>H-NMR spectral data)

YCM3033

Pulse Sequence: s2pu1  
 UNITYplus-600 "KMU600.kmu.edu.tw"  
 Date: Nov 17 2022  
 Solvent: cdc13  
 Temp. 28.0 C / 301.1 K  
 Total 64 repetitions

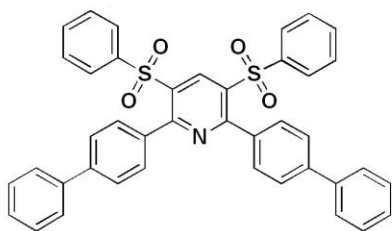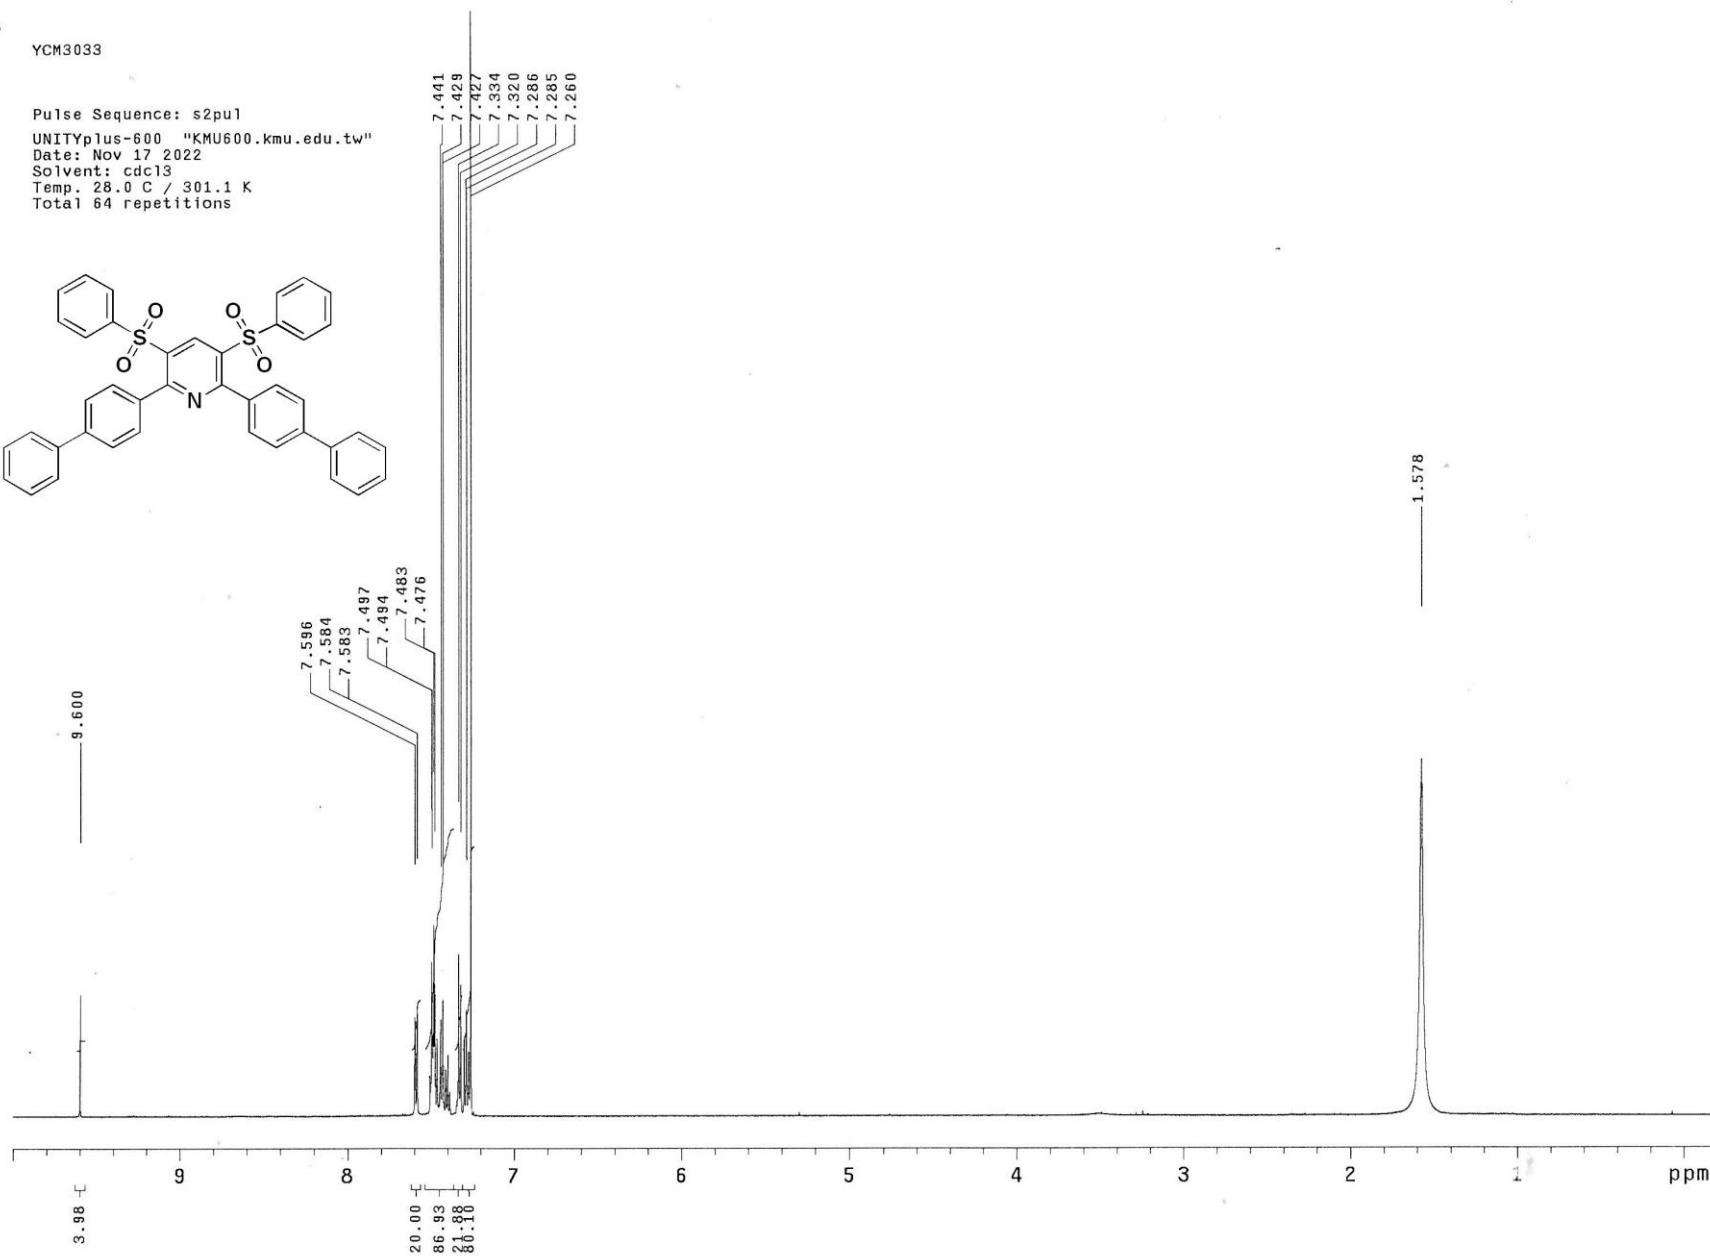

# Compound 4q (<sup>13</sup>C-NMR spectral data)

YCM3033

Pulse Sequence: s2pu1

UNITYplus-600 "KMU600.kmu.edu.tw"

Date: Nov 17 2022

Solvent: cdc13

Temp. 28.0 C / 301.1 K

Total 11440 repetitions

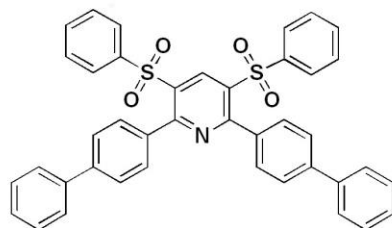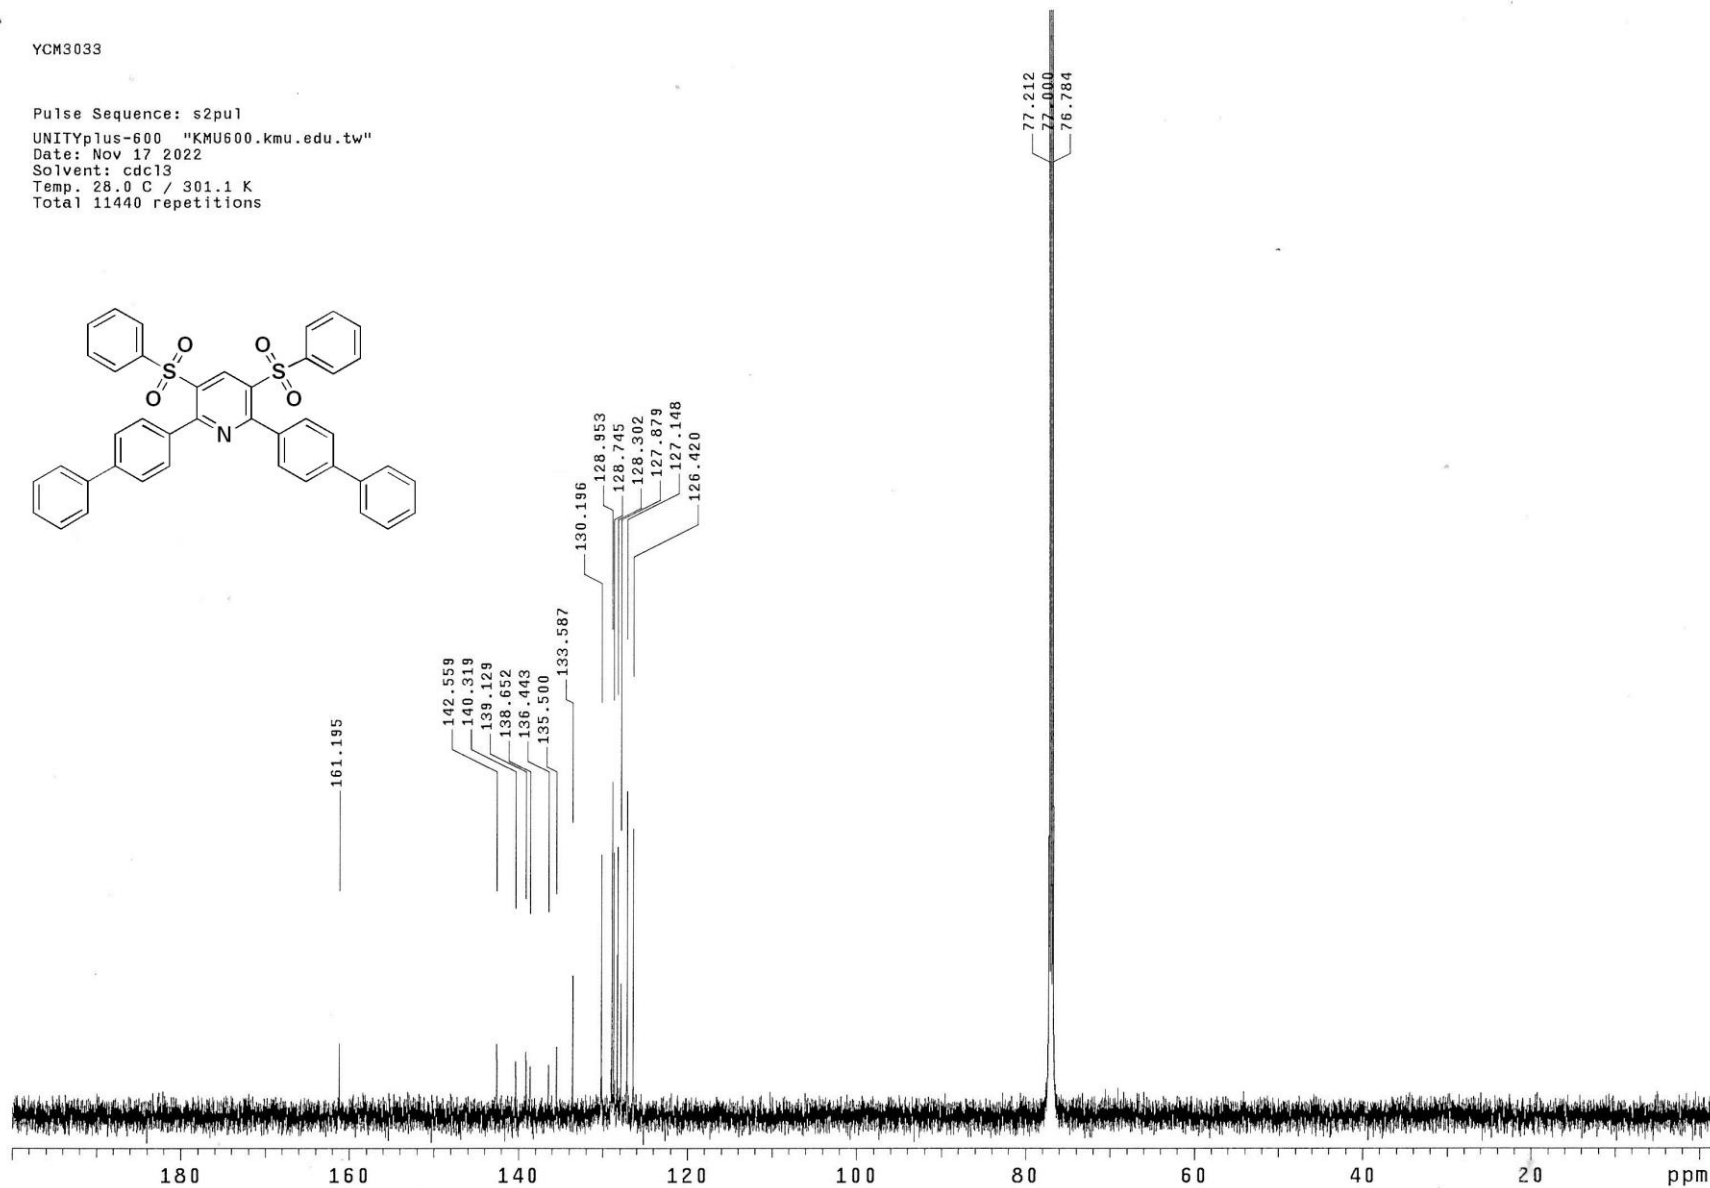

# Compound 4r (<sup>1</sup>H-NMR spectral data)

YCM5962

Pulse Sequence: s2pu1

UNITYplus-400 "unity400"

Date: Nov 29 2022

Solvent: CDCl<sub>3</sub>

Ambient temperature

Total 32 repetitions

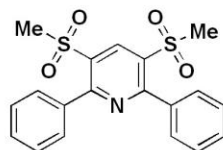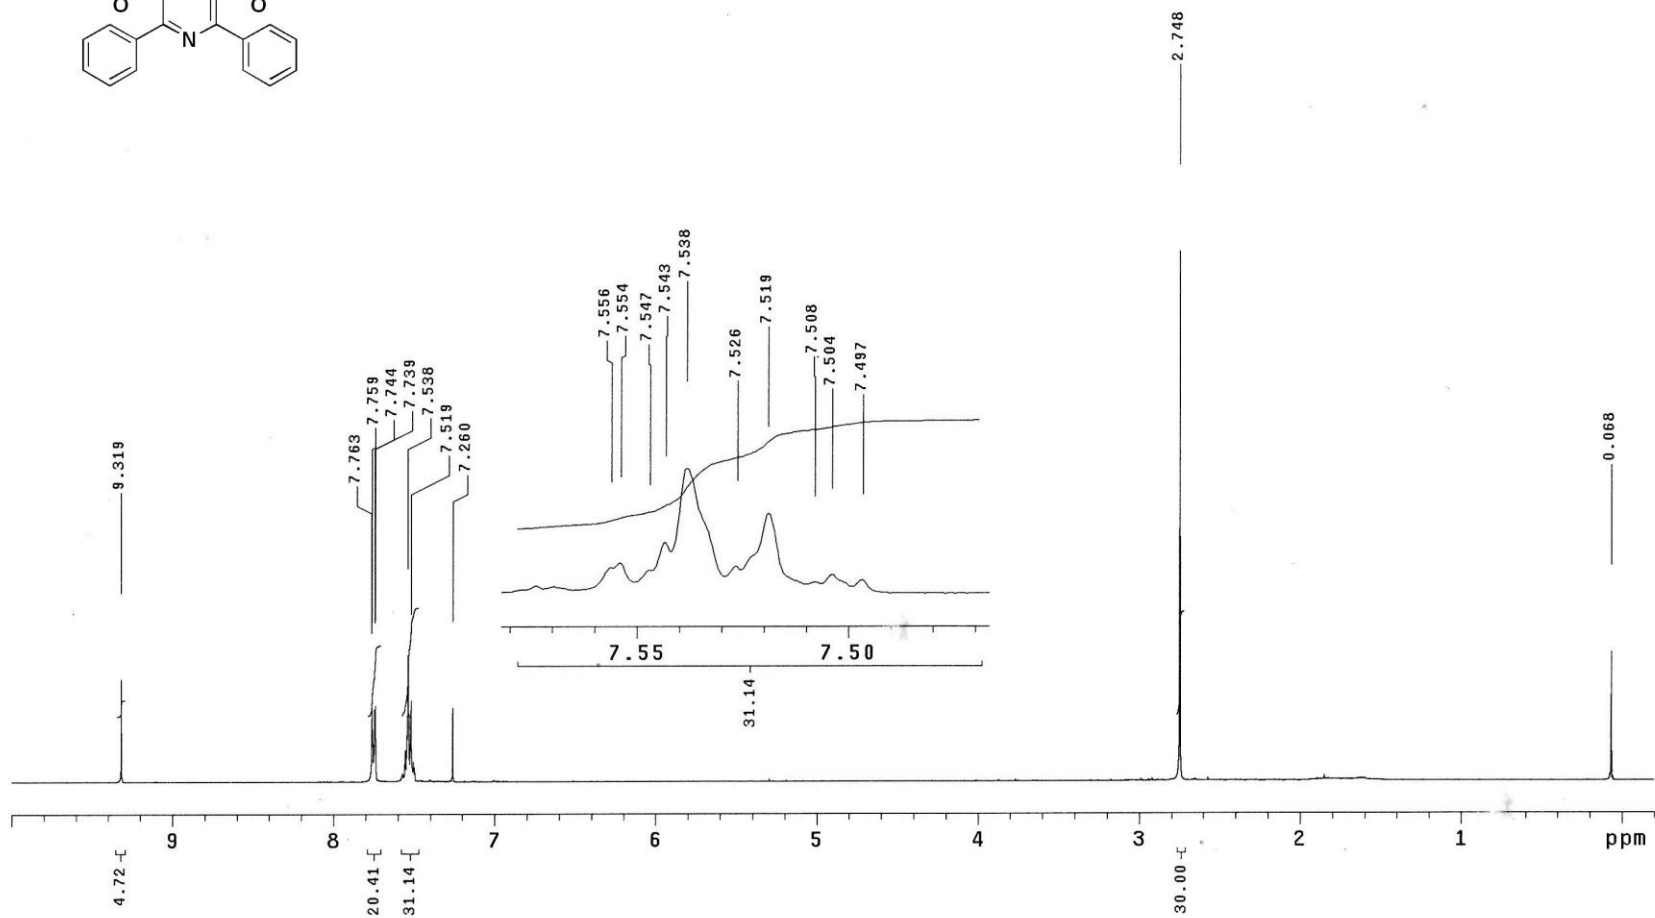

# Compound 4r (<sup>13</sup>C-NMR spectral data)

YCM5962

Pulse Sequence: s2pu1

UNITYplus-400 "unity400"

Date: Nov 29 2022

Solvent: CDCl<sub>3</sub>

Ambient temperature

Total 2080 repetitions

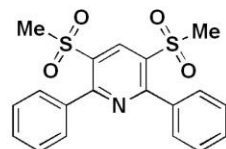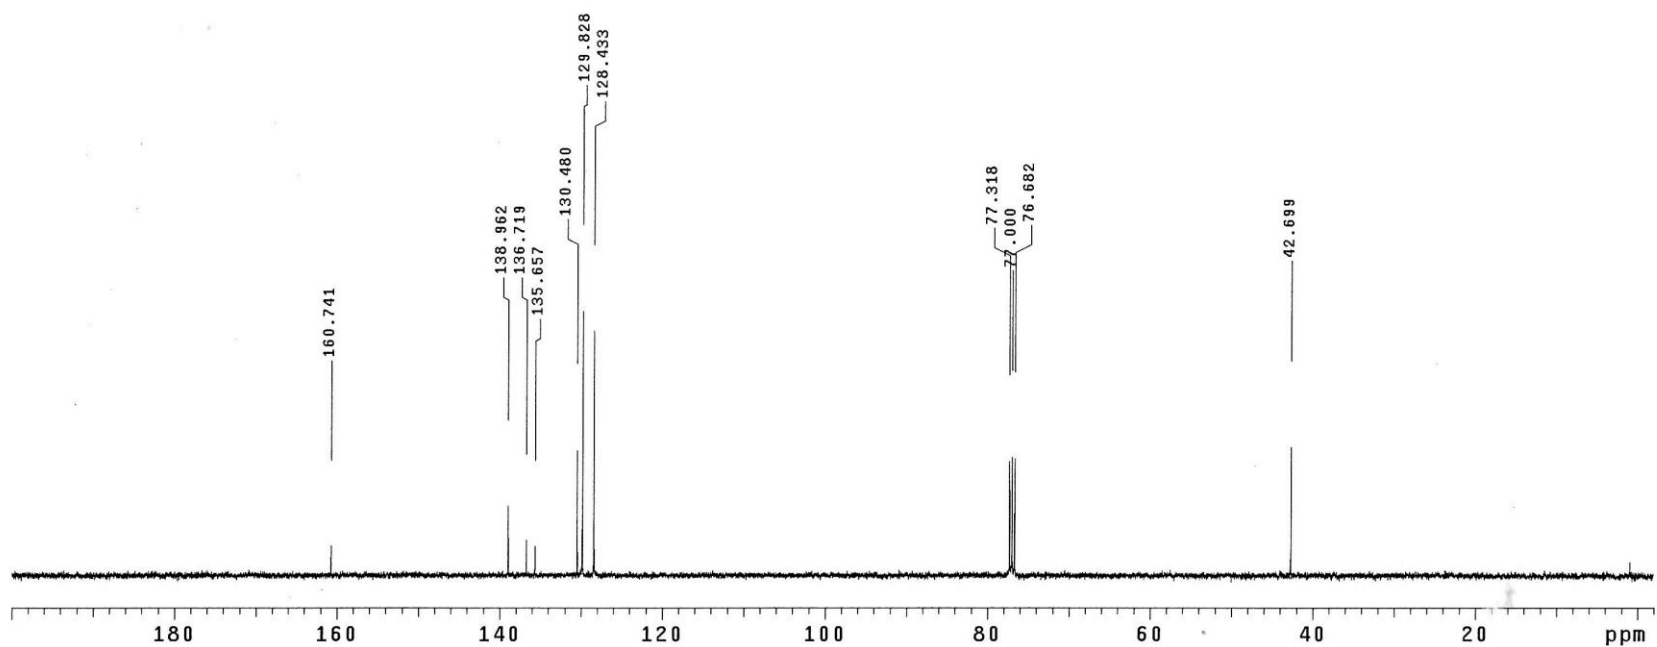



# Compound 4s (<sup>1</sup>H-NMR spectral data)

YCM2143

Pulse Sequence: s2pu1

UNITYplus-400 "unity400"

Date: Dec 22 2022

Solvent: CDCl<sub>3</sub>

Ambient temperature

Total 32 repetitions

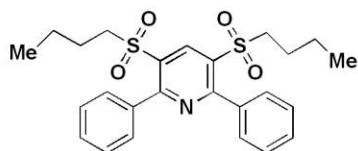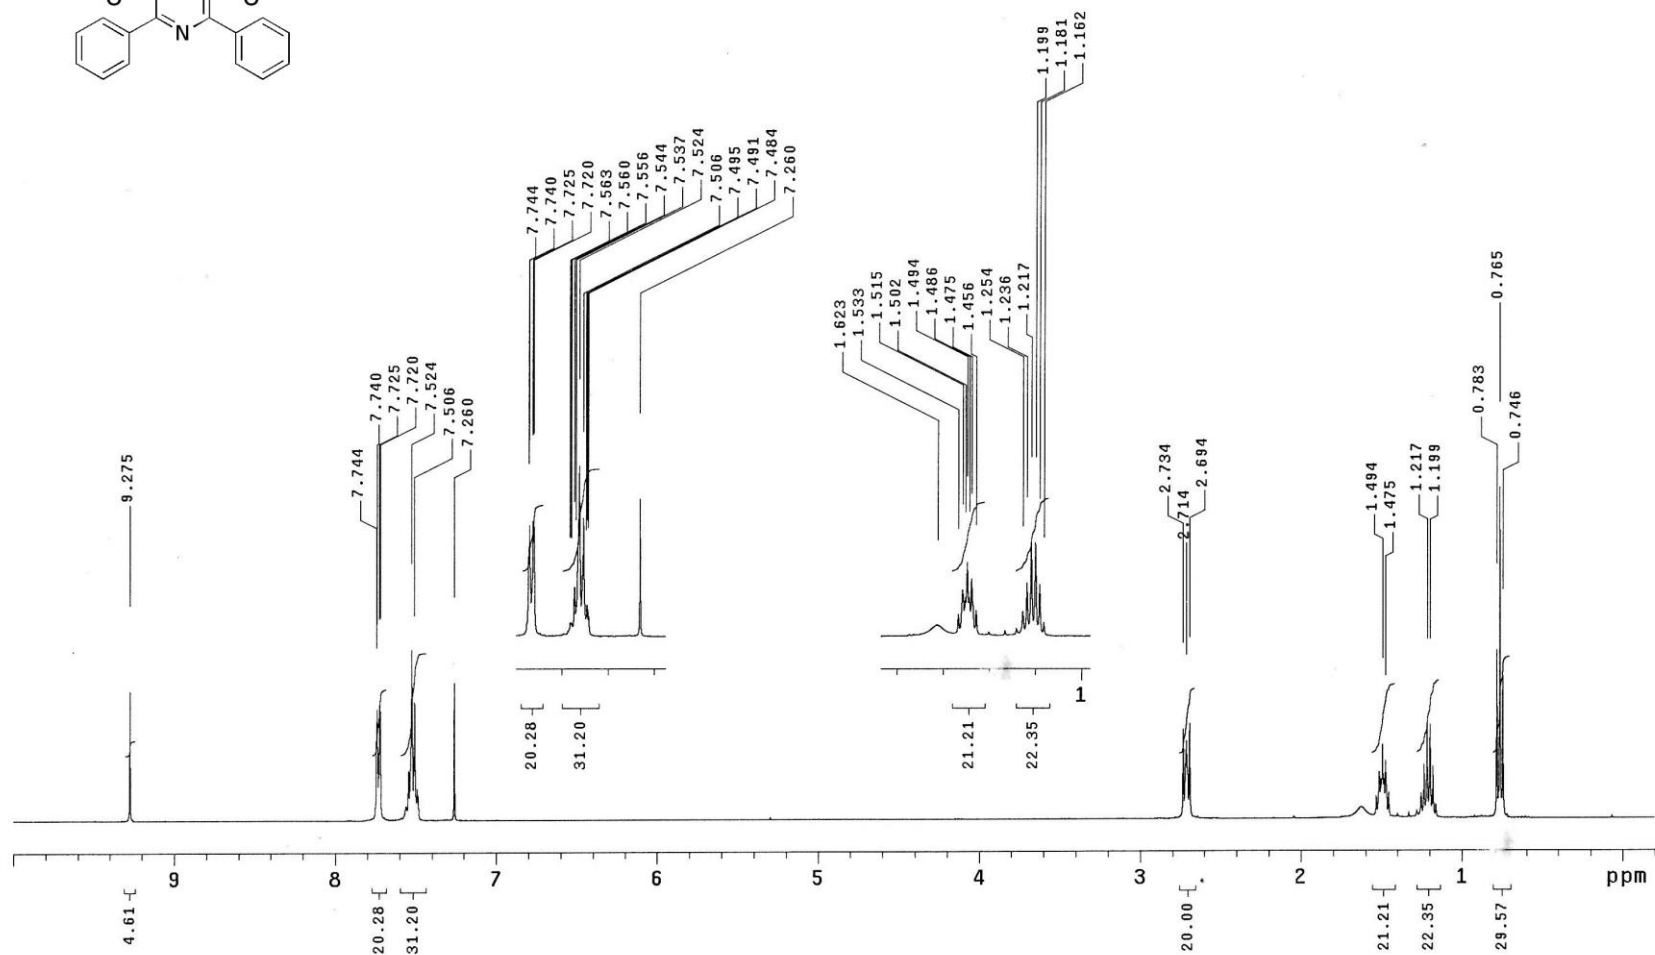

# Compound 4s (<sup>13</sup>C-NMR spectral data)

YCM2143

Pulse Sequence: s2pu1

UNITYplus-400 "unity400"

Date: Dec 22 2022

Solvent: CDCl<sub>3</sub>

Ambient temperature

Total 1872 repetitions

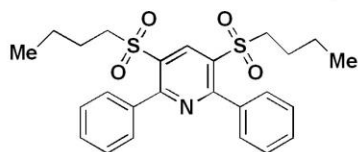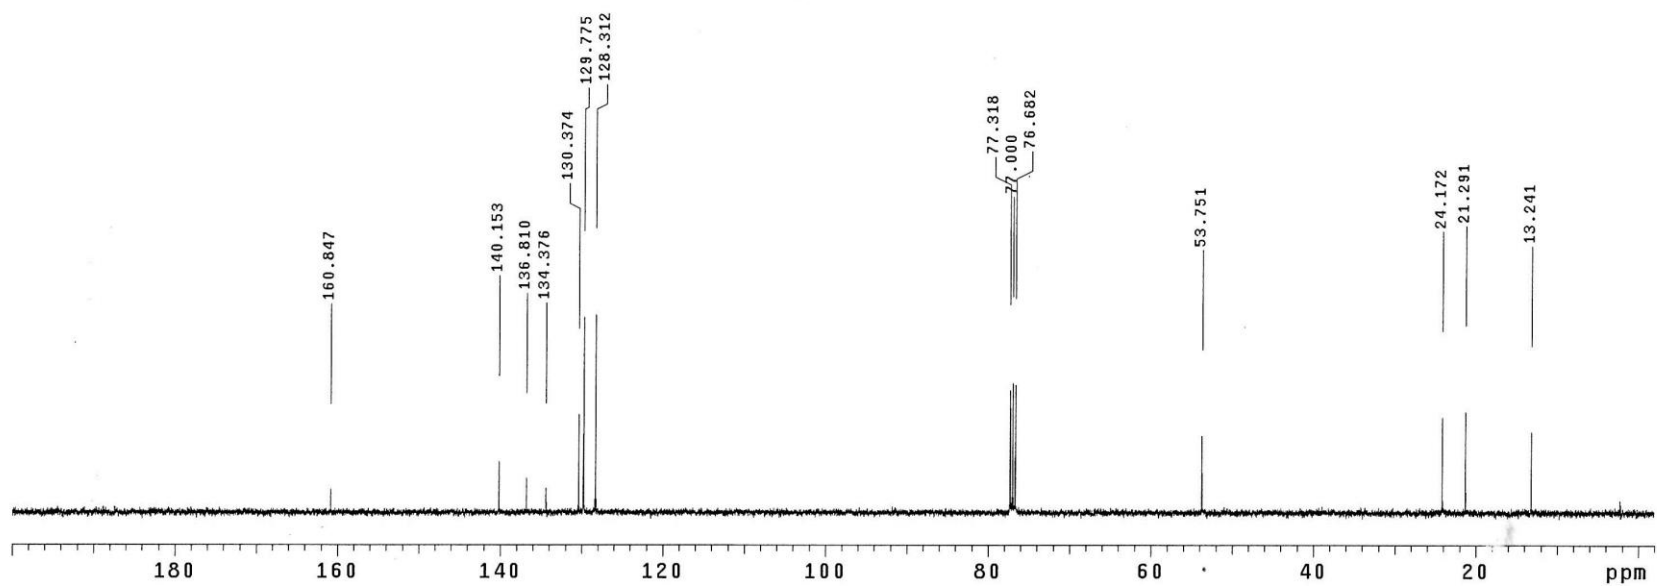

# Compound 5 (<sup>1</sup>H-NMR spectral data)

YCM5282

Pulse Sequence: s2pu1

UNITYplus-400 "unity400"

Date: Sep 30 2024

Solvent: CDCl<sub>3</sub>

Ambient temperature

Total 32 repetition

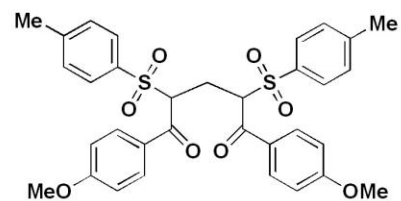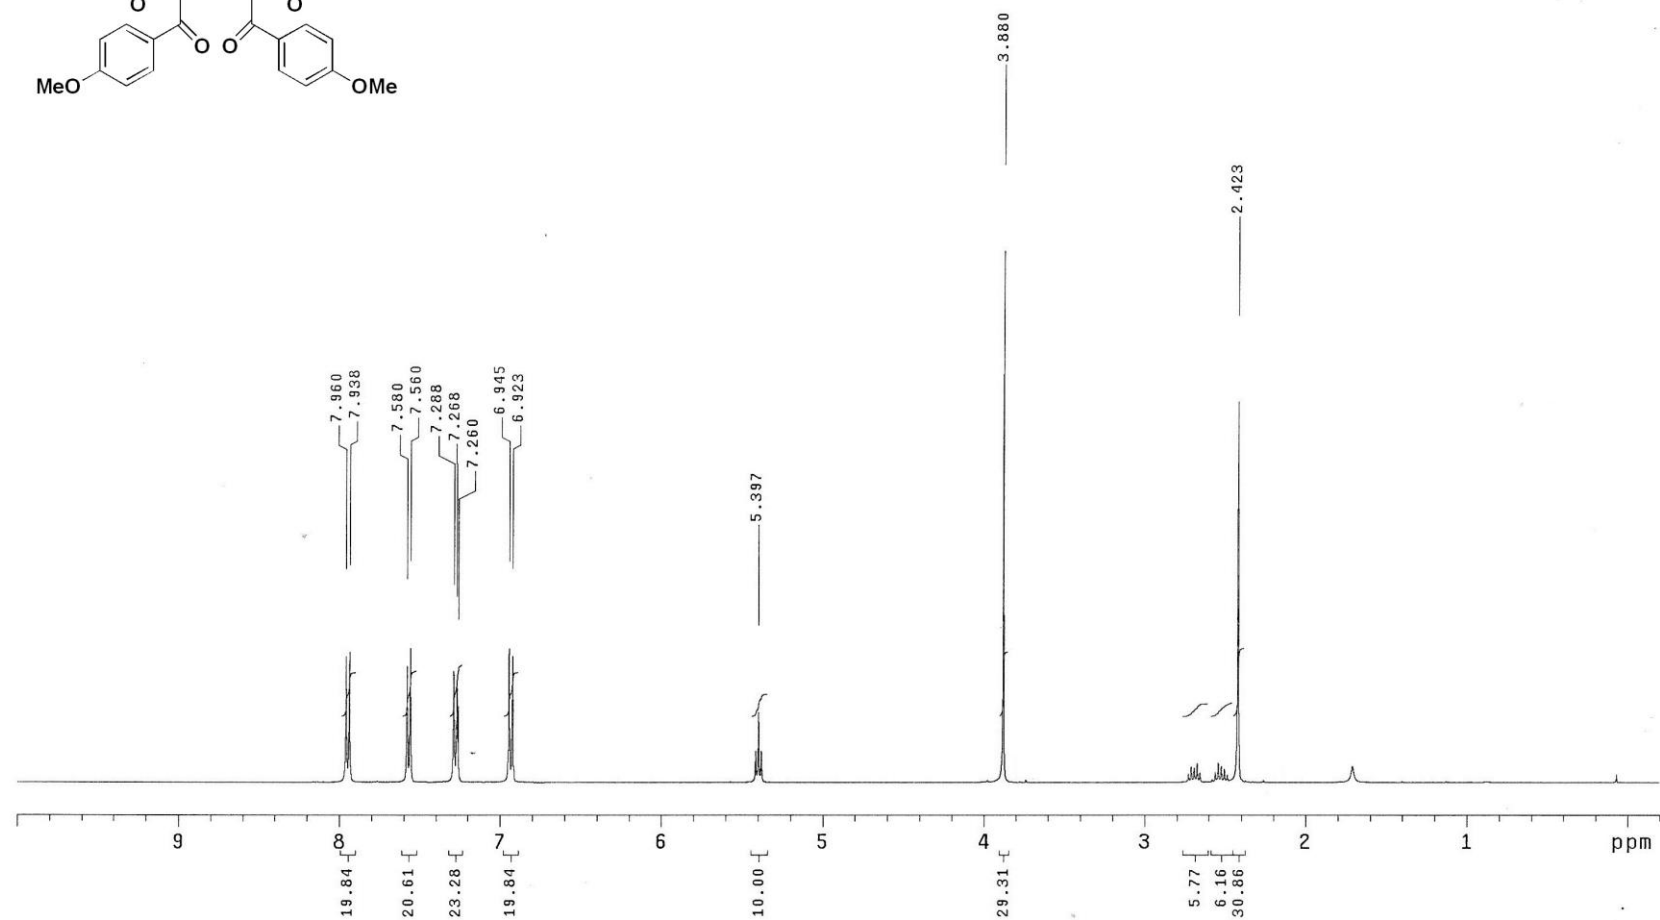

# Compound 5 (<sup>13</sup>C-NMR spectral data)

YCM5282

Pulse Sequence: s2pu1

UNITYplus-400 "unity400"

Date: Sep 30 2024

Solvent: CDCl<sub>3</sub>

Ambient temperature

Total 2048 repetitions

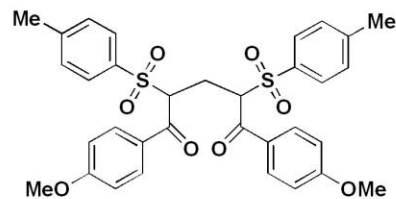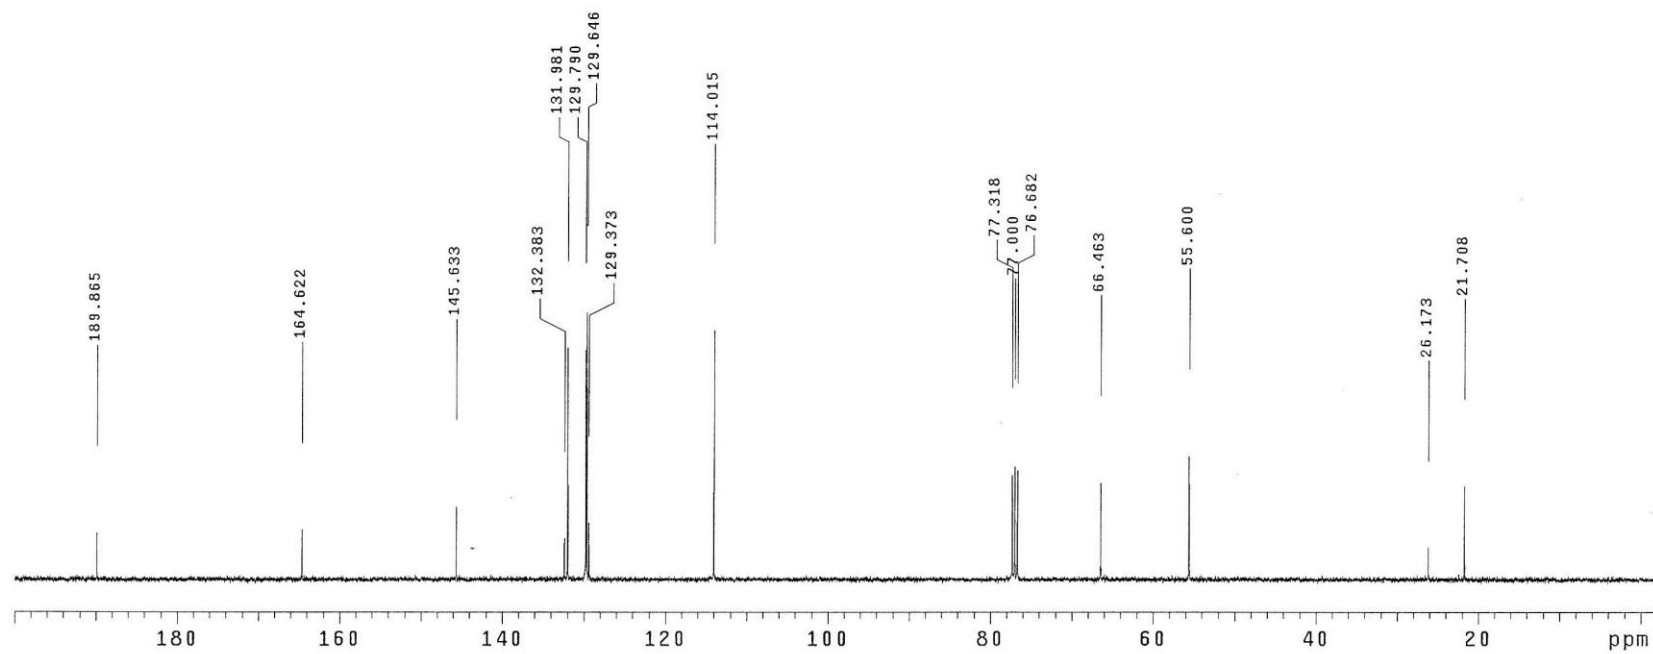

# Compound 6a (<sup>1</sup>H-NMR spectral data)

HAN0Ph14

Pulse Sequence: s2pu1

UNITYplus-400 "unity400"

Date: Oct 22 2018

Solvent: CDCl<sub>3</sub>

Ambient temperature

Total 32 repetitions

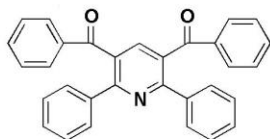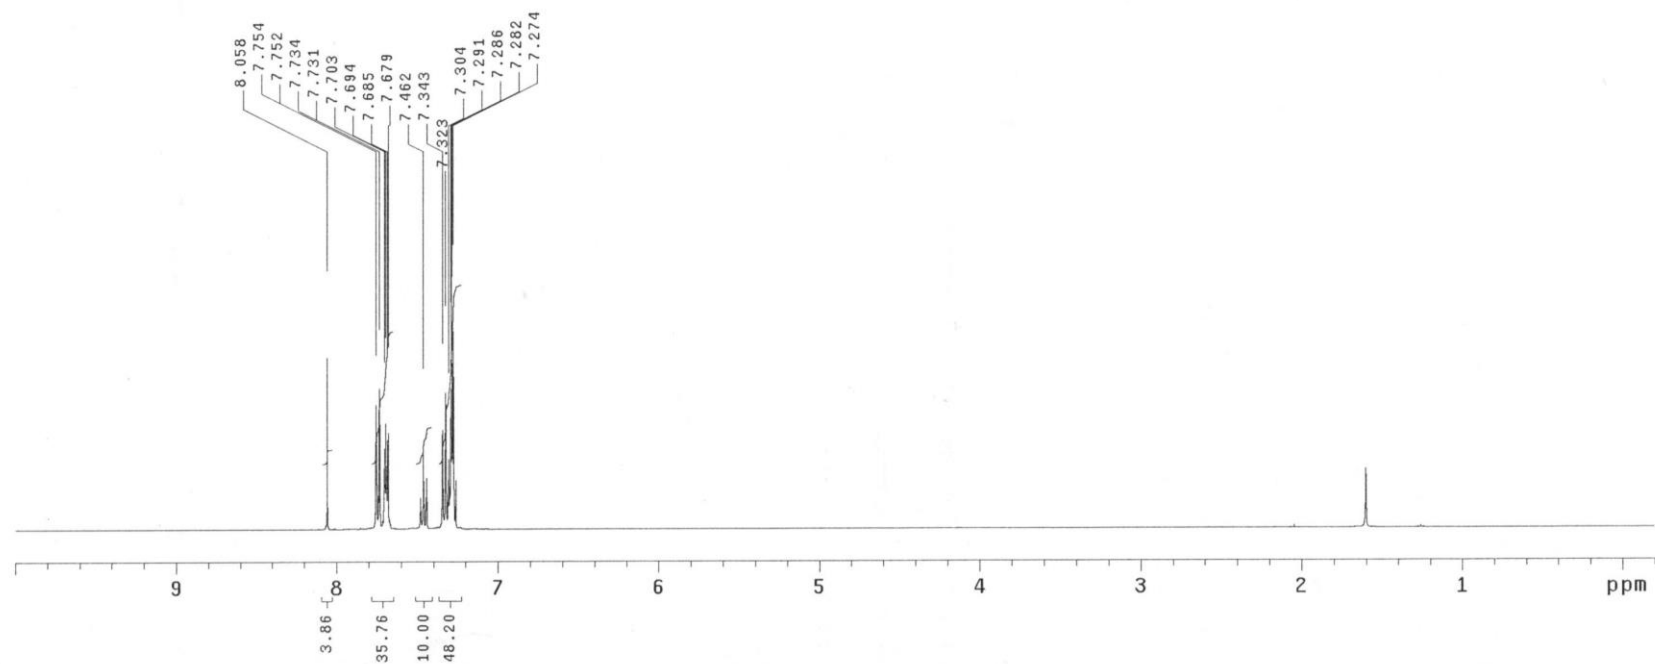

# Compound 6a (<sup>13</sup>C-NMR spectral data)

HANOPh14

Pulse Sequence: s2pu1

UNITYplus-400 "unity400"

Date: Oct 22 2018

Solvent: CDCl<sub>3</sub>

Ambient temperature

Total 400 repetitions

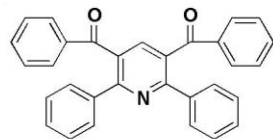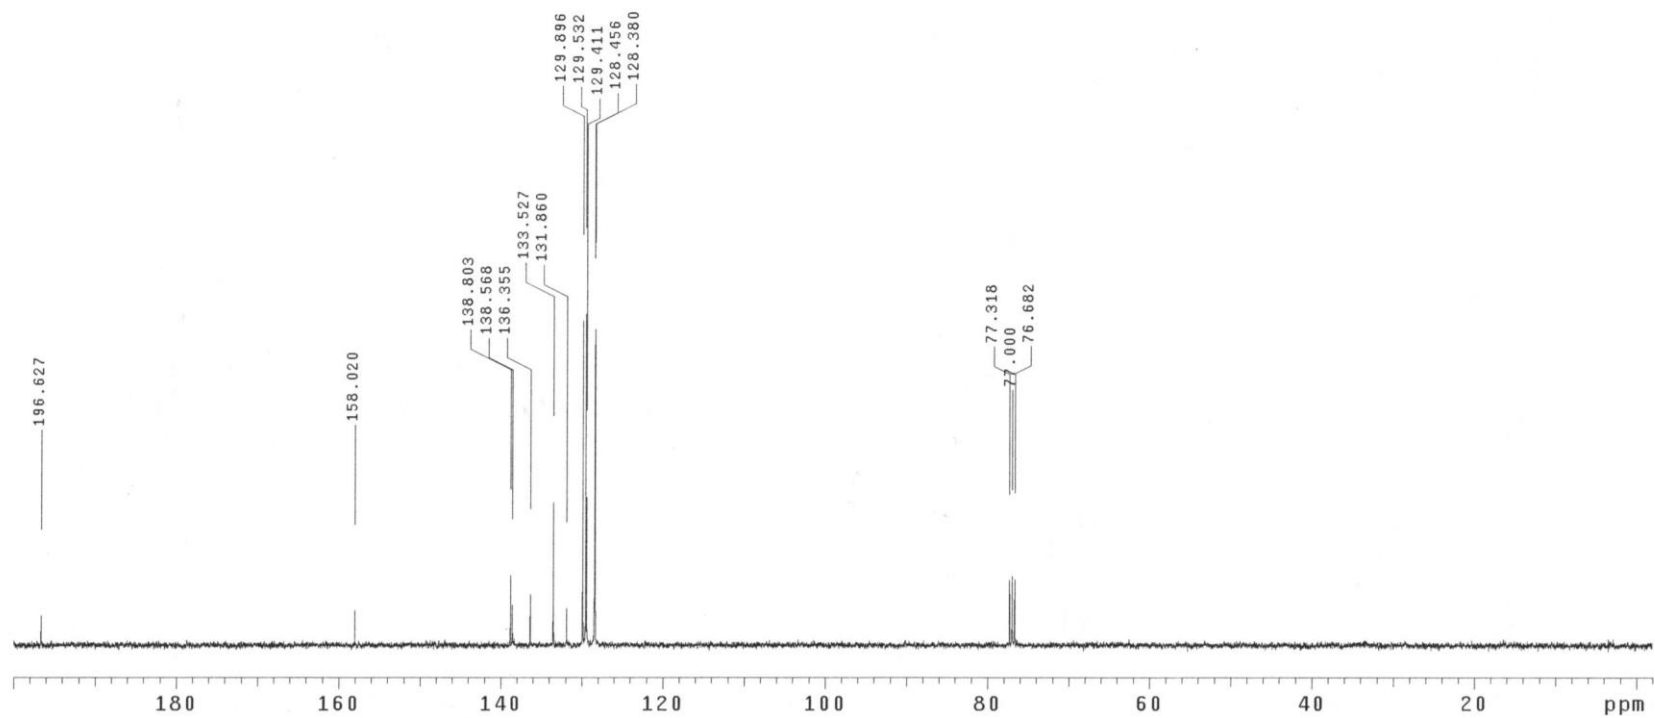

# Compound 8a (<sup>1</sup>H-NMR spectral data)

YCM2329

Pulse Sequence: s2pu1

UNITYplus-400 "unity400"

Date: Dec 19 2022

Solvent: CDCl<sub>3</sub>

Ambient temperature

Total 32 repetitions

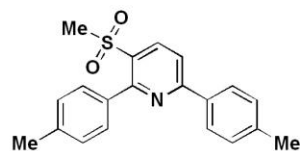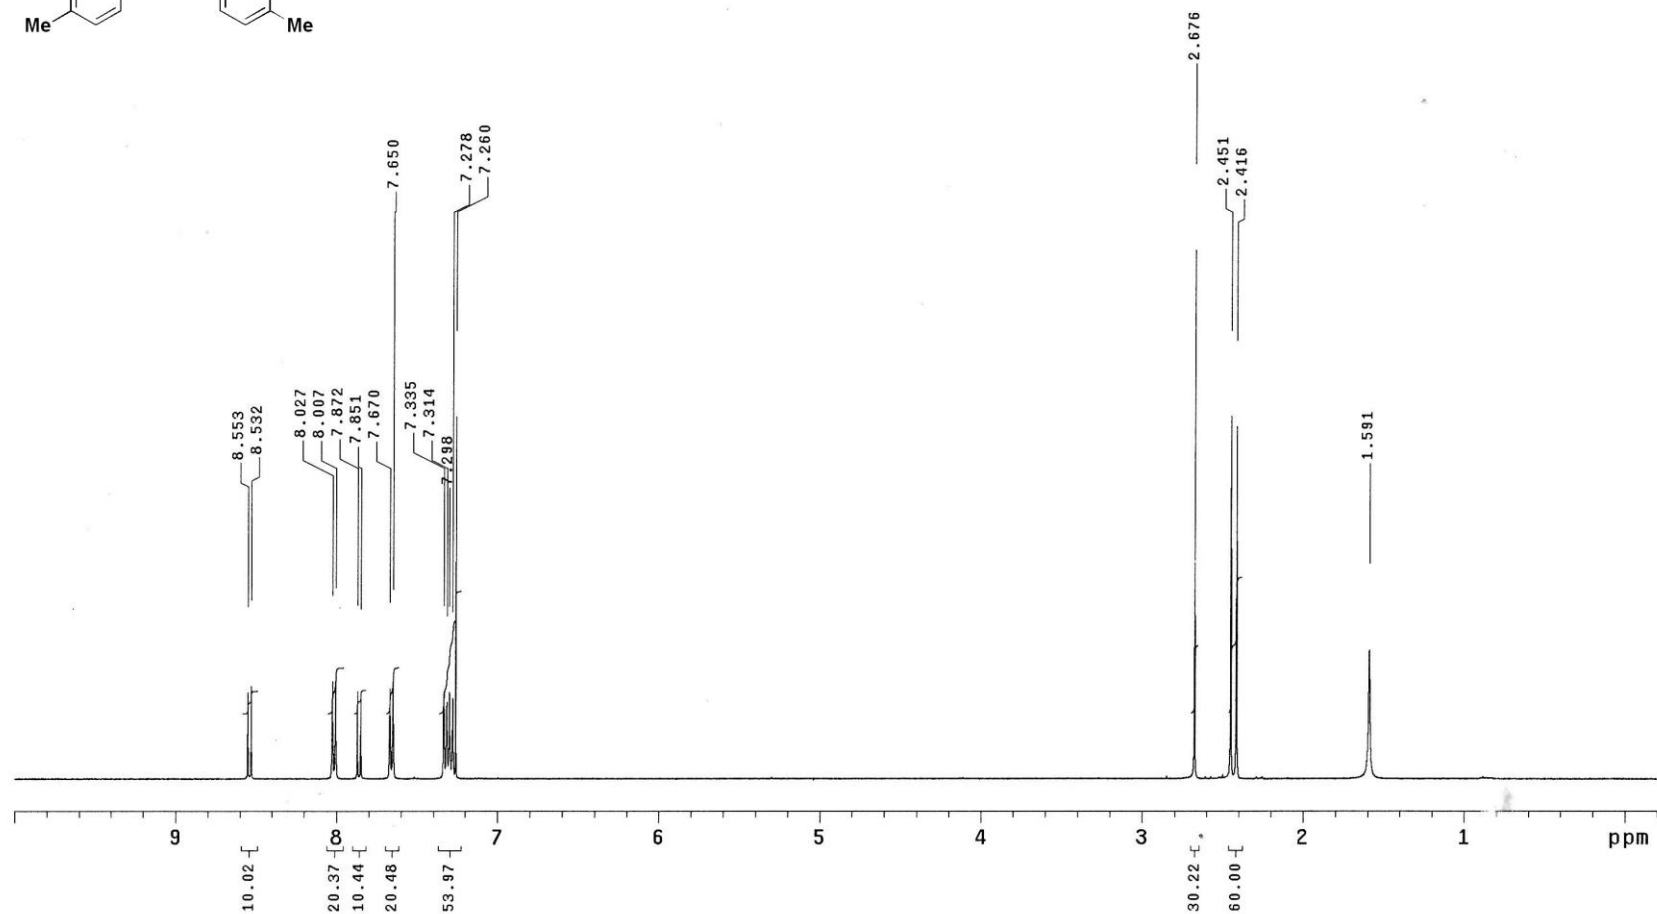

# Compound 8a (<sup>13</sup>C-NMR spectral data)

YCM2329

Pulse Sequence: s2pu1  
UNITYplus-400 "unity400"  
Date: Dec 19 2022  
Solvent: CDCl<sub>3</sub>  
Ambient temperature  
Total 5888 repetitions

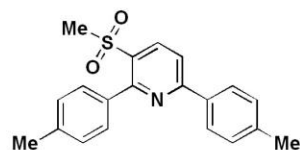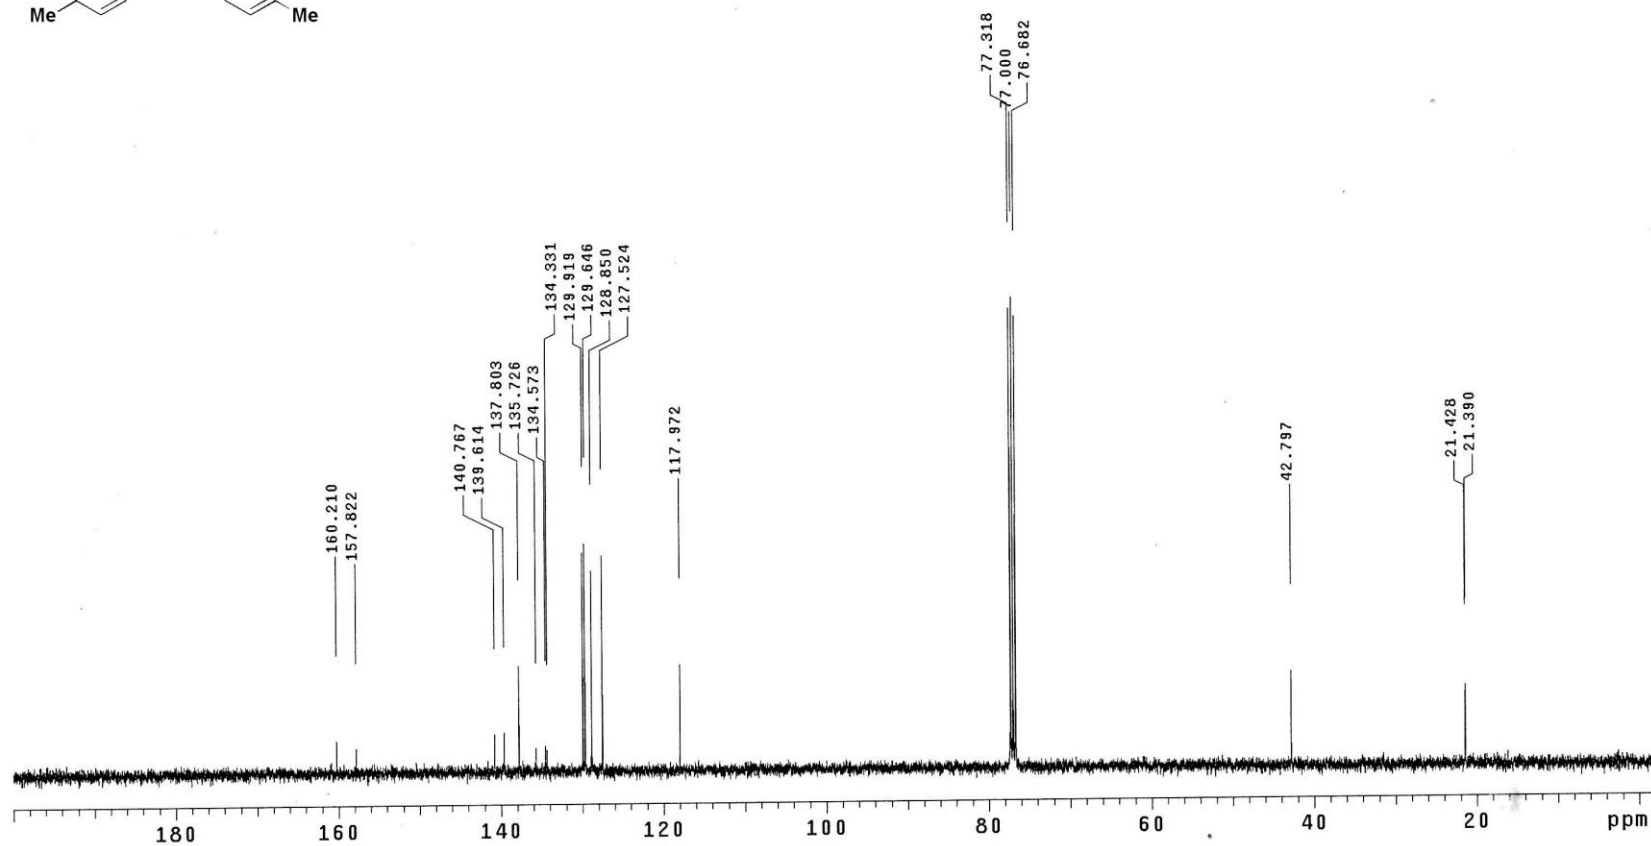



# Compound 9 (<sup>1</sup>H-NMR spectral data)

YC5160

Pulse Sequence: s2pu1  
 UNITYplus-400 "unity400"  
 Date: Jul 26 2023  
 Solvent: CDCl<sub>3</sub>  
 Ambient temperature  
 Total 32 repetitions

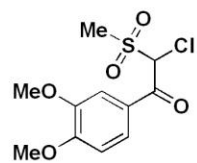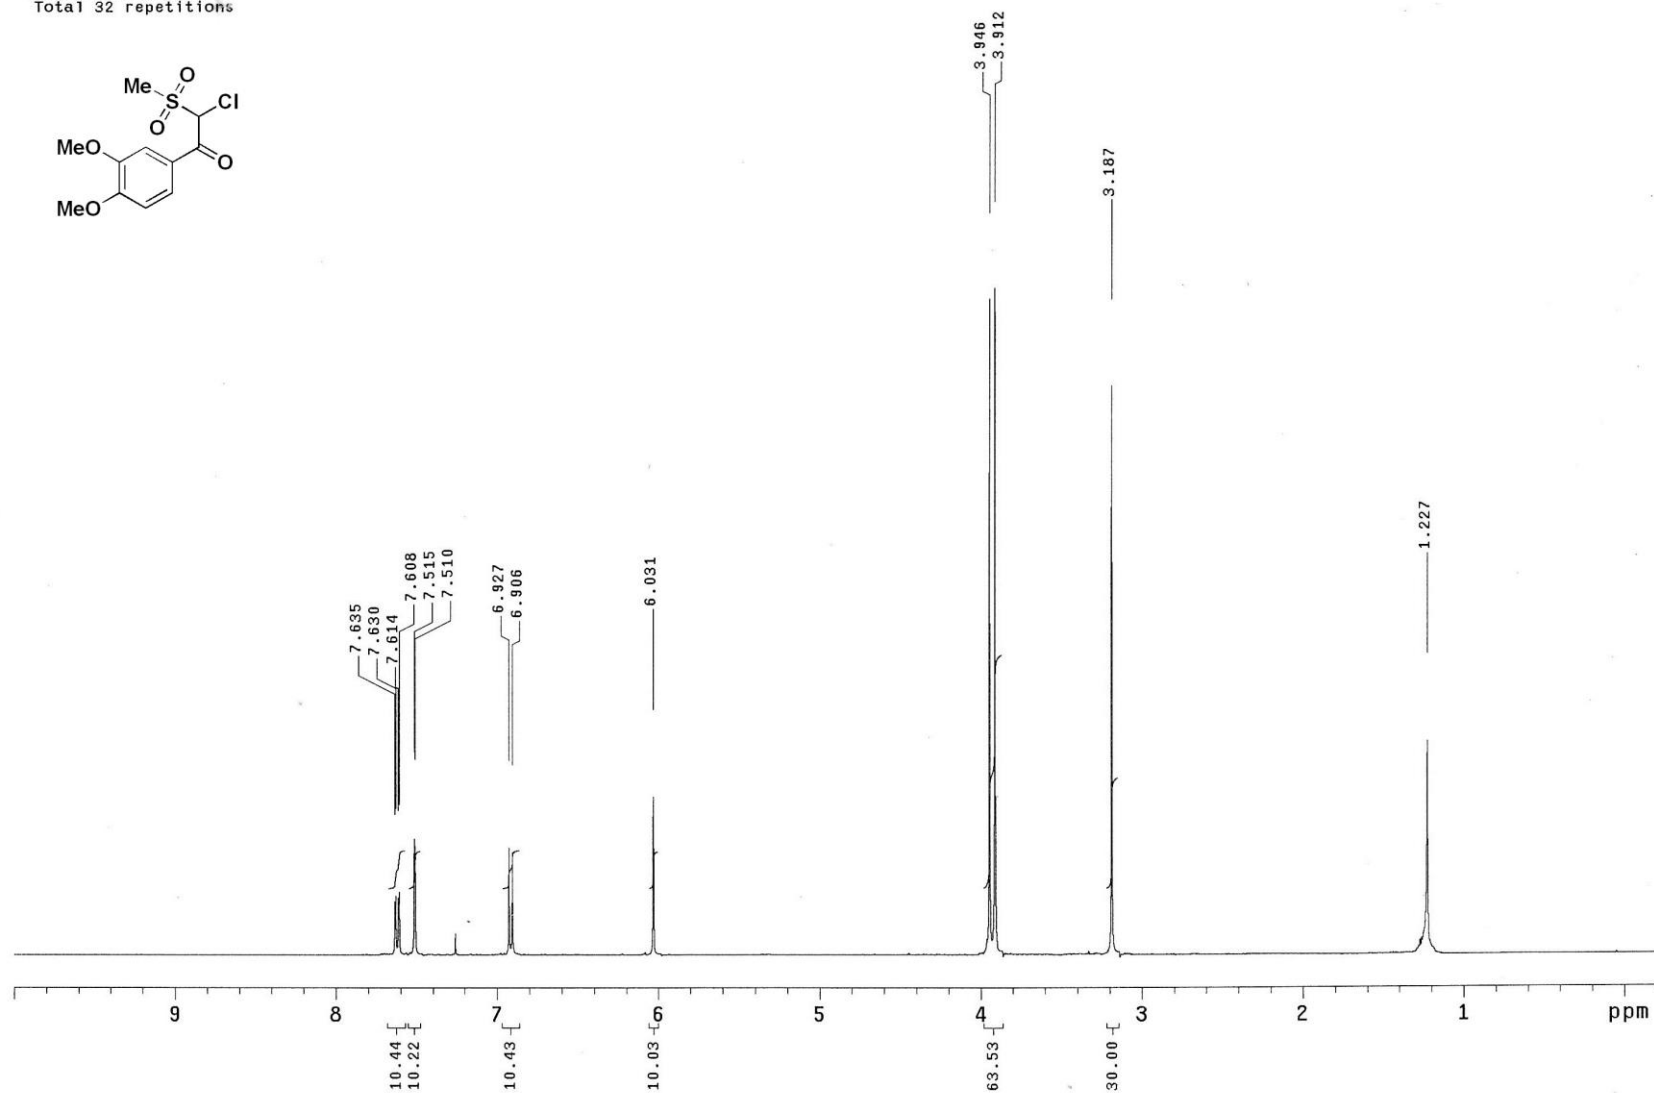

# Compound 9 (<sup>13</sup>C-NMR spectral data)

YC5160

Pulse Sequence: s2pu1  
UNITYplus-400 "unity400"  
Date: Jul 26 2023  
Solvent: CDCl<sub>3</sub>  
Ambient temperature  
Total 1232 repetitions

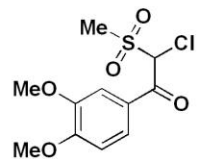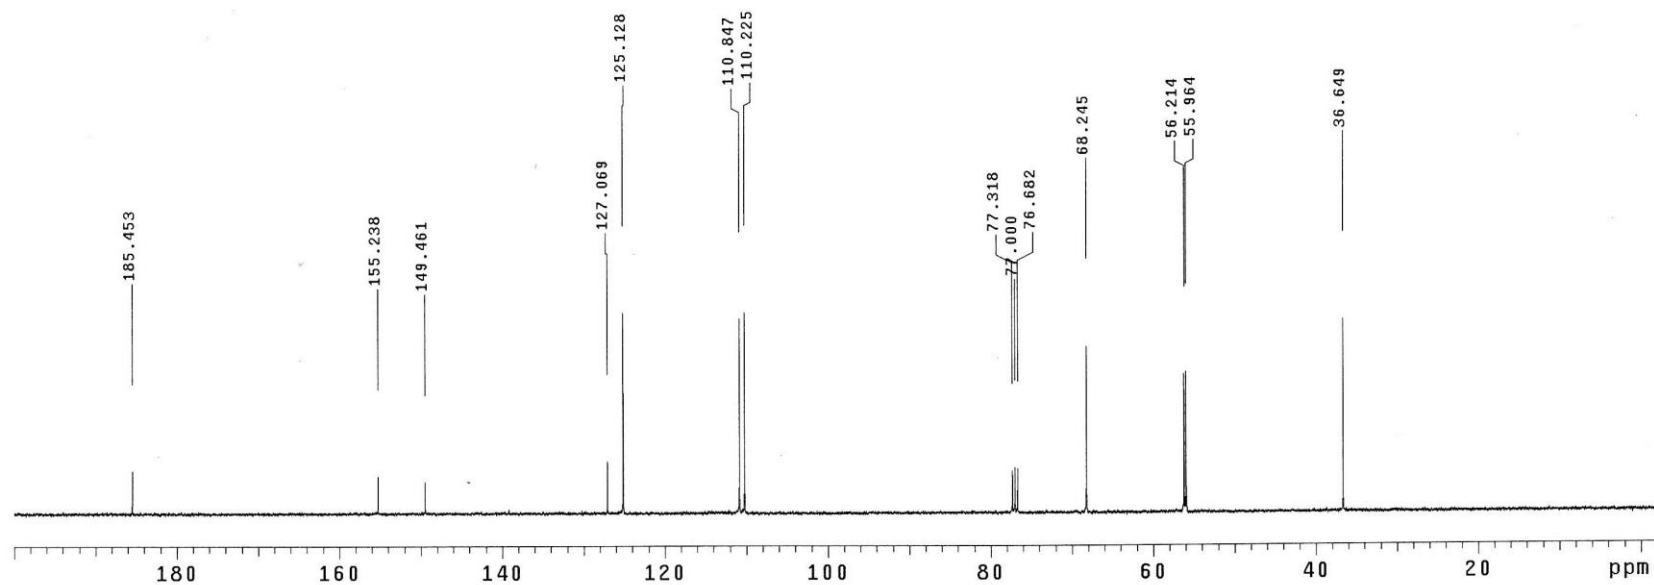

## X-ray crystal data of compound 4b

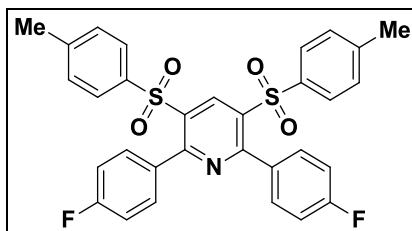

**Sample preparation** : A solution of compound **4b** (30 mg) in CH<sub>2</sub>Cl<sub>2</sub> (10 mL) was placed in a tube (10 mL). EtOAc (2 mL) was added slowly to the vial with a dropper. The vial was closed with little cotton and kept at room temperature for 2 days. Then, colorless prisms were observed.

**Crystal measurement** : X-ray crystal structures were determined with a Bruker Enraf-Nonius single-crystal diffractometer (CAD4, Kappa CCD). Thermal ellipsoids are drawn at 50% probability level.

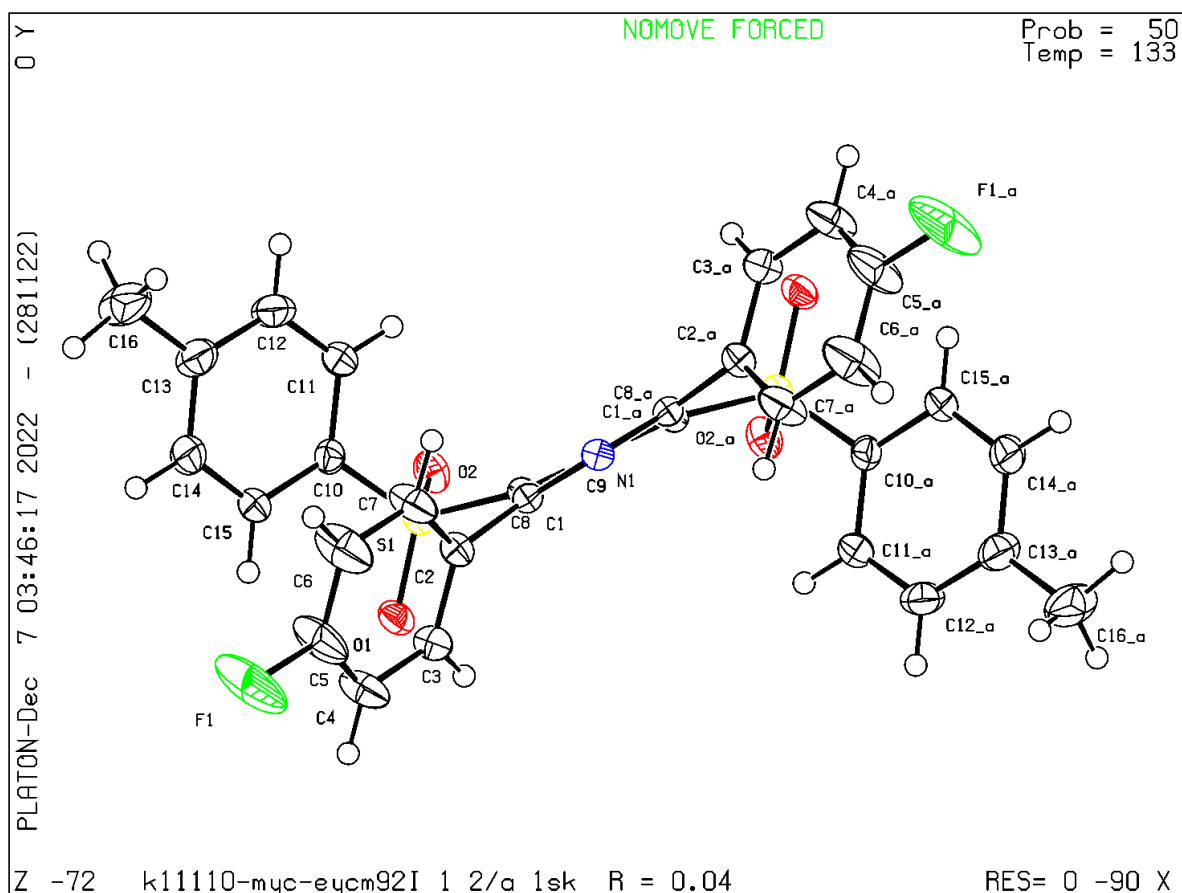

|                                             |                                                                               |
|---------------------------------------------|-------------------------------------------------------------------------------|
| Empirical formula                           | C <sub>31</sub> H <sub>23</sub> F <sub>2</sub> NO <sub>4</sub> S <sub>2</sub> |
| Formula weight                              | 575.62                                                                        |
| Temperature/K                               | 133(2)                                                                        |
| Crystal system                              | monoclinic                                                                    |
| Space group                                 | I2/a                                                                          |
| a/Å                                         | 12.1425(3)                                                                    |
| b/Å                                         | 13.6754(3)                                                                    |
| c/Å                                         | 18.9825(4)                                                                    |
| $\alpha$ /°                                 | 90                                                                            |
| $\beta$ /°                                  | 105.144(2)                                                                    |
| $\gamma$ /°                                 | 90                                                                            |
| Volume/Å <sup>3</sup>                       | 3042.65(12)                                                                   |
| Z                                           | 4                                                                             |
| $\rho_{\text{calc}}$ /cm <sup>3</sup>       | 1.257                                                                         |
| $\mu$ /mm <sup>-1</sup>                     | 0.222                                                                         |
| F(000)                                      | 1192.0                                                                        |
| Crystal size/mm <sup>3</sup>                | 0.15 × 0.15 × 0.1                                                             |
| Radiation                                   | Mo K $\alpha$ ( $\lambda$ = 0.71073)                                          |
| 2 $\Theta$ range for data collection/°      | 3.716 to 49.996                                                               |
| Index ranges                                | -14 ≤ h ≤ 14, -16 ≤ k ≤ 16, -22 ≤ l ≤ 22                                      |
| Reflections collected                       | 19630                                                                         |
| Independent reflections                     | 2685 [ $R_{\text{int}}$ = 0.0308, $R_{\text{sigma}}$ = 0.0197]                |
| Data/restraints/parameters                  | 2685/18/183                                                                   |
| Goodness-of-fit on F <sup>2</sup>           | 1.058                                                                         |
| Final R indexes [ $I \geq 2\sigma(I)$ ]     | $R_1$ = 0.0363, $wR_2$ = 0.0959                                               |
| Final R indexes [all data]                  | $R_1$ = 0.0390, $wR_2$ = 0.0976                                               |
| Largest diff. peak/hole / e Å <sup>-3</sup> | 0.53/-0.46                                                                    |

## X-ray crystal data of compound 4j

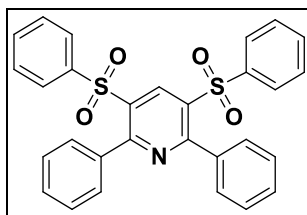

**Sample preparation** : A solution of compound **4j** (30 mg) in CH<sub>2</sub>Cl<sub>2</sub> (10 mL) was placed in a tube (10 mL). EtOAc (2 mL) was added slowly to the vial with a dropper. The vial was closed with little cotton and kept at room temperature for 2 days. Then, colorless prisms were observed.

**Crystal measurement** : X-ray crystal structures were determined with a Bruker Enraf-Nonius single-crystal diffractometer (CAD4, Kappa CCD). Thermal ellipsoids are drawn at 50% probability level.

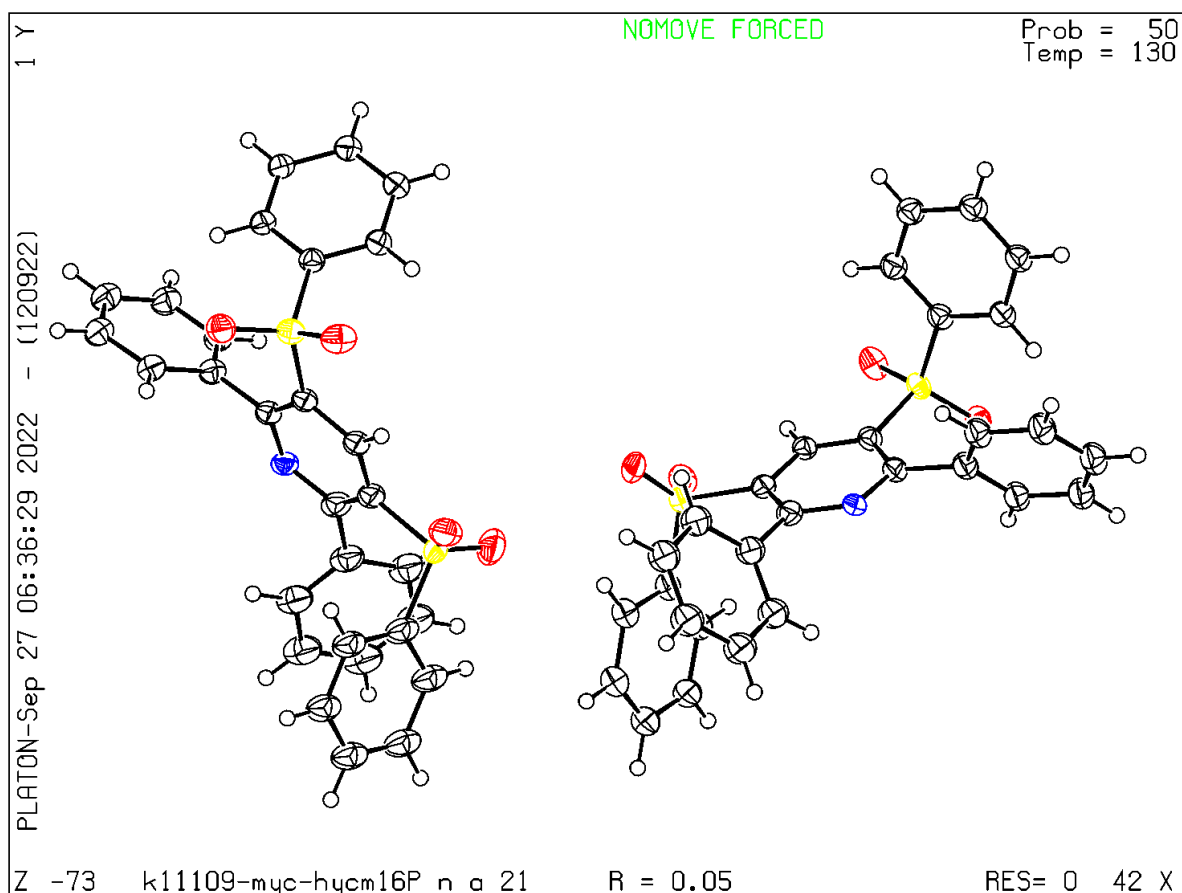

|                                                |                                                                |
|------------------------------------------------|----------------------------------------------------------------|
| Temperature/K                                  | 130(2)                                                         |
| Crystal system                                 | orthorhombic                                                   |
| Space group                                    | Pna2 <sub>1</sub>                                              |
| a/Å                                            | 16.1179(3)                                                     |
| b/Å                                            | 12.2499(2)                                                     |
| c/Å                                            | 26.8761(5)                                                     |
| $\alpha/^\circ$                                | 90                                                             |
| $\beta/^\circ$                                 | 90                                                             |
| $\gamma/^\circ$                                | 90                                                             |
| Volume/Å <sup>3</sup>                          | 5306.49(16)                                                    |
| Z                                              | 4                                                              |
| $\rho_{\text{calc}}/\text{cm}^3$               | 1.281                                                          |
| $\mu/\text{mm}^{-1}$                           | 0.235                                                          |
| F(000)                                         | 2128.0                                                         |
| Crystal size/mm <sup>3</sup>                   | 0.4 × 0.2 × 0.2                                                |
| Radiation                                      | MoK $\alpha$ ( $\lambda$ = 0.71073)                            |
| 2 $\theta$ range for data collection/ $^\circ$ | 3.654 to 49.998                                                |
| Index ranges                                   | -19 ≤ h ≤ 15, -14 ≤ k ≤ 12, -31 ≤ l ≤ 31                       |
| Reflections collected                          | 36279                                                          |
| Independent reflections                        | 8765 [ $R_{\text{int}}$ = 0.0266, $R_{\text{sigma}}$ = 0.0280] |
| Data/restraints/parameters                     | 8765/361/649                                                   |
| Goodness-of-fit on F <sup>2</sup>              | 1.060                                                          |
| Final R indexes [ $I \geq 2\sigma(I)$ ]        | $R_1$ = 0.0501, $wR_2$ = 0.1213                                |
| Final R indexes [all data]                     | $R_1$ = 0.0550, $wR_2$ = 0.1244                                |
| Largest diff. peak/hole / e Å <sup>-3</sup>    | 0.47/-0.60                                                     |
| Flack parameter                                | 0.070(19)                                                      |

## X-ray crystal data of compound 5

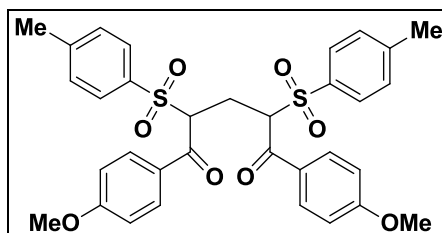

**Sample preparation** : A solution of compound **5** (30 mg) in CH<sub>2</sub>Cl<sub>2</sub> (10 mL) was placed in a tube (10 mL). EtOAc (2 mL) was added slowly to the vial with a dropper. The vial was closed with little cotton and kept at room temperature for 2 days. Then, colorless prisms were observed.

**Crystal measurement** : X-ray crystal structures were determined with a Bruker Enraf-Nonius single-crystal diffractometer (CAD4, Kappa CCD). Thermal ellipsoids are drawn at 50% probability level.

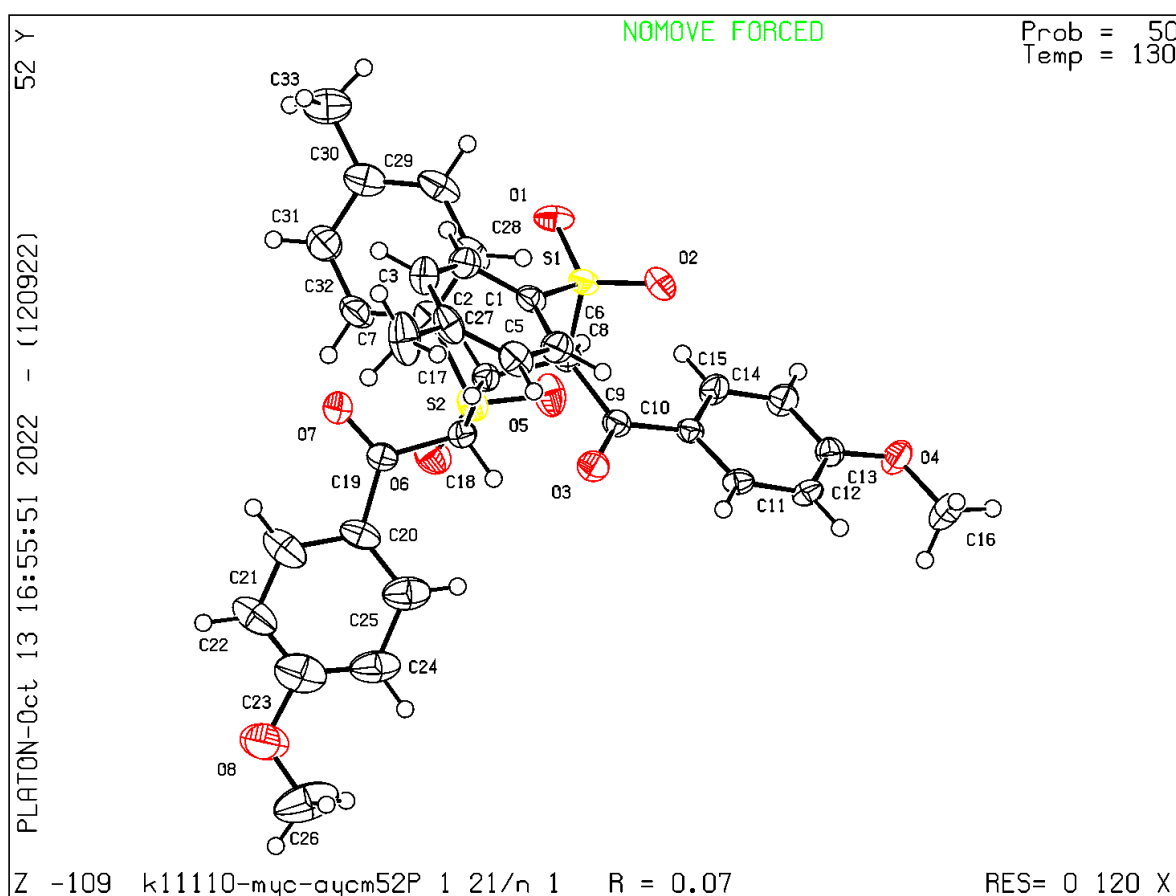

|                                             |                                                               |
|---------------------------------------------|---------------------------------------------------------------|
| Empirical formula                           | C <sub>33</sub> H <sub>32</sub> O <sub>8</sub> S <sub>2</sub> |
| Formula weight                              | 620.70                                                        |
| Temperature/K                               | 130(2)                                                        |
| Crystal system                              | monoclinic                                                    |
| Space group                                 | P2 <sub>1</sub> /n                                            |
| a/Å                                         | 12.3904(6)                                                    |
| b/Å                                         | 21.7691(7)                                                    |
| c/Å                                         | 12.4795(6)                                                    |
| α/°                                         | 90                                                            |
| β/°                                         | 117.735(6)                                                    |
| γ/°                                         | 90                                                            |
| Volume/Å <sup>3</sup>                       | 2979.3(3)                                                     |
| Z                                           | 4                                                             |
| ρ <sub>calc</sub> /g/cm <sup>3</sup>        | 1.384                                                         |
| μ/mm <sup>-1</sup>                          | 0.231                                                         |
| F(000)                                      | 1304.0                                                        |
| Crystal size/mm <sup>3</sup>                | 0.4 × 0.4 × 0.3                                               |
| Radiation                                   | MoKα (λ = 0.71073)                                            |
| 2Θ range for data collection/°              | 3.742 to 49.994                                               |
| Index ranges                                | -14 ≤ h ≤ 14, -25 ≤ k ≤ 25, -14 ≤ l ≤ 14                      |
| Reflections collected                       | 59375                                                         |
| Independent reflections                     | 5233 [R <sub>int</sub> = 0.0810, R <sub>sigma</sub> = 0.0350] |
| Data/restraints/parameters                  | 5233/84/392                                                   |
| Goodness-of-fit on F <sup>2</sup>           | 1.026                                                         |
| Final R indexes [I ≥ 2σ (I)]                | R <sub>1</sub> = 0.0717, wR <sub>2</sub> = 0.1723             |
| Final R indexes [all data]                  | R <sub>1</sub> = 0.0830, wR <sub>2</sub> = 0.1793             |
| Largest diff. peak/hole / e Å <sup>-3</sup> | 1.48/-0.65                                                    |
